# Supplementary material
Source: publisher figshare collection journal article supplement (https://geolsoc.figshare.com/articles/dataset/_/3452852)

Table 2

LA-MC-ICPMS Lu-Hf isotope data of zircon

| zrc-no.           | $^{176}\text{Yb}/^{177}\text{Hf}$ $\pm 2\sigma$ | $^{176}\text{Lu}/^{177}\text{Hf}$ $\pm 2\sigma$ | $^{178}\text{Hf}/^{177}\text{Hf}$ | $^{180}\text{Hf}/^{177}\text{Hf}$ | $\text{Sig}_{\text{Hf}}$ <sup>b</sup> | $^{176}\text{Hf}/^{177}\text{Hf}$ $\pm 2\sigma$ | $^{176}\text{Hf}/^{177}\text{Hf}_{(t)}$ $\pm 2\sigma$ | $\varepsilon_{\text{Hf}(t)}$ <sup>d</sup> | $\pm 2\sigma$ <sup>c</sup> | $T_{\text{DM2}}$ <sup>e</sup> | age <sup>f</sup> | $\pm 2\sigma$ <sup>i</sup> | $\varepsilon_{\text{Hf}(int)}$ <sup>g</sup> | $T_{\text{DM2}}$ <sup>g</sup> |      |       |             |
|-------------------|-------------------------------------------------|-------------------------------------------------|-----------------------------------|-----------------------------------|---------------------------------------|-------------------------------------------------|-------------------------------------------------------|-------------------------------------------|----------------------------|-------------------------------|------------------|----------------------------|---------------------------------------------|-------------------------------|------|-------|-------------|
|                   |                                                 |                                                 |                                   |                                   | (V)                                   |                                                 |                                                       |                                           |                            | (Ga)                          | (Ma)             |                            |                                             | (Ga)                          |      |       |             |
| <b>sample AG7</b> |                                                 |                                                 |                                   |                                   |                                       |                                                 |                                                       |                                           |                            |                               |                  |                            |                                             | <b>3644 Ma</b>                |      |       |             |
|                   |                                                 |                                                 |                                   |                                   |                                       |                                                 |                                                       |                                           |                            |                               |                  |                            |                                             | <b>*3191 Ma</b>               |      |       |             |
| 1c                | 0.0587                                          | 11                                              | 0.00142                           | 2                                 | 1.46718                               | 1.88674                                         | 5                                                     | 0.280453                                  | 46                         | 0.280355                      | -3.9             | 1.6                        | 4.01                                        | 3579                          | 27   | -2.4  | 3.98        |
| 4c                | 0.0383                                          | 6                                               | 0.00088                           | 1                                 | 1.46724                               | 1.88660                                         | 6                                                     | 0.280478                                  | 48                         | 0.280416                      | -0.1             | 1.7                        | 3.86                                        | 3644                          | 27   | -0.1  | 3.86        |
| 6r                | 0.0511                                          | 16                                              | 0.00160                           | 11                                | 1.46711                               | 1.88673                                         | 19                                                    | 0.280476                                  | 43                         | 0.280381                      | -14.6            | 1.5                        | 4.22                                        | 3087                          | 26   | -2.0  | 4.17        |
| 8c                | 0.1252                                          | 13                                              | 0.00298                           | 3                                 | 1.46717                               | 1.88652                                         | 19                                                    | 0.280604                                  | 43                         | 0.280409                      | -6.2             | 1.5                        | 4.00                                        | 3402                          | 25   | -0.9  | 3.90        |
| 9c                | 0.0406                                          | 16                                              | 0.00091                           | 2                                 | 1.46712                               | 1.88675                                         | 6                                                     | 0.280469                                  | 45                         | 0.280405                      | -0.9             | 1.6                        | 3.89                                        | 3628                          | 29   | -0.5  | 3.88        |
| 10c               | 0.0632                                          | 9                                               | 0.00143                           | 2                                 | 1.46714                               | 1.88657                                         | 7                                                     | 0.280444                                  | 47                         | 0.280345                      | -4.4             | 1.7                        | 4.04                                        | 3570                          | 20   | -2.7  | 4.00        |
| 11c               | 0.0689                                          | 50                                              | 0.00156                           | 7                                 | 1.46706                               | 1.88671                                         | 5                                                     | 0.280424                                  | 45                         | 0.280314                      | -4.0             | 1.6                        | 4.06                                        | 3634                          | 15   | -3.8  | 4.06        |
| 12c               | 0.0348                                          | 18                                              | 0.00083                           | 2                                 | 1.46718                               | 1.88675                                         | 5                                                     | 0.280488                                  | 47                         | 0.280430                      | 0.3              | 1.7                        | 3.83                                        | 3640                          | 17   | 0.4   | 3.83        |
| 13c               | 0.1023                                          | 19                                              | 0.00236                           | 5                                 | 1.46717                               | 1.88675                                         | 14                                                    | 0.280560                                  | 41                         | 0.280394                      | -0.8             | 1.5                        | 3.90                                        | 3647                          | 13   | -0.9  | 3.90        |
| 14r               | 0.0686                                          | 38                                              | 0.00173                           | 5                                 | 1.46707                               | 1.88652                                         | 10                                                    | 0.280488                                  | 45                         | 0.280414                      | -33.5            | 1.6                        | 4.56                                        | 2232                          | 27   | -1.9  | 3.96        |
| 15c               | 0.0386                                          | 14                                              | 0.00108                           | 9                                 | 1.46707                               | 1.88668                                         | 6                                                     | 0.280452                                  | 46                         | 0.280376                      | -2.0             | 1.6                        | 3.95                                        | 3625                          | 24   | -1.6  | 3.94        |
| 16c               | 0.0970                                          | 20                                              | 0.00223                           | 4                                 | 1.46719                               | 1.88674                                         | 7                                                     | 0.280510                                  | 47                         | 0.280354                      | -2.7             | 1.7                        | 3.99                                        | 3630                          | 15   | -2.4  | 3.98        |
| 16c               | 0.0368                                          | 5                                               | 0.00091                           | 2                                 | 1.46712                               | 1.88669                                         | 7                                                     | 0.280438                                  | 45                         | 0.280375                      | -2.5             | 1.6                        | 3.96                                        | 3607                          | 18   | -1.6  | 3.94        |
| 20c               | 0.0981                                          | 22                                              | 0.00227                           | 2                                 | 1.46715                               | 1.88668                                         | 6                                                     | 0.280506                                  | 50                         | 0.280346                      | -2.3             | 1.8                        | 3.99                                        | 3657                          | 14   | -2.6  | 4.00        |
| 21c               | 0.0795                                          | 18                                              | 0.00210                           | 11                                | 1.46708                               | 1.88674                                         | 8                                                     | 0.280533                                  | 42                         | 0.280387                      | -2.1             | 1.5                        | 3.94                                        | 3606                          | 22   | -1.2  | 3.92        |
| 22c               | 0.0846                                          | 35                                              | 0.00197                           | 4                                 | 1.46710                               | 1.88675                                         | 7                                                     | 0.280484                                  | 47                         | 0.280344                      | -1.9             | 1.7                        | 3.98                                        | 3678                          | 14   | -2.6  | 4.00        |
| 25c               | 0.0643                                          | 9                                               | 0.00155                           | 1                                 | 1.46713                               | 1.88676                                         | 14                                                    | 0.280473                                  | 41                         | 0.280364                      | -1.7             | 1.5                        | 3.96                                        | 3654                          | 13   | -2.0  | 3.96        |
| 26c               | 0.0992                                          | 20                                              | 0.00234                           | 5                                 | 1.46720                               | 1.88679                                         | 15                                                    | 0.280591                                  | 41                         | 0.280427                      | 0.1              | 1.5                        | 3.84                                        | 3635                          | 7    | 0.2   | 3.84        |
| 27c               | 0.0348                                          | 18                                              | 0.00083                           | 2                                 | 1.46718                               | 1.88675                                         | 5                                                     | 0.280488                                  | 47                         | 0.280430                      | 0.3              | 1.7                        | 3.83                                        | 3642                          | 19   | 0.4   | 3.83        |
| 27r               | 0.0525                                          | 21                                              | 0.00189                           | 12                                | 1.46712                               | 1.88674                                         | 9                                                     | 0.280662                                  | 44                         | 0.280554                      | -10.5            | 1.6                        | 3.93                                        | 3001                          | 19   | *-6.3 | <b>3.85</b> |
| 28c               | 0.0327                                          | 6                                               | 0.00080                           | 1                                 | 1.46710                               | 1.88673                                         | 13                                                    | 0.280434                                  | 40                         | 0.280377                      | -0.6             | 1.4                        | 3.91                                        | 3683                          | 17   | -1.5  | 3.93        |
| 29c               | 0.0890                                          | 12                                              | 0.00234                           | 4                                 | 1.46711                               | 1.88675                                         | 17                                                    | 0.280535                                  | 40                         | 0.280369                      | -1.6             | 1.4                        | 3.95                                        | 3651                          | 5    | -1.8  | 3.95        |
| 31r               | 0.0382                                          | 15                                              | 0.00153                           | 7                                 | 1.46714                               | 1.88673                                         | 7                                                     | 0.280610                                  | 47                         | 0.280518                      | -8.6             | 1.7                        | 3.93                                        | 3136                          | 14   | *-7.3 | <b>3.90</b> |
| 34c               | 0.0392                                          | 6                                               | 0.00092                           | 1                                 | 1.46709                               | 1.88671                                         | 6                                                     | 0.280408                                  | 45                         | 0.280344                      | -3.1             | 1.6                        | 4.01                                        | 3625                          | 15   | -2.7  | 4.00        |
| 36c               | 0.0376                                          | 5                                               | 0.00088                           | 1                                 | 1.46722                               | 1.88661                                         | 7                                                     | 0.280420                                  | 43                         | 0.280358                      | -1.8             | 1.5                        | 3.96                                        | 3659                          | 18   | -2.2  | 3.97        |
| 37c               | 0.0091                                          | 4                                               | 0.00034                           | 2                                 | 1.46711                               | 1.88674                                         | 9                                                     | 0.280735                                  | 42                         | 0.280715                      | -0.3             | 1.5                        | 3.52                                        | 3190                          | 11   | *-0.3 | <b>3.52</b> |
| 38c               | 0.0790                                          | 15                                              | 0.00182                           | 1                                 | 1.46721                               | 1.88664                                         | 15                                                    | 0.280520                                  | 41                         | 0.280392                      | -1.0             | 1.5                        | 3.91                                        | 3643                          | 15   | -1.0  | 3.91        |
|                   |                                                 |                                                 |                                   |                                   |                                       |                                                 |                                                       |                                           |                            |                               |                  |                            |                                             | mean                          | 3.95 |       |             |

sample AG6c

|     |        |    |         |    |         |         |    |          |    |          |       |     |      |      | 2sd       | 0.15    |             |
|-----|--------|----|---------|----|---------|---------|----|----------|----|----------|-------|-----|------|------|-----------|---------|-------------|
|     |        |    |         |    |         |         |    |          |    |          |       |     |      |      | 3665 Ma   |         |             |
|     |        |    |         |    |         |         |    |          |    |          |       |     |      |      | *3120 Ma  |         |             |
|     |        |    |         |    |         |         |    |          |    |          |       |     |      |      | **3220 Ma |         |             |
| 1c  | 0.0307 | 6  | 0.00084 | 1  | 1.46713 | 1.88674 | 9  | 0.280840 | 41 | 0.280789 | 1.2   | 1.5 | 3.40 | 3143 | 17        | *0.7    | <b>3.41</b> |
| 2c  | 0.0333 | 5  | 0.00091 | 1  | 1.46720 | 1.88657 | 9  | 0.280833 | 43 | 0.280779 | 0.0   | 1.5 | 3.43 | 3107 | 20        | *0.3    | <b>3.43</b> |
| 2c  | 0.0360 | 20 | 0.00098 | 6  | 1.46712 | 1.88673 | 9  | 0.280810 | 43 | 0.280751 | -0.5  | 1.5 | 3.48 | 3128 | 19        | *-0.7   | <b>3.48</b> |
| 3c  | 0.0522 | 13 | 0.00146 | 2  | 1.46708 | 1.88674 | 8  | 0.280864 | 41 | 0.280777 | -0.8  | 1.5 | 3.45 | 3075 | 19        | *0.2    | <b>3.43</b> |
| 4c  | 0.1014 | 23 | 0.00292 | 8  | 1.46707 | 1.88674 | 10 | 0.280541 | 44 | 0.280353 | -9.5  | 1.6 | 4.14 | 3345 | 34        | -2.5    | 4.01        |
| 4r  | 0.0648 | 13 | 0.00223 | 8  | 1.46723 | 1.88678 | 11 | 0.280600 | 46 | 0.280465 | -10.4 | 1.6 | 4.03 | 3139 | 29        | 1.3     | 3.80        |
| 5c  | 0.0706 | 23 | 0.00196 | 6  | 1.46718 | 1.88677 | 10 | 0.280535 | 43 | 0.280397 | -0.8  | 1.5 | 3.90 | 3645 | 20        | -0.3    | 3.89        |
| 6c  | 0.0411 | 51 | 0.00109 | 10 | 1.46723 | 1.88670 | 7  | 0.280754 | 48 | 0.280689 | -3.6  | 1.7 | 3.62 | 3089 | 21        | ** -0.6 | <b>3.56</b> |
| 6c  | 0.0370 | 31 | 0.00095 | 6  | 1.46723 | 1.88664 | 9  | 0.280798 | 44 | 0.280740 | -0.9  | 1.6 | 3.50 | 3128 | 20        | *-1.0   | <b>3.50</b> |
| 7c  | 0.0322 | 5  | 0.00091 | 2  | 1.46715 | 1.88654 | 8  | 0.280842 | 42 | 0.280787 | 0.7   | 1.5 | 3.41 | 3124 | 13        | *0.6    | <b>3.41</b> |
| 8c  | 0.0578 | 11 | 0.00165 | 3  | 1.46716 | 1.88666 | 9  | 0.280799 | 47 | 0.280698 | -1.2  | 1.7 | 3.56 | 3177 | 34        | ** -0.2 | <b>3.54</b> |
| 9c  | 0.0733 | 56 | 0.00187 | 11 | 1.46706 | 1.88654 | 8  | 0.280445 | 44 | 0.280314 | -3.9  | 1.6 | 4.06 | 3638 | 13        | -3.3    | 4.05        |
| 9c  | 0.0973 | 17 | 0.00255 | 2  | 1.46709 | 1.88649 | 9  | 0.280521 | 44 | 0.280342 | -2.6  | 1.6 | 4.00 | 3652 | 15        | -2.3    | 4.00        |
| 10c | 0.0807 | 17 | 0.00204 | 7  | 1.46713 | 1.88654 | 8  | 0.280493 | 42 | 0.280348 | -2.0  | 1.5 | 3.98 | 3665 | 12        | -2.0    | 3.98        |
| 10r | 0.0477 | 5  | 0.00137 | 2  | 1.46713 | 1.88654 | 11 | 0.280488 | 47 | 0.280405 | -11.8 | 1.7 | 4.13 | 3173 | 19        | -0.5    | 3.90        |
| 11c | 0.0412 | 35 | 0.00098 | 6  | 1.46708 | 1.88654 | 9  | 0.280802 | 42 | 0.280746 | -4.5  | 1.5 | 3.57 | 2965 | 35        | *-0.9   | <b>3.50</b> |
| 13c | 0.0592 | 33 | 0.00134 | 10 | 1.46719 | 1.88656 | 11 | 0.280769 | 45 | 0.280685 | -0.3  | 1.6 | 3.55 | 3233 | 16        | ** -0.6 | <b>3.56</b> |
| 14c | 0.0949 | 26 | 0.00269 | 4  | 1.46715 | 1.88667 | 10 | 0.280511 | 45 | 0.280320 | -3.0  | 1.6 | 4.04 | 3665 | 12        | -3.0    | 4.04        |
| 14r | 0.0706 | 8  | 0.00248 | 6  | 1.46713 | 1.88664 | 12 | 0.280527 | 42 | 0.280375 | -12.3 | 1.5 | 4.18 | 3193 | 40        | -1.9    | 3.97        |
| 15c | 0.0538 | 59 | 0.00139 | 10 | 1.46709 | 1.88664 | 10 | 0.280457 | 43 | 0.280359 | -2.5  | 1.5 | 3.98 | 3630 | 29        | -1.7    | 3.96        |
| 15c | 0.0953 | 40 | 0.00239 | 9  | 1.46706 | 1.88667 | 9  | 0.280503 | 44 | 0.280339 | -4.7  | 1.6 | 4.05 | 3568 | 38        | -2.6    | 4.01        |
| 16c | 0.0716 | 25 | 0.00194 | 4  | 1.46719 | 1.88666 | 10 | 0.280519 | 44 | 0.280389 | -5.3  | 1.6 | 4.01 | 3468 | 33        | -0.9    | 3.92        |
| 17c | 0.0859 | 26 | 0.00232 | 5  | 1.46716 | 1.88665 | 9  | 0.280547 | 44 | 0.280383 | -0.5  | 1.6 | 3.91 | 3677 | 17        | -0.8    | 3.91        |
| 18c | 0.0392 | 25 | 0.00104 | 5  | 1.46717 | 1.88664 | 9  | 0.280448 | 42 | 0.280375 | -1.3  | 1.5 | 3.93 | 3657 | 20        | -1.1    | 3.93        |
| 18c | 0.0914 | 21 | 0.00230 | 7  | 1.46712 | 1.88657 | 8  | 0.280507 | 44 | 0.280343 | -1.4  | 1.6 | 3.97 | 3699 | 14        | -2.2    | 3.99        |
| 18r | 0.0534 | 13 | 0.00177 | 4  | 1.46710 | 1.88654 | 12 | 0.280542 | 42 | 0.280431 | -8.1  | 1.5 | 4.02 | 3286 | 42        | 0.4     | 3.85        |
| 19c | 0.0878 | 25 | 0.00226 | 8  | 1.46725 | 1.88661 | 9  | 0.280525 | 42 | 0.280364 | -1.1  | 1.5 | 3.94 | 3682 | 14        | -1.4    | 3.95        |
| 20c | 0.0405 | 12 | 0.00107 | 3  | 1.46708 | 1.88660 | 9  | 0.280851 | 44 | 0.280787 | 0.8   | 1.6 | 3.41 | 3129 | 22        | *0.6    | <b>3.41</b> |
| 20c | 0.0375 | 16 | 0.00096 | 3  | 1.46715 | 1.88657 | 9  | 0.280845 | 45 | 0.280787 | 1.6   | 1.6 | 3.39 | 3162 | 18        | *0.6    | <b>3.41</b> |
| 21r | 0.0186 | 12 | 0.00046 | 3  | 1.46712 | 1.88662 | 13 | 0.280725 | 41 | 0.280700 | -9.7  | 1.5 | 3.74 | 2813 | 27        | ** -0.2 | <b>3.54</b> |
| 22c | 0.0920 | 38 | 0.00233 | 8  | 1.46717 | 1.88666 | 10 | 0.280515 | 42 | 0.280361 | -6.8  | 1.5 | 4.07 | 3447 | 22        | -2.0    | 3.98        |
| 23c | 0.0459 | 9  | 0.00121 | 3  | 1.46718 | 1.88659 | 8  | 0.280820 | 46 | 0.280747 | -0.7  | 1.6 | 3.49 | 3125 | 24        | *-0.8   | <b>3.49</b> |

|     |        |    |         |    |         |         |   |          |    |          |      |     |      |      |    |       |             |
|-----|--------|----|---------|----|---------|---------|---|----------|----|----------|------|-----|------|------|----|-------|-------------|
| 24c | 0.0684 | 19 | 0.00191 | 5  | 1.46706 | 1.88661 | 8 | 0.280536 | 45 | 0.280402 | -0.6 | 1.6 | 3.89 | 3644 | 29 | -0.2  | 3.88        |
| 25c | 0.0251 | 10 | 0.00073 | 2  | 1.46711 | 1.88658 | 6 | 0.280789 | 43 | 0.280743 | 2.6  | 1.5 | 3.42 | 3269 | 21 | *-0.9 | <b>3.49</b> |
| 25c | 0.0317 | 9  | 0.00092 | 5  | 1.46714 | 1.88669 | 7 | 0.280825 | 45 | 0.280770 | 0.2  | 1.6 | 3.44 | 3126 | 13 | *0.0  | <b>3.44</b> |
| 27r | 0.0535 | 21 | 0.00183 | 10 | 1.46714 | 1.88655 | 6 | 0.280569 | 52 | 0.280443 | -0.8 | 1.8 | 3.84 | 3576 | 20 | 1.2   | 3.80        |
|     |        |    |         |    |         |         |   |          |    |          |      |     |      |      |    | mean  | 3.94        |
|     |        |    |         |    |         |         |   |          |    |          |      |     |      |      |    | 2sd   | 0.15        |

**sample AG6a**

|     |        |    |         |   |         |         |   |          |    |          |       |     |      |      |    |                 |             |
|-----|--------|----|---------|---|---------|---------|---|----------|----|----------|-------|-----|------|------|----|-----------------|-------------|
|     |        |    |         |   |         |         |   |          |    |          |       |     |      |      |    | <b>3221 Ma</b>  |             |
|     |        |    |         |   |         |         |   |          |    |          |       |     |      |      |    | <b>*3650 Ma</b> |             |
| 1c  | 0.0140 | 3  | 0.00038 | 1 | 1.46717 | 1.88668 | 6 | 0.280728 | 44 | 0.280704 | -0.8  | 1.6 | 3.54 | 3183 | 16 | 0.1             | 3.52        |
| 2c  | 0.0301 | 9  | 0.00068 | 1 | 1.46707 | 1.88657 | 5 | 0.280531 | 45 | 0.280485 | -0.6  | 1.6 | 3.79 | 3520 | 24 | *2.8            | <b>3.72</b> |
| 2r  | 0.0167 | 4  | 0.00049 | 1 | 1.46712 | 1.88658 | 7 | 0.280760 | 44 | 0.280730 | 0.3   | 1.6 | 3.49 | 3191 | 21 | 1.0             | 3.47        |
| 4c  | 0.0208 | 13 | 0.00066 | 4 | 1.46716 | 1.88661 | 7 | 0.280710 | 44 | 0.280669 | -1.6  | 1.6 | 3.60 | 3203 | 16 | -1.2            | 3.59        |
| 6c  | 0.0395 | 6  | 0.00108 | 1 | 1.46717 | 1.88654 | 6 | 0.280748 | 45 | 0.280704 | -25.5 | 1.6 | 4.06 | 2129 | 22 | -0.8            | 3.57        |
| 7c  | 0.0319 | 12 | 0.00095 | 6 | 1.46713 | 1.88670 | 9 | 0.280714 | 44 | 0.280666 | -14.2 | 1.6 | 3.88 | 2673 | 67 | -1.7            | 3.62        |
| 8c  | 0.0069 | 3  | 0.00017 | 1 | 1.46712 | 1.88659 | 5 | 0.280694 | 43 | 0.280684 | -2.0  | 1.5 | 3.59 | 3163 | 23 | -0.7            | 3.56        |
| 9c  | 0.0044 | 7  | 0.00008 | 2 | 1.46714 | 1.88669 | 4 | 0.280688 | 43 | 0.280683 | -0.5  | 1.5 | 3.56 | 3231 | 22 | -0.7            | 3.56        |
| 9c  | 0.0053 | 6  | 0.00010 | 1 | 1.46709 | 1.88670 | 5 | 0.280675 | 46 | 0.280668 | -1.2  | 1.6 | 3.59 | 3221 | 23 | -1.2            | 3.59        |
| 10c | 0.0102 | 5  | 0.00021 | 1 | 1.46707 | 1.88669 | 7 | 0.280738 | 41 | 0.280725 | 0.9   | 1.5 | 3.48 | 3227 | 26 | 0.8             | 3.48        |
| 11c | 0.0522 | 39 | 0.00111 | 5 | 1.46710 | 1.88665 | 6 | 0.280616 | 45 | 0.280542 | -0.5  | 1.6 | 3.72 | 3439 | 31 | *4.7            | <b>3.62</b> |
| 12c | 0.0079 | 3  | 0.00016 | 1 | 1.46709 | 1.88655 | 6 | 0.280734 | 45 | 0.280723 | 1.1   | 1.6 | 3.48 | 3235 | 29 | 0.7             | 3.48        |
| 15c | 0.0312 | 12 | 0.00084 | 4 | 1.46719 | 1.88665 | 7 | 0.280612 | 46 | 0.280558 | -2.5  | 1.7 | 3.75 | 3334 | 27 | *5.2            | <b>3.59</b> |
| 16c | 0.0109 | 3  | 0.00018 | 1 | 1.46705 | 1.88655 | 5 | 0.280759 | 44 | 0.280748 | -0.8  | 1.6 | 3.49 | 3118 | 19 | 1.6             | 3.44        |
| 17c | 0.0346 | 34 | 0.00084 | 8 | 1.46710 | 1.88663 | 7 | 0.280715 | 46 | 0.280663 | -1.6  | 1.6 | 3.61 | 3211 | 27 | -1.4            | 3.60        |
| 18c | 0.0131 | 7  | 0.00046 | 2 | 1.46716 | 1.88652 | 7 | 0.280721 | 41 | 0.280693 | -1.6  | 1.5 | 3.57 | 3168 | 54 | -0.4            | 3.54        |
|     |        |    |         |   |         |         |   |          |    |          |       |     |      |      |    | mean            | 3.54        |
|     |        |    |         |   |         |         |   |          |    |          |       |     |      |      |    | 2sd             | 0.11        |

**sample AG6b**

|    |        |    |         |    |         |         |    |          |    |          |       |     |      |      |    |                 |             |
|----|--------|----|---------|----|---------|---------|----|----------|----|----------|-------|-----|------|------|----|-----------------|-------------|
|    |        |    |         |    |         |         |    |          |    |          |       |     |      |      |    | <b>3230 Ma</b>  |             |
|    |        |    |         |    |         |         |    |          |    |          |       |     |      |      |    | <b>*3650 Ma</b> |             |
| 1c | 0.0897 | 38 | 0.00234 | 10 | 1.46713 | 1.88663 | 7  | 0.280529 | 50 | 0.280364 | -1.9  | 1.8 | 3.96 | 3650 | 10 | *-1.9           | <b>3.96</b> |
| 2c | 0.1768 | 80 | 0.00522 | 22 | 1.46720 | 1.88667 | 12 | 0.281024 | 47 | 0.280738 | -7.3  | 1.7 | 3.64 | 2857 | 22 | 0.1             | 3.52        |
| 3c | 0.1836 | 60 | 0.00529 | 18 | 1.46715 | 1.88669 | 5  | 0.281007 | 50 | 0.280679 | -0.6  | 1.8 | 3.57 | 3232 | 26 | -0.6            | 3.57        |
| 4c | 0.0347 | 15 | 0.00102 | 3  | 1.46717 | 1.88670 | 8  | 0.280576 | 43 | 0.280510 | -3.6  | 1.5 | 3.83 | 3360 | 29 | *3.2            | <b>3.68</b> |
| 4r | 0.0288 | 8  | 0.00084 | 2  | 1.46723 | 1.88659 | 8  | 0.280684 | 41 | 0.280633 | -4.0  | 1.5 | 3.69 | 3156 | 35 | -2.3            | 3.66        |
| 5c | 0.0599 | 39 | 0.00168 | 10 | 1.46723 | 1.88656 | 16 | 0.280848 | 43 | 0.280744 | 1.1   | 1.5 | 3.45 | 3203 | 30 | 1.7             | 3.44        |
| 6c | 0.0561 | 46 | 0.00144 | 11 | 1.46722 | 1.88655 | 17 | 0.280801 | 42 | 0.280711 | 0.8   | 1.5 | 3.50 | 3242 | 35 | 0.5             | 3.50        |
| 7c | 0.0252 | 7  | 0.00079 | 2  | 1.46721 | 1.88669 | 10 | 0.280465 | 44 | 0.280416 | -10.4 | 1.6 | 4.09 | 3212 | 25 | *-0.2           | <b>3.87</b> |

|                    |        |    |         |    |         |         |    |          |    |          |       |     |      |      |    |                |                 |
|--------------------|--------|----|---------|----|---------|---------|----|----------|----|----------|-------|-----|------|------|----|----------------|-----------------|
| 8c                 | 0.0323 | 53 | 0.00087 | 13 | 1.46709 | 1.88661 | 6  | 0.280731 | 43 | 0.280676 | -0.8  | 1.5 | 3.57 | 3224 | 20 | -0.7           | 3.57            |
| 9c                 | 0.0189 | 27 | 0.00050 | 6  | 1.46706 | 1.88658 | 15 | 0.280730 | 42 | 0.280698 | 0.3   | 1.5 | 3.52 | 3239 | 18 | 0.1            | 3.53            |
| 9c                 | 0.0190 | 6  | 0.00053 | 2  | 1.46717 | 1.88652 | 15 | 0.280756 | 42 | 0.280724 | 0.7   | 1.5 | 3.48 | 3218 | 29 | 1.0            | 3.48            |
| 10c                | 0.0798 | 58 | 0.00208 | 11 | 1.46720 | 1.88656 | 13 | 0.280849 | 44 | 0.280721 | 0.2   | 1.6 | 3.50 | 3202 | 14 | 0.8            | 3.48            |
| 13r                | 0.0417 | 15 | 0.00096 | 3  | 1.46715 | 1.88663 | 8  | 0.280752 | 43 | 0.280693 | -1.9  | 1.5 | 3.58 | 3154 | 21 | -0.2           | 3.54            |
| 16c                | 0.0619 | 5  | 0.00154 | 1  | 1.46705 | 1.88655 | 7  | 0.280741 | 49 | 0.280680 | -27.6 | 1.7 | 4.13 | 2077 | 87 | -1.8           | 3.63            |
| 20c                | 0.0289 | 9  | 0.00089 | 4  | 1.46709 | 1.88669 | 6  | 0.280721 | 45 | 0.280666 | -1.1  | 1.6 | 3.59 | 3231 | 27 | -1.1           | 3.59            |
| 26c                | 0.0598 | 40 | 0.00139 | 8  | 1.46720 | 1.88665 | 9  | 0.280537 | 48 | 0.280442 | -1.2  | 1.7 | 3.85 | 3560 | 31 | *0.8           | <b>3.81</b>     |
| 29c                | 0.0955 | 25 | 0.00225 | 7  | 1.46712 | 1.88655 | 19 | 0.280575 | 47 | 0.280423 | -3.0  | 1.7 | 3.92 | 3513 | 23 | *0.0           | <b>3.85</b>     |
| 32c                | 0.0257 | 64 | 0.00055 | 12 | 1.46712 | 1.88659 | 8  | 0.280740 | 44 | 0.280707 | -0.9  | 1.6 | 3.54 | 3176 | 31 | 0.4            | 3.51            |
|                    |        |    |         |    |         |         |    |          |    |          |       |     |      |      |    | mean           | 3.54            |
|                    |        |    |         |    |         |         |    |          |    |          |       |     |      |      |    | 2sd            | 0.13            |
| <b>sample SW26</b> |        |    |         |    |         |         |    |          |    |          |       |     |      |      |    | <b>3539 Ma</b> |                 |
| 3c                 | 0.0661 | 25 | 0.00178 | 9  | 1.46710 | 1.88653 | 9  | 0.280637 | 44 | 0.280515 | 0.9   | 1.6 | 3.72 | 3541 | 16 | 0.9            | 3.72            |
| 5c                 | 0.1398 | 44 | 0.00387 | 15 | 1.46708 | 1.88673 | 10 | 0.280797 | 47 | 0.280585 | -12.5 | 1.7 | 3.94 | 2868 | 22 | 1.5            | 3.69            |
| 9c                 | 0.0660 | 8  | 0.00192 | 5  | 1.46712 | 1.88654 | 8  | 0.280689 | 43 | 0.280563 | -0.8  | 1.5 | 3.71 | 3396 | 12 | 2.4            | 3.64            |
| 9c                 | 0.0701 | 17 | 0.00198 | 7  | 1.46708 | 1.88657 | 9  | 0.280668 | 46 | 0.280533 | 1.5   | 1.6 | 3.69 | 3539 | 10 | 1.5            | 3.69            |
|                    |        |    |         |    |         |         |    |          |    |          |       |     |      |      |    | mean           | 3.68            |
|                    |        |    |         |    |         |         |    |          |    |          |       |     |      |      |    | 2sd            | 0.07            |
| <b>sample DA16</b> |        |    |         |    |         |         |    |          |    |          |       |     |      |      |    | <b>3206 Ma</b> |                 |
|                    |        |    |         |    |         |         |    |          |    |          |       |     |      |      |    |                | <b>*3433 Ma</b> |
| 1c                 | 0.0091 | 4  | 0.00020 | 1  | 1.46718 | 1.88652 | 8  | 0.280730 | 42 | 0.280718 | 0.4   | 1.5 | 3.50 | 3214 | 24 | 0.2            | 3.50            |
| 2c                 | 0.0134 | 9  | 0.00030 | 2  | 1.46706 | 1.88653 | 9  | 0.280710 | 42 | 0.280692 | -2.6  | 1.5 | 3.59 | 3129 | 29 | -0.7           | 3.55            |
| 3c                 | 0.0117 | 11 | 0.00028 | 3  | 1.46707 | 1.88655 | 9  | 0.280710 | 42 | 0.280693 | -1.0  | 1.5 | 3.56 | 3192 | 37 | -0.7           | 3.55            |
| 4c                 | 0.0193 | 12 | 0.00047 | 3  | 1.46723 | 1.88661 | 9  | 0.280703 | 44 | 0.280674 | -1.4  | 1.6 | 3.59 | 3207 | 15 | -1.4           | 3.59            |
| 5c                 | 0.0194 | 14 | 0.00057 | 3  | 1.46721 | 1.88656 | 9  | 0.280713 | 46 | 0.280678 | -1.4  | 1.6 | 3.58 | 3199 | 18 | -1.2           | 3.58            |
| 6c                 | 0.0117 | 4  | 0.00030 | 1  | 1.46718 | 1.88654 | 9  | 0.280713 | 43 | 0.280694 | -0.9  | 1.5 | 3.55 | 3195 | 18 | -0.7           | 3.55            |
| 7c                 | 0.0125 | 4  | 0.00034 | 1  | 1.46711 | 1.88654 | 8  | 0.280714 | 41 | 0.280694 | -0.6  | 1.5 | 3.55 | 3208 | 23 | -0.7           | 3.55            |
| 8c-old             | 0.0247 | 14 | 0.00070 | 5  | 1.46718 | 1.88653 | 8  | 0.280436 | 44 | 0.280390 | -6.3  | 1.6 | 4.03 | 3426 | 38 | *-6.1          | <b>4.02</b>     |
| 8r                 | 0.0162 | 8  | 0.00042 | 2  | 1.46714 | 1.88664 | 9  | 0.280689 | 42 | 0.280665 | -6.5  | 1.5 | 3.71 | 3002 | 47 | -1.7           | 3.61            |
| 9c                 | 0.0567 | 19 | 0.00148 | 6  | 1.46714 | 1.88673 | 7  | 0.280619 | 45 | 0.280527 | -6.3  | 1.6 | 3.87 | 3218 | 26 | *-1.4          | <b>3.77</b>     |
| 10c                | 0.0110 | 12 | 0.00022 | 2  | 1.46706 | 1.88654 | 8  | 0.280682 | 44 | 0.280668 | -1.5  | 1.6 | 3.60 | 3209 | 22 | -1.6           | 3.60            |
| 11c-old            | 0.0437 | 40 | 0.00117 | 9  | 1.46718 | 1.88662 | 8  | 0.280632 | 46 | 0.280555 | 0.1   | 1.6 | 3.69 | 3448 | 41 | *-0.2          | <b>3.70</b>     |
| 12c                | 0.0248 | 3  | 0.00066 | 1  | 1.46722 | 1.88663 | 8  | 0.280551 | 44 | 0.280511 | -7.9  | 1.6 | 3.92 | 3177 | 19 | *-1.9          | <b>3.79</b>     |
| 12r                | 0.0233 | 5  | 0.00062 | 1  | 1.46710 | 1.88671 | 8  | 0.280578 | 43 | 0.280539 | -6.2  | 1.5 | 3.85 | 3203 | 15 | *-0.8          | <b>3.74</b>     |
| 13c                | 0.0332 | 8  | 0.00083 | 2  | 1.46719 | 1.88651 | 9  | 0.280644 | 43 | 0.280597 | -10.6 | 1.5 | 3.88 | 2931 | 22 | *1.0           | <b>3.63</b>     |

|     |        |    |         |   |         |         |    |          |    |          |      |     |      |      |    |      |      |
|-----|--------|----|---------|---|---------|---------|----|----------|----|----------|------|-----|------|------|----|------|------|
| 14c | 0.0100 | 5  | 0.00030 | 1 | 1.46712 | 1.88654 | 10 | 0.280689 | 42 | 0.280671 | -1.5 | 1.5 | 3.59 | 3204 | 46 | -1.5 | 3.59 |
| 15c | 0.0228 | 18 | 0.00061 | 3 | 1.46714 | 1.88655 | 8  | 0.280718 | 42 | 0.280680 | -1.4 | 1.5 | 3.58 | 3197 | 18 | -1.2 | 3.58 |
| 16c | 0.0195 | 17 | 0.00040 | 2 | 1.46712 | 1.88669 | 8  | 0.280738 | 42 | 0.280714 | -0.7 | 1.5 | 3.53 | 3172 | 37 | 0.1  | 3.51 |
| 17c | 0.0107 | 14 | 0.00027 | 3 | 1.46710 | 1.88654 | 9  | 0.280702 | 40 | 0.280685 | -0.9 | 1.4 | 3.56 | 3207 | 22 | -1.0 | 3.57 |
| 19c | 0.0111 | 12 | 0.00032 | 3 | 1.46717 | 1.88665 | 10 | 0.280705 | 42 | 0.280686 | -2.8 | 1.5 | 3.61 | 3129 | 18 | -1.0 | 3.57 |
| 20c | 0.0092 | 4  | 0.00029 | 2 | 1.46715 | 1.88650 | 9  | 0.280708 | 42 | 0.280690 | -0.8 | 1.5 | 3.56 | 3204 | 21 | -0.8 | 3.56 |
| 21c | 0.0115 | 4  | 0.00026 | 1 | 1.46713 | 1.88650 | 9  | 0.280701 | 42 | 0.280685 | -0.8 | 1.5 | 3.56 | 3212 | 38 | -1.0 | 3.57 |
| 22c | 0.0056 | 3  | 0.00014 | 1 | 1.46719 | 1.88661 | 10 | 0.280685 | 43 | 0.280676 | -1.0 | 1.5 | 3.58 | 3217 | 20 | -1.3 | 3.58 |
| 23c | 0.0073 | 4  | 0.00019 | 1 | 1.46718 | 1.88654 | 9  | 0.280710 | 42 | 0.280699 | -0.5 | 1.5 | 3.54 | 3206 | 35 | -0.5 | 3.54 |
| 23c | 0.0061 | 5  | 0.00016 | 1 | 1.46713 | 1.88651 | 9  | 0.280695 | 44 | 0.280686 | -0.4 | 1.6 | 3.55 | 3230 | 25 | -1.0 | 3.57 |

---

mean 3.56

2sd 0.06

**sample DA17**

|     |        |    |         |   |         |         |    |          |    |          |      |     |      |      |    |     |      |
|-----|--------|----|---------|---|---------|---------|----|----------|----|----------|------|-----|------|------|----|-----|------|
| 1c  | 0.0204 | 6  | 0.00053 | 1 | 1.46715 | 1.88660 | 7  | 0.280600 | 45 | 0.280565 | 0.5  | 1.6 | 3.67 | 3447 | 28 | 0.7 | 3.67 |
| 2c  | 0.0420 | 22 | 0.00113 | 5 | 1.46720 | 1.88666 | 6  | 0.280652 | 48 | 0.280577 | 1.2  | 1.7 | 3.64 | 3460 | 44 | 1.1 | 3.65 |
| 3c  | 0.0361 | 16 | 0.00103 | 2 | 1.46721 | 1.88654 | 5  | 0.280639 | 50 | 0.280570 | 1.2  | 1.8 | 3.65 | 3468 | 19 | 0.9 | 3.66 |
| 4c  | 0.0119 | 9  | 0.00038 | 1 | 1.46722 | 1.88655 | 13 | 0.280599 | 40 | 0.280574 | 0.7  | 1.4 | 3.66 | 3445 | 35 | 1.0 | 3.65 |
| 4c  | 0.0107 | 4  | 0.00035 | 1 | 1.46715 | 1.88660 | 14 | 0.280581 | 39 | 0.280558 | 0.2  | 1.4 | 3.69 | 3447 | 20 | 0.4 | 3.68 |
| 5c  | 0.0306 | 5  | 0.00091 | 2 | 1.46713 | 1.88654 | 11 | 0.280668 | 44 | 0.280607 | 2.1  | 1.6 | 3.59 | 3452 | 21 | 2.2 | 3.58 |
| 6c  | 0.0151 | 3  | 0.00044 | 1 | 1.46714 | 1.88660 | 12 | 0.280590 | 39 | 0.280561 | -0.2 | 1.4 | 3.69 | 3424 | 37 | 0.5 | 3.68 |
| 8c  | 0.0212 | 5  | 0.00060 | 1 | 1.46712 | 1.88657 | 14 | 0.280627 | 41 | 0.280587 | 1.2  | 1.5 | 3.63 | 3445 | 27 | 1.5 | 3.63 |
| 9c  | 0.0306 | 12 | 0.00083 | 2 | 1.46713 | 1.88666 | 13 | 0.280643 | 42 | 0.280587 | 1.8  | 1.5 | 3.62 | 3468 | 20 | 1.5 | 3.62 |
| 10c | 0.0296 | 8  | 0.00082 | 2 | 1.46716 | 1.88655 | 14 | 0.280634 | 42 | 0.280579 | 1.3  | 1.5 | 3.64 | 3461 | 20 | 1.2 | 3.64 |
| 11c | 0.0313 | 3  | 0.00086 | 1 | 1.46713 | 1.88671 | 12 | 0.280630 | 39 | 0.280573 | 0.8  | 1.4 | 3.66 | 3448 | 24 | 1.0 | 3.65 |
| 12c | 0.0321 | 10 | 0.00098 | 4 | 1.46715 | 1.88654 | 6  | 0.280645 | 44 | 0.280580 | 1.2  | 1.6 | 3.64 | 3456 | 8  | 1.2 | 3.64 |
| 13c | 0.0319 | 15 | 0.00086 | 3 | 1.46708 | 1.88664 | 5  | 0.280645 | 51 | 0.280587 | 1.9  | 1.8 | 3.61 | 3474 | 26 | 1.5 | 3.62 |
| 14c | 0.0328 | 15 | 0.00098 | 3 | 1.46709 | 1.88663 | 7  | 0.280625 | 46 | 0.280560 | 0.7  | 1.6 | 3.67 | 3464 | 27 | 0.5 | 3.68 |
| 14r | 0.0089 | 1  | 0.00031 | 0 | 1.46709 | 1.88668 | 9  | 0.280589 | 41 | 0.280569 | 1.0  | 1.5 | 3.66 | 3464 | 17 | 0.8 | 3.66 |
| 15c | 0.0421 | 13 | 0.00103 | 5 | 1.46712 | 1.88667 | 6  | 0.280679 | 46 | 0.280611 | 2.4  | 1.6 | 3.58 | 3457 | 31 | 2.3 | 3.58 |
| 15r | 0.0338 | 3  | 0.00093 | 1 | 1.46712 | 1.88651 | 14 | 0.280638 | 39 | 0.280576 | 0.9  | 1.4 | 3.65 | 3447 | 32 | 1.1 | 3.65 |
| 16c | 0.0133 | 3  | 0.00050 | 2 | 1.46713 | 1.88665 | 16 | 0.280586 | 41 | 0.280553 | 0.4  | 1.4 | 3.69 | 3461 | 24 | 0.3 | 3.69 |
| 17c | 0.0094 | 2  | 0.00038 | 1 | 1.46714 | 1.88659 | 20 | 0.280597 | 39 | 0.280571 | 1.6  | 1.4 | 3.64 | 3484 | 25 | 0.9 | 3.66 |
| 18c | 0.0311 | 14 | 0.00085 | 3 | 1.46717 | 1.88651 | 14 | 0.280640 | 40 | 0.280583 | 1.4  | 1.4 | 3.63 | 3460 | 32 | 1.3 | 3.63 |
| 19c | 0.0152 | 5  | 0.00043 | 1 | 1.46724 | 1.88666 | 14 | 0.280593 | 40 | 0.280565 | 0.7  | 1.4 | 3.67 | 3456 | 8  | 0.7 | 3.67 |
| 20c | 0.0367 | 5  | 0.00100 | 2 | 1.46709 | 1.88645 | 15 | 0.280653 | 40 | 0.280587 | 1.5  | 1.4 | 3.62 | 3458 | 35 | 1.5 | 3.63 |
| 21c | 0.0177 | 2  | 0.00048 | 1 | 1.46711 | 1.88650 | 15 | 0.280612 | 39 | 0.280580 | 1.5  | 1.4 | 3.63 | 3468 | 56 | 1.2 | 3.64 |

**3456 Ma**

|     |        |    |         |   |         |         |    |          |    |          |     |     |      |      |    |      |      |
|-----|--------|----|---------|---|---------|---------|----|----------|----|----------|-----|-----|------|------|----|------|------|
| 22c | 0.0261 | 16 | 0.00073 | 3 | 1.46723 | 1.88663 | 15 | 0.280622 | 41 | 0.280573 | 0.5 | 1.4 | 3.66 | 3437 | 33 | 1.0  | 3.65 |
| 23c | 0.0174 | 7  | 0.00048 | 1 | 1.46715 | 1.88670 | 16 | 0.280610 | 39 | 0.280578 | 1.4 | 1.4 | 3.64 | 3465 | 16 | 1.2  | 3.64 |
| 24c | 0.0140 | 2  | 0.00039 | 0 | 1.46720 | 1.88652 | 17 | 0.280598 | 39 | 0.280572 | 0.1 | 1.4 | 3.67 | 3418 | 13 | 0.9  | 3.65 |
| 24c | 0.0241 | 3  | 0.00067 | 1 | 1.46713 | 1.88654 | 5  | 0.280613 | 51 | 0.280569 | 0.5 | 1.8 | 3.67 | 3443 | 43 | 0.8  | 3.66 |
|     |        |    |         |   |         |         |    |          |    |          |     |     |      |      |    | mean | 3.65 |
|     |        |    |         |   |         |         |    |          |    |          |     |     |      |      |    | 2sd  | 0.05 |

**sample DA18**

|     |        |    |         |    |         |         |    |          |    |          |       |     |      |      |    |      |      |
|-----|--------|----|---------|----|---------|---------|----|----------|----|----------|-------|-----|------|------|----|------|------|
| 1c  | 0.0375 | 28 | 0.00098 | 5  | 1.46710 | 1.88645 | 6  | 0.280659 | 48 | 0.280594 | 1.3   | 1.7 | 3.62 | 3436 | 8  | 1.3  | 3.62 |
| 3c  | 0.0349 | 27 | 0.00096 | 8  | 1.46724 | 1.88672 | 7  | 0.280661 | 49 | 0.280597 | 1.4   | 1.8 | 3.62 | 3436 | 33 | 1.4  | 3.62 |
| 3r  | 0.0237 | 12 | 0.00068 | 2  | 1.46712 | 1.88665 | 7  | 0.280674 | 44 | 0.280629 | 2.3   | 1.6 | 3.56 | 3428 | 22 | 2.5  | 3.55 |
| 4c  | 0.0447 | 27 | 0.00122 | 8  | 1.46716 | 1.88663 | 6  | 0.280662 | 44 | 0.280581 | 0.8   | 1.6 | 3.65 | 3436 | 8  | 0.8  | 3.65 |
| 5c  | 0.0449 | 26 | 0.00121 | 3  | 1.46708 | 1.88661 | 6  | 0.280685 | 45 | 0.280606 | 0.7   | 1.6 | 3.62 | 3396 | 21 | 1.6  | 3.60 |
| 6c  | 0.0412 | 5  | 0.00117 | 1  | 1.46722 | 1.88659 | 17 | 0.280693 | 42 | 0.280619 | -2.3  | 1.5 | 3.67 | 3247 | 28 | 2.0  | 3.58 |
| 8c  | 0.0312 | 7  | 0.00087 | 1  | 1.46714 | 1.88667 | 6  | 0.280662 | 48 | 0.280605 | 0.8   | 1.7 | 3.62 | 3401 | 34 | 1.6  | 3.60 |
| 9c  | 0.0360 | 7  | 0.00101 | 1  | 1.46721 | 1.88658 | 7  | 0.280700 | 44 | 0.280632 | 2.5   | 1.6 | 3.55 | 3431 | 21 | 2.6  | 3.55 |
| 10c | 0.0748 | 51 | 0.00213 | 12 | 1.46711 | 1.88654 | 6  | 0.280698 | 49 | 0.280557 | -0.7  | 1.8 | 3.71 | 3407 | 39 | -0.1 | 3.70 |
| 11c | 0.0367 | 7  | 0.00099 | 3  | 1.46709 | 1.88662 | 6  | 0.280670 | 45 | 0.280605 | 1.9   | 1.6 | 3.60 | 3446 | 29 | 1.6  | 3.60 |
| 12r | 0.0235 | 6  | 0.00095 | 3  | 1.46717 | 1.88654 | 9  | 0.280689 | 51 | 0.280631 | -3.2  | 1.8 | 3.68 | 3192 | 36 | 2.4  | 3.56 |
| 13r | 0.0217 | 5  | 0.00061 | 2  | 1.46716 | 1.88674 | 6  | 0.280615 | 45 | 0.280575 | 0.7   | 1.6 | 3.66 | 3442 | 23 | 0.6  | 3.66 |
| 14c | 0.0297 | 8  | 0.00082 | 2  | 1.46714 | 1.88662 | 6  | 0.280657 | 45 | 0.280604 | 0.1   | 1.6 | 3.64 | 3374 | 28 | 1.6  | 3.60 |
| 13c | 0.0333 | 19 | 0.00089 | 4  | 1.46724 | 1.88672 | 14 | 0.280647 | 43 | 0.280588 | 1.2   | 1.5 | 3.63 | 3441 | 29 | 1.0  | 3.63 |
| 13r | 0.0167 | 3  | 0.00048 | 1  | 1.46720 | 1.88670 | 7  | 0.280588 | 45 | 0.280556 | 0.2   | 1.6 | 3.69 | 3450 | 23 | -0.1 | 3.70 |
| 14c | 0.0218 | 5  | 0.00060 | 0  | 1.46721 | 1.88658 | 16 | 0.280600 | 44 | 0.280560 | 0.3   | 1.6 | 3.68 | 3448 | 54 | 0.1  | 3.69 |
| 15c | 0.0406 | 14 | 0.00107 | 2  | 1.46723 | 1.88662 | 15 | 0.280686 | 42 | 0.280616 | 1.9   | 1.5 | 3.58 | 3429 | 23 | 2.0  | 3.58 |
| 16c | 0.0355 | 11 | 0.00099 | 2  | 1.46708 | 1.88644 | 17 | 0.280659 | 43 | 0.280594 | 0.9   | 1.5 | 3.63 | 3422 | 24 | 1.2  | 3.62 |
| 17c | 0.0402 | 3  | 0.00108 | 2  | 1.46709 | 1.88658 | 16 | 0.280677 | 43 | 0.280605 | 2.0   | 1.5 | 3.59 | 3452 | 30 | 1.7  | 3.60 |
| 18c | 0.0276 | 8  | 0.00077 | 1  | 1.46725 | 1.88658 | 17 | 0.280660 | 42 | 0.280609 | 1.8   | 1.5 | 3.59 | 3436 | 34 | 1.8  | 3.59 |
| 19c | 0.0418 | 17 | 0.00116 | 5  | 1.46718 | 1.88664 | 17 | 0.280670 | 42 | 0.280594 | 0.5   | 1.5 | 3.64 | 3405 | 24 | 1.2  | 3.62 |
| 20c | 0.0200 | 6  | 0.00057 | 1  | 1.46717 | 1.88655 | 17 | 0.280642 | 41 | 0.280604 | 1.7   | 1.5 | 3.60 | 3440 | 20 | 1.6  | 3.60 |
| 21c | 0.0380 | 15 | 0.00105 | 5  | 1.46706 | 1.88649 | 6  | 0.280631 | 47 | 0.280561 | 0.2   | 1.7 | 3.68 | 3441 | 21 | 0.1  | 3.69 |
| 22c | 0.0540 | 21 | 0.00151 | 4  | 1.46707 | 1.88653 | 6  | 0.280674 | 46 | 0.280593 | -13.2 | 1.6 | 3.94 | 2828 | 69 | 0.6  | 3.66 |
| 22r | 0.0343 | 10 | 0.00105 | 6  | 1.46714 | 1.88666 | 9  | 0.280640 | 44 | 0.280571 | 0.7   | 1.6 | 3.66 | 3447 | 39 | 0.4  | 3.67 |
| 23c | 0.0368 | 11 | 0.00097 | 3  | 1.46721 | 1.88665 | 15 | 0.280667 | 43 | 0.280602 | 1.3   | 1.5 | 3.61 | 3426 | 30 | 1.5  | 3.61 |
|     |        |    |         |    |         |         |    |          |    |          |       |     |      |      |    | mean | 3.62 |
|     |        |    |         |    |         |         |    |          |    |          |       |     |      |      |    | 2sd  | 0.09 |

**sample MB30**

**3426 Ma**

|     |        |    |         |   |         |         |    |          |    |          |      |     |      |      |    |      |      |
|-----|--------|----|---------|---|---------|---------|----|----------|----|----------|------|-----|------|------|----|------|------|
| 1c  | 0.0633 | 15 | 0.00148 | 3 | 1.46708 | 1.88649 | 7  | 0.280647 | 46 | 0.280548 | 0.0  | 1.7 | 3.70 | 3454 | 21 | -0.4 | 3.72 |
| 2c  | 0.0831 | 13 | 0.00188 | 3 | 1.46723 | 1.88663 | 7  | 0.280735 | 46 | 0.280616 | -1.8 | 1.7 | 3.66 | 3277 | 20 | 1.8  | 3.60 |
| 3c  | 0.0778 | 20 | 0.00194 | 8 | 1.46718 | 1.88667 | 8  | 0.280679 | 46 | 0.280550 | -0.4 | 1.6 | 3.71 | 3431 | 19 | -0.3 | 3.71 |
| 4c  | 0.1310 | 10 | 0.00295 | 4 | 1.46711 | 1.88649 | 18 | 0.280800 | 43 | 0.280604 | 1.7  | 1.5 | 3.60 | 3441 | 21 | 1.6  | 3.61 |
| 13c | 0.1071 | 23 | 0.00264 | 3 | 1.46710 | 1.88646 | 6  | 0.280773 | 49 | 0.280598 | 1.6  | 1.7 | 3.61 | 3444 | 25 | 1.4  | 3.62 |
| 14c | 0.0728 | 7  | 0.00173 | 2 | 1.46715 | 1.88666 | 10 | 0.280656 | 42 | 0.280540 | -0.2 | 1.5 | 3.72 | 3457 | 27 | -0.6 | 3.73 |
| 15c | 0.1112 | 28 | 0.00263 | 4 | 1.46720 | 1.88672 | 14 | 0.280730 | 43 | 0.280555 | 0.0  | 1.5 | 3.70 | 3442 | 25 | -0.1 | 3.70 |
| 16c | 0.1040 | 18 | 0.00253 | 4 | 1.46715 | 1.88670 | 14 | 0.280754 | 46 | 0.280587 | 0.7  | 1.6 | 3.64 | 3423 | 29 | 1.0  | 3.64 |
| 17c | 0.0573 | 13 | 0.00135 | 4 | 1.46715 | 1.88652 | 7  | 0.280687 | 44 | 0.280597 | 1.9  | 1.6 | 3.60 | 3458 | 24 | 1.4  | 3.62 |
| 18r | 0.0372 | 9  | 0.00094 | 2 | 1.46717 | 1.88656 | 8  | 0.280627 | 41 | 0.280565 | 0.4  | 1.5 | 3.67 | 3445 | 33 | 0.2  | 3.68 |
| 19c | 0.0517 | 14 | 0.00130 | 1 | 1.46709 | 1.88648 | 6  | 0.280649 | 44 | 0.280563 | -0.2 | 1.6 | 3.69 | 3422 | 34 | 0.1  | 3.69 |
| 20c | 0.1278 | 38 | 0.00298 | 9 | 1.46719 | 1.88662 | 11 | 0.280747 | 50 | 0.280550 | -0.5 | 1.8 | 3.71 | 3430 | 20 | -0.3 | 3.71 |

mean 3.67

2sd 0.10

**sample SW25**

|     |        |    |         |    |         |         |    |          |    |          |     |     |      |      |    |     |      |
|-----|--------|----|---------|----|---------|---------|----|----------|----|----------|-----|-----|------|------|----|-----|------|
| 1c  | 0.0450 | 10 | 0.00126 | 1  | 1.46717 | 1.88659 | 8  | 0.280784 | 42 | 0.280703 | 2.1 | 1.5 | 3.48 | 3309 | 23 | 2.4 | 3.47 |
| 1r  | 0.0147 | 3  | 0.00047 | 1  | 1.46713 | 1.88650 | 10 | 0.280721 | 42 | 0.280691 | 1.7 | 1.5 | 3.50 | 3309 | 19 | 2.0 | 3.49 |
| 2c  | 0.0250 | 16 | 0.00067 | 4  | 1.46715 | 1.88659 | 18 | 0.280749 | 41 | 0.280706 | 2.7 | 1.5 | 3.46 | 3327 | 24 | 2.6 | 3.46 |
| 3c  | 0.0365 | 15 | 0.00101 | 4  | 1.46715 | 1.88651 | 15 | 0.280780 | 41 | 0.280716 | 2.9 | 1.5 | 3.44 | 3324 | 24 | 2.9 | 3.44 |
| 4c  | 0.0177 | 16 | 0.00051 | 3  | 1.46717 | 1.88660 | 7  | 0.280743 | 44 | 0.280710 | 2.6 | 1.6 | 3.46 | 3318 | 22 | 2.7 | 3.45 |
| 5c  | 0.0186 | 24 | 0.00058 | 7  | 1.46715 | 1.88663 | 7  | 0.280711 | 44 | 0.280674 | 1.2 | 1.6 | 3.53 | 3314 | 16 | 1.4 | 3.53 |
| 6c  | 0.0179 | 7  | 0.00055 | 1  | 1.46710 | 1.88668 | 8  | 0.280754 | 44 | 0.280719 | 2.8 | 1.6 | 3.44 | 3313 | 14 | 3.0 | 3.44 |
| 7c  | 0.0364 | 14 | 0.00105 | 3  | 1.46708 | 1.88646 | 6  | 0.280766 | 42 | 0.280700 | 1.3 | 1.5 | 3.50 | 3278 | 19 | 2.3 | 3.48 |
| 7c  | 0.0433 | 27 | 0.00121 | 6  | 1.46714 | 1.88658 | 7  | 0.280770 | 51 | 0.280694 | 0.8 | 1.8 | 3.52 | 3268 | 21 | 2.1 | 3.49 |
| 8c  | 0.0387 | 3  | 0.00111 | 1  | 1.46714 | 1.88650 | 17 | 0.280773 | 40 | 0.280702 | 2.0 | 1.4 | 3.48 | 3306 | 24 | 2.4 | 3.47 |
| 9c  | 0.0491 | 14 | 0.00140 | 7  | 1.46709 | 1.88648 | 6  | 0.280764 | 48 | 0.280674 | 1.6 | 1.7 | 3.52 | 3330 | 18 | 1.4 | 3.53 |
| 9c  | 0.0373 | 13 | 0.00109 | 4  | 1.46716 | 1.88671 | 7  | 0.280757 | 46 | 0.280687 | 1.9 | 1.6 | 3.50 | 3323 | 27 | 1.9 | 3.50 |
| 10c | 0.0208 | 7  | 0.00063 | 1  | 1.46719 | 1.88666 | 7  | 0.280693 | 43 | 0.280652 | 0.6 | 1.5 | 3.57 | 3321 | 19 | 0.6 | 3.57 |
| 11c | 0.0710 | 9  | 0.00197 | 6  | 1.46717 | 1.88674 | 6  | 0.280832 | 44 | 0.280706 | 2.4 | 1.6 | 3.47 | 3317 | 17 | 2.5 | 3.46 |
| 11r | 0.0590 | 29 | 0.00164 | 6  | 1.46713 | 1.88652 | 7  | 0.280799 | 43 | 0.280694 | 2.3 | 1.5 | 3.48 | 3331 | 12 | 2.1 | 3.49 |
| 12c | 0.0174 | 3  | 0.00048 | 0  | 1.46715 | 1.88669 | 7  | 0.280714 | 42 | 0.280684 | 1.6 | 1.5 | 3.51 | 3317 | 23 | 1.8 | 3.51 |
| 13c | 0.0158 | 5  | 0.00047 | 1  | 1.46711 | 1.88661 | 7  | 0.280735 | 42 | 0.280705 | 2.5 | 1.5 | 3.47 | 3321 | 18 | 2.5 | 3.46 |
| 14c | 0.0579 | 11 | 0.00173 | 5  | 1.46713 | 1.88661 | 6  | 0.280824 | 45 | 0.280714 | 1.8 | 1.6 | 3.47 | 3279 | 14 | 2.8 | 3.45 |
| 15c | 0.0324 | 10 | 0.00093 | 2  | 1.46715 | 1.88664 | 7  | 0.280744 | 42 | 0.280685 | 1.7 | 1.5 | 3.51 | 3317 | 20 | 1.8 | 3.50 |
| 16c | 0.0318 | 36 | 0.00097 | 12 | 1.46712 | 1.88651 | 9  | 0.280747 | 42 | 0.280684 | 1.7 | 1.5 | 3.51 | 3321 | 22 | 1.8 | 3.51 |
| 17c | 0.0395 | 12 | 0.00113 | 2  | 1.46718 | 1.88663 | 7  | 0.280778 | 44 | 0.280705 | 2.7 | 1.6 | 3.46 | 3332 | 19 | 2.5 | 3.46 |

**3323 Ma**

|     |        |    |         |    |         |         |    |          |    |          |     |     |      |      |    |     |      |
|-----|--------|----|---------|----|---------|---------|----|----------|----|----------|-----|-----|------|------|----|-----|------|
| 18c | 0.0576 | 56 | 0.00165 | 16 | 1.46714 | 1.88657 | 8  | 0.280838 | 45 | 0.280732 | 3.4 | 1.6 | 3.41 | 3319 | 20 | 3.5 | 3.41 |
| 19c | 0.0397 | 5  | 0.00119 | 1  | 1.46708 | 1.88646 | 8  | 0.280768 | 47 | 0.280692 | 2.0 | 1.7 | 3.49 | 3320 | 15 | 2.0 | 3.49 |
| 20c | 0.0323 | 4  | 0.00092 | 1  | 1.46717 | 1.88663 | 17 | 0.280733 | 39 | 0.280674 | 1.3 | 1.4 | 3.53 | 3319 | 32 | 1.4 | 3.53 |
| 21c | 0.0198 | 12 | 0.00057 | 3  | 1.46710 | 1.88651 | 19 | 0.280730 | 39 | 0.280693 | 1.8 | 1.4 | 3.49 | 3310 | 22 | 2.1 | 3.49 |
| 22c | 0.0197 | 2  | 0.00056 | 0  | 1.46714 | 1.88648 | 19 | 0.280712 | 40 | 0.280677 | 1.5 | 1.4 | 3.52 | 3324 | 18 | 1.5 | 3.52 |
| 23c | 0.0228 | 2  | 0.00063 | 1  | 1.46715 | 1.88669 | 18 | 0.280749 | 40 | 0.280709 | 2.6 | 1.4 | 3.46 | 3322 | 19 | 2.6 | 3.46 |

mean 3.48

2sd 0.07

**sample MB31**

**3237 Ma**

|         |        |    |         |   |         |         |    |          |    |          |      |     |      |      |    |      |      |
|---------|--------|----|---------|---|---------|---------|----|----------|----|----------|------|-----|------|------|----|------|------|
| 1c      | 0.0192 | 24 | 0.00049 | 6 | 1.46724 | 1.88665 | 6  | 0.280687 | 46 | 0.280656 | -1.3 | 1.6 | 3.61 | 3235 | 47 | -1.3 | 3.61 |
| 2c      | 0.0153 | 3  | 0.00053 | 2 | 1.46711 | 1.88666 | 17 | 0.280683 | 43 | 0.280650 | -1.9 | 1.5 | 3.63 | 3217 | 29 | -1.5 | 3.62 |
| 3c      | 0.0143 | 19 | 0.00034 | 4 | 1.46718 | 1.88659 | 5  | 0.280698 | 44 | 0.280677 | -0.5 | 1.6 | 3.57 | 3238 | 17 | -0.5 | 3.57 |
| 5c      | 0.0207 | 17 | 0.00054 | 5 | 1.46712 | 1.88649 | 8  | 0.280691 | 48 | 0.280657 | -0.8 | 1.7 | 3.60 | 3255 | 19 | -1.2 | 3.60 |
| 7c      | 0.0134 | 11 | 0.00037 | 2 | 1.46723 | 1.88667 | 6  | 0.280718 | 43 | 0.280695 | -1.5 | 1.5 | 3.57 | 3167 | 21 | 0.1  | 3.53 |
| 8r      | 0.0163 | 9  | 0.00057 | 4 | 1.46718 | 1.88665 | 8  | 0.280702 | 51 | 0.280667 | -2.1 | 1.8 | 3.61 | 3187 | 27 | -0.9 | 3.59 |
| 9c      | 0.0096 | 12 | 0.00023 | 2 | 1.46724 | 1.88665 | 6  | 0.280686 | 47 | 0.280671 | -0.7 | 1.7 | 3.58 | 3239 | 18 | -0.7 | 3.58 |
| 10c     | 0.0124 | 8  | 0.00036 | 3 | 1.46719 | 1.88651 | 6  | 0.280701 | 47 | 0.280679 | -0.3 | 1.7 | 3.56 | 3245 | 13 | -0.5 | 3.56 |
| 12c     | 0.0234 | 6  | 0.00067 | 4 | 1.46715 | 1.88656 | 6  | 0.280774 | 50 | 0.280732 | 1.1  | 1.8 | 3.47 | 3221 | 24 | 1.4  | 3.46 |
| 13c     | 0.0215 | 11 | 0.00067 | 4 | 1.46719 | 1.88661 | 5  | 0.280734 | 42 | 0.280692 | -0.2 | 1.5 | 3.54 | 3228 | 25 | 0.0  | 3.54 |
| 14c     | 0.0396 | 13 | 0.00105 | 3 | 1.46713 | 1.88650 | 8  | 0.280793 | 46 | 0.280727 | 1.3  | 1.6 | 3.47 | 3239 | 31 | 1.3  | 3.47 |
| 15c     | 0.0186 | 4  | 0.00046 | 1 | 1.46719 | 1.88665 | 18 | 0.280707 | 40 | 0.280678 | 0.7  | 1.4 | 3.54 | 3286 | 26 | -0.5 | 3.56 |
| 16c-old | 0.0487 | 12 | 0.00118 | 4 | 1.46716 | 1.88649 | 20 | 0.280736 | 40 | 0.280660 | 1.9  | 1.4 | 3.53 | 3363 | 13 | -1.0 | 3.59 |
| 18c     | 0.0027 | 2  | 0.00007 | 0 | 1.46721 | 1.88663 | 17 | 0.280677 | 39 | 0.280673 | -0.7 | 1.4 | 3.58 | 3235 | 19 | -0.7 | 3.57 |
| 19c     | 0.0034 | 5  | 0.00009 | 1 | 1.46723 | 1.88677 | 5  | 0.280683 | 47 | 0.280677 | -0.6 | 1.7 | 3.57 | 3235 | 21 | -0.5 | 3.57 |
| 20c     | 0.0086 | 10 | 0.00025 | 3 | 1.46707 | 1.88652 | 16 | 0.280682 | 40 | 0.280667 | -1.0 | 1.4 | 3.59 | 3235 | 23 | -0.9 | 3.59 |
| 21c     | 0.0382 | 39 | 0.00111 | 6 | 1.46718 | 1.88674 | 14 | 0.280732 | 43 | 0.280663 | -1.3 | 1.5 | 3.60 | 3224 | 20 | -1.0 | 3.59 |
| 22c     | 0.0338 | 37 | 0.00093 | 9 | 1.46718 | 1.88669 | 6  | 0.280772 | 46 | 0.280714 | 0.9  | 1.7 | 3.49 | 3240 | 19 | 0.8  | 3.49 |
| 24c     | 0.0261 | 4  | 0.00065 | 1 | 1.46713 | 1.88659 | 18 | 0.280737 | 39 | 0.280697 | -0.7 | 1.4 | 3.55 | 3199 | 21 | 0.2  | 3.53 |
| 26c     | 0.0612 | 9  | 0.00137 | 2 | 1.46723 | 1.88662 | 15 | 0.280785 | 44 | 0.280700 | -0.1 | 1.6 | 3.53 | 3221 | 25 | 0.3  | 3.52 |

mean 3.56

2sd 0.09

**sample SW29**

**3217 Ma**

|    |        |    |         |   |         |         |    |          |    |          |      |     |      |      |    |      |      |
|----|--------|----|---------|---|---------|---------|----|----------|----|----------|------|-----|------|------|----|------|------|
| 5c | 0.0627 | 19 | 0.00151 | 3 | 1.46714 | 1.88655 | 14 | 0.280798 | 42 | 0.280704 | 0.1  | 1.5 | 3.52 | 3220 | 29 | 0.0  | 3.52 |
| 6c | 0.0187 | 3  | 0.00048 | 1 | 1.46714 | 1.88658 | 14 | 0.280726 | 43 | 0.280696 | -0.2 | 1.5 | 3.54 | 3221 | 36 | -0.3 | 3.54 |
| 6c | 0.0500 | 16 | 0.00117 | 3 | 1.46711 | 1.88652 | 15 | 0.280770 | 42 | 0.280698 | -0.2 | 1.5 | 3.53 | 3220 | 45 | -0.3 | 3.54 |
| 7c | 0.0403 | 10 | 0.00098 | 2 | 1.46708 | 1.88654 | 11 | 0.280776 | 40 | 0.280716 | 0.2  | 1.4 | 3.50 | 3210 | 18 | 0.4  | 3.50 |



|     |        |    |         |   |         |         |    |          |    |          |      |     |      |      |    |      |      |
|-----|--------|----|---------|---|---------|---------|----|----------|----|----------|------|-----|------|------|----|------|------|
| 8c  | 0.0552 | 33 | 0.00147 | 7 | 1.46717 | 1.88671 | 9  | 0.280746 | 44 | 0.280658 | -4.6 | 1.6 | 3.68 | 3094 | 27 | -1.8 | 3.62 |
| 9c  | 0.0415 | 16 | 0.00115 | 7 | 1.46722 | 1.88663 | 13 | 0.280757 | 41 | 0.280687 | -1.6 | 1.4 | 3.58 | 3177 | 37 | -0.7 | 3.56 |
| 9r  | 0.0609 | 21 | 0.00153 | 9 | 1.46711 | 1.88652 | 14 | 0.280801 | 41 | 0.280706 | -0.2 | 1.4 | 3.52 | 3207 | 40 | 0.0  | 3.52 |
| 10c | 0.0587 | 39 | 0.00123 | 8 | 1.46716 | 1.88651 | 4  | 0.280771 | 46 | 0.280695 | -0.8 | 1.6 | 3.55 | 3197 | 39 | -0.4 | 3.54 |
| 13c | 0.0779 | 11 | 0.00183 | 3 | 1.46710 | 1.88650 | 12 | 0.280804 | 43 | 0.280690 | 0.0  | 1.5 | 3.54 | 3241 | 23 | -0.5 | 3.55 |
| 19c | 0.0306 | 16 | 0.00073 | 2 | 1.46720 | 1.88661 | 6  | 0.280753 | 49 | 0.280708 | 0.4  | 1.7 | 3.51 | 3232 | 29 | 0.1  | 3.52 |
| 20c | 0.0526 | 19 | 0.00133 | 6 | 1.46713 | 1.88661 | 6  | 0.280780 | 44 | 0.280699 | -0.7 | 1.6 | 3.54 | 3199 | 21 | -0.2 | 3.53 |
| 21c | 0.0606 | 17 | 0.00149 | 3 | 1.46705 | 1.88654 | 5  | 0.280743 | 49 | 0.280651 | -1.8 | 1.7 | 3.63 | 3221 | 17 | -1.9 | 3.63 |
| 21r | 0.0637 | 24 | 0.00150 | 4 | 1.46715 | 1.88658 | 6  | 0.280752 | 49 | 0.280661 | -3.5 | 1.7 | 3.65 | 3133 | 32 | -1.6 | 3.61 |
| 22c | 0.0430 | 11 | 0.00107 | 1 | 1.46709 | 1.88661 | 6  | 0.280763 | 49 | 0.280696 | -0.4 | 1.7 | 3.54 | 3212 | 28 | -0.3 | 3.54 |
| 23r | 0.0709 | 13 | 0.00173 | 4 | 1.46722 | 1.88663 | 6  | 0.280812 | 50 | 0.280705 | -0.2 | 1.8 | 3.52 | 3210 | 36 | 0.0  | 3.52 |
| 24c | 0.0597 | 36 | 0.00142 | 7 | 1.46718 | 1.88669 | 10 | 0.280761 | 46 | 0.280673 | -1.3 | 1.6 | 3.59 | 3212 | 22 | -1.1 | 3.58 |

mean 3.55

2sd 0.08

**sample SIN23**

|     |        |    |         |    |         |         |    |          |    |          |       |     |      |      |     |      |      |
|-----|--------|----|---------|----|---------|---------|----|----------|----|----------|-------|-----|------|------|-----|------|------|
| 3c  | 0.0544 | 9  | 0.00133 | 5  | 1.46709 | 1.88648 | 21 | 0.280805 | 39 | 0.280759 | -30.3 | 1.4 | 4.09 | 1838 | 44  | -2.8 | 3.56 |
| 4c  | 0.0609 | 11 | 0.00145 | 2  | 1.46718 | 1.88660 | 9  | 0.280834 | 41 | 0.280759 | -10.4 | 1.5 | 3.69 | 2694 | 24  | -2.0 | 3.52 |
| 5c  | 0.1384 | 33 | 0.00319 | 13 | 1.46715 | 1.88670 | 12 | 0.280878 | 45 | 0.280714 | -12.2 | 1.6 | 3.78 | 2688 | 27  | -4.1 | 3.63 |
| 6r  | 0.0596 | 14 | 0.00139 | 2  | 1.46715 | 1.88650 | 8  | 0.280794 | 45 | 0.280718 | -8.7  | 1.6 | 3.70 | 2829 | 33  | -3.3 | 3.59 |
| 6r  | 0.0787 | 21 | 0.00231 | 9  | 1.46709 | 1.88671 | 8  | 0.280808 | 47 | 0.280673 | -5.3  | 1.7 | 3.68 | 3041 | 28  | -4.7 | 3.66 |
| 9c  | 0.0596 | 16 | 0.00133 | 2  | 1.46712 | 1.88651 | 19 | 0.280808 | 41 | 0.280740 | -11.8 | 1.5 | 3.74 | 2662 | 31  | -2.7 | 3.55 |
| 9c  | 0.0429 | 15 | 0.00113 | 8  | 1.46711 | 1.88658 | 11 | 0.280772 | 43 | 0.280711 | -9.6  | 1.5 | 3.73 | 2800 | 25  | -3.5 | 3.60 |
| 10c | 0.0436 | 10 | 0.00102 | 2  | 1.46716 | 1.88661 | 8  | 0.280829 | 44 | 0.280769 | -1.0  | 1.6 | 3.47 | 3078 | 39  | -1.3 | 3.47 |
| 10c | 0.0385 | 6  | 0.00083 | 1  | 1.46719 | 1.88655 | 19 | 0.280812 | 40 | 0.280763 | -1.6  | 1.4 | 3.49 | 3061 | 21  | -1.5 | 3.49 |
| 11c | 0.1087 | 34 | 0.00263 | 15 | 1.46712 | 1.88671 | 10 | 0.280883 | 42 | 0.280788 | -28.0 | 1.5 | 4.01 | 1892 | 62  | -2.7 | 3.56 |
| 11c | 0.0787 | 27 | 0.00180 | 7  | 1.46712 | 1.88655 | 10 | 0.280843 | 47 | 0.280767 | -21.6 | 1.7 | 3.91 | 2201 | 76  | -2.4 | 3.54 |
| 12c | 0.0864 | 34 | 0.00233 | 16 | 1.46722 | 1.88656 | 11 | 0.280855 | 45 | 0.280720 | -4.5  | 1.6 | 3.60 | 3003 | 28  | -3.1 | 3.58 |
| 10r | 0.0950 | 12 | 0.00232 | 3  | 1.46711 | 1.88653 | 17 | 0.280853 | 44 | 0.280792 | -39.7 | 1.6 | 4.22 | 1376 | 73  | -3.2 | 3.58 |
| 10r | 0.0946 | 6  | 0.00254 | 6  | 1.46715 | 1.88663 | 17 | 0.280909 | 45 | 0.280803 | -20.6 | 1.6 | 3.84 | 2191 | 147 | -1.6 | 3.49 |

mean 3.56

2sd 0.11

**sample MB32**

|    |        |    |         |   |         |         |    |          |    |          |      |     |      |      |    |      |      |
|----|--------|----|---------|---|---------|---------|----|----------|----|----------|------|-----|------|------|----|------|------|
| 1c | 0.0229 | 7  | 0.00062 | 1 | 1.46709 | 1.88668 | 10 | 0.280885 | 41 | 0.280853 | -7.8 | 1.5 | 3.52 | 2665 | 16 | -6.4 | 3.49 |
| 2c | 0.0323 | 37 | 0.00072 | 6 | 1.46709 | 1.88647 | 8  | 0.280822 | 43 | 0.280785 | -8.8 | 1.5 | 3.62 | 2725 | 31 | -8.8 | 3.62 |
| 1c | 0.0251 | 4  | 0.00068 | 0 | 1.46715 | 1.88652 | 9  | 0.280863 | 43 | 0.280829 | -8.8 | 1.5 | 3.57 | 2659 | 16 | -7.3 | 3.54 |
| 3c | 0.0253 | 6  | 0.00066 | 1 | 1.46715 | 1.88657 | 8  | 0.280874 | 46 | 0.280840 | -7.8 | 1.6 | 3.53 | 2681 | 22 | -6.9 | 3.51 |

**2722 Ma**

|        |        |     |         |    |         |         |    |          |    |          |       |     |      |      |    |      |      |
|--------|--------|-----|---------|----|---------|---------|----|----------|----|----------|-------|-----|------|------|----|------|------|
| 6c     | 0.0192 | 3   | 0.00049 | 0  | 1.46710 | 1.88652 | 7  | 0.280881 | 42 | 0.280855 | -5.5  | 1.5 | 3.47 | 2756 | 17 | -6.3 | 3.48 |
| 7r     | 0.0458 | 24  | 0.00108 | 5  | 1.46714 | 1.88647 | 11 | 0.280868 | 48 | 0.280824 | -20.9 | 1.7 | 3.82 | 2142 | 58 | -7.9 | 3.57 |
| 8c     | 0.0338 | 18  | 0.00085 | 3  | 1.46717 | 1.88656 | 7  | 0.280904 | 44 | 0.280860 | -6.3  | 1.6 | 3.48 | 2715 | 25 | -6.2 | 3.47 |
| 9c     | 0.0225 | 7   | 0.00059 | 1  | 1.46717 | 1.88654 | 9  | 0.280885 | 43 | 0.280854 | -6.5  | 1.5 | 3.49 | 2717 | 21 | -6.4 | 3.49 |
| 10c    | 0.0344 | 36  | 0.00081 | 8  | 1.46715 | 1.88649 | 8  | 0.280897 | 44 | 0.280854 | -5.9  | 1.6 | 3.48 | 2741 | 18 | -6.4 | 3.49 |
| 11c    | 0.0277 | 6   | 0.00069 | 1  | 1.46712 | 1.88652 | 8  | 0.280863 | 43 | 0.280828 | -8.1  | 1.5 | 3.55 | 2689 | 15 | -7.3 | 3.54 |
| 11c    | 0.0146 | 5   | 0.00037 | 1  | 1.46712 | 1.88676 | 7  | 0.280871 | 45 | 0.280852 | -6.4  | 1.6 | 3.49 | 2727 | 21 | -6.5 | 3.49 |
| 12c    | 0.0215 | 5   | 0.00056 | 1  | 1.46718 | 1.88653 | 8  | 0.280880 | 44 | 0.280850 | -6.7  | 1.6 | 3.50 | 2713 | 27 | -6.5 | 3.49 |
| 13c    | 0.0172 | 3   | 0.00045 | 0  | 1.46710 | 1.88655 | 8  | 0.280867 | 40 | 0.280843 | -6.5  | 1.4 | 3.50 | 2734 | 16 | -6.8 | 3.51 |
| 14c    | 0.0232 | 7   | 0.00058 | 1  | 1.46714 | 1.88655 | 7  | 0.280869 | 44 | 0.280839 | -6.7  | 1.5 | 3.51 | 2731 | 18 | -6.9 | 3.52 |
| 14c    | 0.0193 | 5   | 0.00048 | 0  | 1.46711 | 1.88655 | 7  | 0.280883 | 43 | 0.280858 | -6.2  | 1.5 | 3.48 | 2722 | 29 | -6.3 | 3.48 |
| 15c    | 0.0230 | 4   | 0.00061 | 2  | 1.46707 | 1.88664 | 8  | 0.280865 | 40 | 0.280833 | -6.3  | 1.4 | 3.51 | 2758 | 17 | -7.1 | 3.53 |
| 15c/r? | 0.0258 | 5   | 0.00070 | 2  | 1.46719 | 1.88668 | 9  | 0.280910 | 41 | 0.280874 | -5.5  | 1.5 | 3.44 | 2728 | 16 | -5.7 | 3.45 |
| 16c    | 0.0539 | 145 | 0.00127 | 29 | 1.46718 | 1.88659 | 9  | 0.280838 | 42 | 0.280771 | -9.2  | 1.5 | 3.64 | 2729 | 17 | -9.3 | 3.65 |
| 16r    | 0.0454 | 29  | 0.00113 | 8  | 1.46706 | 1.88663 | 10 | 0.280899 | 44 | 0.280842 | -8.7  | 1.6 | 3.55 | 2643 | 15 | -6.9 | 3.51 |
| 17c    | 0.0437 | 7   | 0.00117 | 2  | 1.46708 | 1.88657 | 8  | 0.280915 | 43 | 0.280854 | -5.9  | 1.5 | 3.48 | 2741 | 20 | -6.4 | 3.49 |
| 18c    | 0.0179 | 14  | 0.00051 | 3  | 1.46715 | 1.88647 | 9  | 0.280910 | 39 | 0.280884 | -4.9  | 1.4 | 3.42 | 2740 | 28 | -5.3 | 3.43 |
| 19c    | 0.0331 | 15  | 0.00086 | 5  | 1.46711 | 1.88656 | 9  | 0.280884 | 41 | 0.280839 | -7.1  | 1.5 | 3.52 | 2715 | 15 | -6.9 | 3.52 |
| 20r    | 0.0171 | 5   | 0.00047 | 1  | 1.46711 | 1.88668 | 9  | 0.280885 | 40 | 0.280861 | -7.0  | 1.4 | 3.49 | 2685 | 19 | -6.1 | 3.47 |
| 21c    | 0.0544 | 30  | 0.00135 | 4  | 1.46712 | 1.88646 | 9  | 0.280950 | 46 | 0.280880 | -5.9  | 1.6 | 3.44 | 2704 | 17 | -5.5 | 3.44 |
| 22c    | 0.0136 | 3   | 0.00039 | 1  | 1.46710 | 1.88654 | 9  | 0.280876 | 40 | 0.280856 | -6.6  | 1.4 | 3.49 | 2709 | 19 | -6.3 | 3.48 |
| 22c    | 0.0373 | 6   | 0.00100 | 2  | 1.46711 | 1.88665 | 7  | 0.280932 | 44 | 0.280880 | -5.9  | 1.6 | 3.44 | 2704 | 25 | -5.5 | 3.44 |
| 22c    | 0.0170 | 3   | 0.00047 | 0  | 1.46707 | 1.88647 | 9  | 0.280876 | 41 | 0.280852 | -6.4  | 1.5 | 3.49 | 2725 | 19 | -6.4 | 3.49 |
| 23c    | 0.0342 | 54  | 0.00085 | 13 | 1.46716 | 1.88662 | 8  | 0.280911 | 44 | 0.280867 | -5.7  | 1.6 | 3.46 | 2730 | 22 | -5.9 | 3.46 |
| 24c    | 0.0198 | 6   | 0.00051 | 1  | 1.46719 | 1.88658 | 7  | 0.280868 | 45 | 0.280841 | -6.7  | 1.6 | 3.51 | 2730 | 29 | -6.8 | 3.51 |
| 25c    | 0.0250 | 11  | 0.00070 | 2  | 1.46712 | 1.88671 | 7  | 0.280872 | 45 | 0.280836 | -7.2  | 1.6 | 3.53 | 2713 | 21 | -7.0 | 3.52 |
| 25r    | 0.0223 | 6   | 0.00062 | 2  | 1.46709 | 1.88655 | 9  | 0.280861 | 42 | 0.280829 | -7.8  | 1.5 | 3.55 | 2697 | 19 | -7.3 | 3.54 |
| 26c    | 0.0209 | 2   | 0.00056 | 2  | 1.46711 | 1.88662 | 8  | 0.280893 | 42 | 0.280864 | -6.4  | 1.5 | 3.48 | 2708 | 18 | -6.0 | 3.47 |
| 27c    | 0.0215 | 3   | 0.00057 | 1  | 1.46719 | 1.88653 | 8  | 0.280902 | 45 | 0.280872 | -5.5  | 1.6 | 3.45 | 2730 | 39 | -5.7 | 3.45 |
| 27c    | 0.0440 | 14  | 0.00112 | 3  | 1.46707 | 1.88668 | 8  | 0.280929 | 41 | 0.280870 | -5.5  | 1.4 | 3.45 | 2736 | 20 | -5.8 | 3.45 |

mean 3.50  
2sd 0.09

**sample SIC19**

|    |        |    |         |   |         |         |   |          |    |          |       |     |      |      |    |      |      |
|----|--------|----|---------|---|---------|---------|---|----------|----|----------|-------|-----|------|------|----|------|------|
| 2c | 0.0574 | 24 | 0.00136 | 6 | 1.46708 | 1.88654 | 9 | 0.280932 | 43 | 0.280881 | -22.5 | 1.5 | 3.79 | 1989 | 88 | -6.1 | 3.47 |
| 3c | 0.0485 | 12 | 0.00114 | 4 | 1.46707 | 1.88671 | 9 | 0.280913 | 44 | 0.280853 | -6.1  | 1.6 | 3.48 | 2736 | 45 | -6.4 | 3.49 |
| 3r | 0.0431 | 32 | 0.00103 | 7 | 1.46709 | 1.88670 | 9 | 0.280893 | 43 | 0.280839 | -6.9  | 1.5 | 3.52 | 2722 | 40 | -6.9 | 3.52 |

**2722 Ma**

|     |        |    |         |    |         |         |    |          |    |          |       |     |      |      |     |      |      |
|-----|--------|----|---------|----|---------|---------|----|----------|----|----------|-------|-----|------|------|-----|------|------|
| 3r  | 0.0272 | 3  | 0.00068 | 1  | 1.46710 | 1.88651 | 9  | 0.280890 | 41 | 0.280855 | -6.5  | 1.4 | 3.49 | 2715 | 39  | -6.4 | 3.49 |
| 4c  | 0.0513 | 31 | 0.00122 | 8  | 1.46711 | 1.88657 | 9  | 0.280885 | 43 | 0.280821 | -7.6  | 1.5 | 3.55 | 2720 | 25  | -7.6 | 3.55 |
| 5c  | 0.0383 | 4  | 0.00089 | 1  | 1.46717 | 1.88657 | 7  | 0.280880 | 45 | 0.280834 | -6.9  | 1.6 | 3.52 | 2731 | 47  | -7.1 | 3.53 |
| 6c  | 0.0404 | 21 | 0.00095 | 4  | 1.46713 | 1.88660 | 9  | 0.280883 | 43 | 0.280833 | -6.7  | 1.5 | 3.52 | 2740 | 33  | -7.1 | 3.53 |
| 7c  | 0.0369 | 12 | 0.00086 | 2  | 1.46720 | 1.88656 | 10 | 0.280883 | 43 | 0.280838 | -6.9  | 1.5 | 3.52 | 2723 | 48  | -6.9 | 3.52 |
| 8c  | 0.0709 | 51 | 0.00171 | 12 | 1.46706 | 1.88666 | 9  | 0.280903 | 41 | 0.280823 | -14.3 | 1.5 | 3.69 | 2430 | 29  | -7.8 | 3.57 |
| 9c  | 0.0447 | 23 | 0.00100 | 4  | 1.46707 | 1.88664 | 8  | 0.280851 | 42 | 0.280799 | -8.3  | 1.5 | 3.59 | 2722 | 10  | -8.3 | 3.59 |
| 9c  | 0.0433 | 22 | 0.00097 | 4  | 1.46708 | 1.88670 | 8  | 0.280875 | 42 | 0.280843 | -30.1 | 1.5 | 3.98 | 1715 | 105 | -7.4 | 3.54 |
| 10c | 0.0376 | 15 | 0.00087 | 2  | 1.46718 | 1.88653 | 9  | 0.280878 | 41 | 0.280846 | -24.9 | 1.5 | 3.88 | 1937 | 68  | -7.1 | 3.53 |
| 11c | 0.0483 | 16 | 0.00112 | 3  | 1.46710 | 1.88660 | 9  | 0.280889 | 40 | 0.280841 | -18.0 | 1.4 | 3.74 | 2244 | 53  | -7.2 | 3.53 |
| 12c | 0.0459 | 19 | 0.00106 | 3  | 1.46714 | 1.88670 | 9  | 0.280884 | 43 | 0.280829 | -7.7  | 1.5 | 3.54 | 2706 | 23  | -7.3 | 3.54 |
| 13c | 0.0489 | 24 | 0.00112 | 4  | 1.46709 | 1.88674 | 9  | 0.280892 | 43 | 0.280833 | -6.9  | 1.5 | 3.52 | 2732 | 37  | -7.1 | 3.53 |
| 14c | 0.0409 | 25 | 0.00092 | 5  | 1.46713 | 1.88668 | 9  | 0.280874 | 42 | 0.280826 | -7.5  | 1.5 | 3.54 | 2719 | 29  | -7.4 | 3.54 |
| 12c | 0.0695 | 37 | 0.00161 | 8  | 1.46711 | 1.88665 | 9  | 0.280931 | 46 | 0.280847 | -6.6  | 1.6 | 3.50 | 2722 | 10  | -6.6 | 3.50 |
| 15c | 0.0795 | 68 | 0.00188 | 18 | 1.46709 | 1.88663 | 9  | 0.280908 | 50 | 0.280810 | -7.9  | 1.8 | 3.57 | 2722 | 10  | -7.9 | 3.57 |
| 16c | 0.0310 | 7  | 0.00073 | 1  | 1.46709 | 1.88660 | 7  | 0.280854 | 45 | 0.280816 | -7.6  | 1.6 | 3.56 | 2729 | 83  | -7.7 | 3.56 |
| 17c | 0.0622 | 19 | 0.00142 | 5  | 1.46714 | 1.88665 | 8  | 0.280908 | 46 | 0.280834 | -7.1  | 1.6 | 3.52 | 2722 | 40  | -7.1 | 3.52 |
| 18c | 0.0650 | 9  | 0.00154 | 4  | 1.46726 | 1.88678 | 8  | 0.280914 | 46 | 0.280834 | -7.2  | 1.6 | 3.53 | 2717 | 29  | -7.1 | 3.53 |
| 19c | 0.0436 | 12 | 0.00107 | 4  | 1.46709 | 1.88661 | 8  | 0.280878 | 45 | 0.280821 | -7.0  | 1.6 | 3.54 | 2745 | 52  | -7.5 | 3.55 |
| 20c | 0.0313 | 12 | 0.00080 | 3  | 1.46712 | 1.88661 | 7  | 0.280861 | 45 | 0.280819 | -7.5  | 1.6 | 3.55 | 2725 | 42  | -7.6 | 3.55 |

---

mean 3.53  
2sd 0.06

**sample NG22**

|     |        |    |         |   |         |         |    |          |    |          |       |     |      |      |    |      |      |
|-----|--------|----|---------|---|---------|---------|----|----------|----|----------|-------|-----|------|------|----|------|------|
| 5c  | 0.0495 | 23 | 0.00112 | 5 | 1.46713 | 1.88665 | 5  | 0.280913 | 50 | 0.280868 | -20.2 | 1.8 | 3.76 | 2107 | 26 | -6.3 | 3.48 |
| 7c  | 0.0533 | 16 | 0.00121 | 5 | 1.46708 | 1.88668 | 5  | 0.280925 | 48 | 0.280862 | -6.2  | 1.7 | 3.47 | 2719 | 44 | -6.0 | 3.47 |
| 8c  | 0.0301 | 7  | 0.00067 | 1 | 1.46719 | 1.88665 | 5  | 0.280842 | 50 | 0.280807 | -8.1  | 1.8 | 3.58 | 2722 | 70 | -7.9 | 3.58 |
| 10c | 0.0457 | 17 | 0.00099 | 3 | 1.46716 | 1.88660 | 11 | 0.280858 | 44 | 0.280806 | -7.7  | 1.6 | 3.57 | 2737 | 30 | -7.9 | 3.58 |
| 11c | 0.0475 | 36 | 0.00110 | 8 | 1.46719 | 1.88652 | 6  | 0.280936 | 49 | 0.280878 | -5.4  | 1.7 | 3.44 | 2727 | 42 | -5.4 | 3.44 |
| 12c | 0.0321 | 9  | 0.00076 | 1 | 1.46709 | 1.88669 | 5  | 0.280854 | 45 | 0.280815 | -8.5  | 1.6 | 3.58 | 2690 | 32 | -7.7 | 3.56 |
| 12c | 0.0430 | 8  | 0.00098 | 2 | 1.46706 | 1.88654 | 5  | 0.280858 | 52 | 0.280807 | -8.3  | 1.8 | 3.58 | 2710 | 51 | -8.0 | 3.58 |
| 14c | 0.0503 | 22 | 0.00136 | 6 | 1.46710 | 1.88657 | 6  | 0.280876 | 50 | 0.280805 | -7.9  | 1.8 | 3.58 | 2731 | 31 | -8.0 | 3.58 |
| 14c | 0.0368 | 14 | 0.00094 | 7 | 1.46724 | 1.88670 | 6  | 0.280904 | 45 | 0.280855 | -6.4  | 1.6 | 3.49 | 2720 | 38 | -6.2 | 3.48 |
| 20c | 0.0369 | 10 | 0.00090 | 4 | 1.46725 | 1.88670 | 6  | 0.280907 | 50 | 0.280860 | -6.1  | 1.8 | 3.47 | 2725 | 21 | -6.0 | 3.47 |
| 23c | 0.0512 | 32 | 0.00111 | 7 | 1.46718 | 1.88668 | 12 | 0.280912 | 46 | 0.280855 | -7.8  | 1.6 | 3.52 | 2657 | 47 | -6.3 | 3.48 |
| 24c | 0.0349 | 8  | 0.00079 | 1 | 1.46724 | 1.88664 | 5  | 0.280870 | 51 | 0.280829 | -7.1  | 1.8 | 3.53 | 2730 | 40 | -7.2 | 3.53 |
| 24c | 0.0241 | 5  | 0.00056 | 1 | 1.46726 | 1.88665 | 11 | 0.280881 | 41 | 0.280852 | -7.3  | 1.5 | 3.51 | 2685 | 43 | -6.4 | 3.49 |

**2727 Ma**



(a)  $^{176}\text{Yb}/^{177}\text{Hf} = (^{176}\text{Yb}/^{173}\text{Yb})_{\text{true}} \times (^{173}\text{Yb}/^{177}\text{Hf})_{\text{meas}} \times (M_{173(\text{Yb})}/M_{177(\text{Hf})})^{\beta(\text{Hf})}$ ,  $\beta(\text{Hf}) = \ln(^{179}\text{Hf}/^{177}\text{Hf}_{\text{true}} / ^{179}\text{Hf}/^{177}\text{Hf}_{\text{measured}}) / \ln(M_{179(\text{Hf})}/M_{177(\text{Hf})})$ , M=mass of respective isotope. The  $^{176}\text{Lu}/^{177}\text{Hf}$  were calculated in a similar way by using the  $^{175}\text{Lu}/^{177}\text{Hf}$  and  $\beta(\text{Yb})$ .

Quoted uncertainties (absolute) relate to the last quoted figure. The effect of the inter-element fractionation on the Lu/Hf was estimated to be about 6 % or less based on analyses of the GJ-1 and Plesoviče zircons.

(b) Mean Hf signal in volt.

(c) Uncertainties are quadratic additions of the within-run precision and the daily reproducibility of the 40ppb-JMC475 solution. Uncertainties for the JMC475 is 2SD (2 standard deviation).

(d) Initial  $^{176}\text{Hf}/^{177}\text{Hf}$  and  $\varepsilon\text{Hf}$  calculated using the apparent Pb-Pb age determined by LA-ICP-MS dating (see column f), and the CHUR parameters:

$^{176}\text{Lu}/^{177}\text{Hf} = 0.0336$ , and  $^{176}\text{Hf}/^{177}\text{Hf} = 0.282785$  (Bouvier et al., 2008).

(e) two stage model age in billion years using the measured  $^{176}\text{Lu}/^{177}\text{Lu}$  and Pb-Pb age of each spot (first stage = age of zircon), a value of 0.0113 for the average continental crust (second stage), and a depleted mantle  $^{176}\text{Lu}/^{177}\text{Hf}$  and  $^{176}\text{Hf}/^{177}\text{Hf}$  of 0.03933 and 0.283294 (see Blichert-Toft & Puchtel, 2010).

(f) apparent Pb-Pb age determined by LA-SF-ICP-MS, \*-intrusion age = cursive number in column  $\varepsilon\text{Hf}(\text{int})^g$

(g)  $\varepsilon\text{Hf}$  and  $T_{\text{DM}}$  calculated for time of intrusion (intrusion age - cursive number on top of column)

(h) like (g) but using  $^{176}\text{Lu}/^{177}\text{Lu}$  of 0.020 for average Archean-Hadean mafic crust (average and 2sd values are calculated without using the bold-cursive numbers)

(i) like (h) but using the CHUR parameters of Bouvier et al. (2008) (values calculated without using the bold-cursive numbers)

c = core, r = rim (in first column)























































| $T_{DM2}^h$<br>(Ga) | $T_{CHUR}^i$<br>(Ga) |
|---------------------|----------------------|
| 4.14                | 3.84                 |
| 3.96                | 3.65                 |
| 4.11                | 3.81                 |
| 4.02                | 3.72                 |
| 3.99                | 3.69                 |
| 4.17                | 3.87                 |
| 4.25                | 3.95                 |
| 3.92                | 3.61                 |
| 4.02                | 3.72                 |
| 4.11                | 3.80                 |
| 4.08                | 3.77                 |
| 4.14                | 3.84                 |
| 4.08                | 3.78                 |
| 4.16                | 3.86                 |
| 4.05                | 3.74                 |
| 4.16                | 3.86                 |
| 4.11                | 3.81                 |
| 3.93                | 3.62                 |
| 3.92                | 3.61                 |
| <b>4.15</b>         | <b>3.70</b>          |
| 4.07                | 3.77                 |
| 4.09                | 3.79                 |
| <b>4.24</b>         | <b>3.79</b>          |
| 4.17                | 3.86                 |
| 4.13                | 3.82                 |
| <b>3.67</b>         | <b>3.21</b>          |
| 4.03                | 3.72                 |
| 4.08                | 3.77                 |

0.18 0.18

**3.54 3.06**

**3.57 3.09**

**3.65 3.17**

**3.58 3.10**

4.17 3.87

3.86 3.56

3.99 3.69

**3.71 3.27**

**3.68 3.20**

**3.55 3.07**

**3.68 3.24**

4.23 3.93

4.15 3.85

4.13 3.83

4.01 3.71

**3.67 3.20**

**3.72 3.27**

4.21 3.91

4.12 3.82

4.10 3.80

4.17 3.87

4.03 3.73

4.03 3.73

4.05 3.75

4.14 3.84

3.93 3.63

4.08 3.78

**3.55 3.07**

**3.55 3.07**

**3.69 3.24**

4.12 3.82

**3.66 3.19**

|             |             |
|-------------|-------------|
| 3.98        | 3.68        |
| <b>3.67</b> | <b>3.19</b> |
| <b>3.60</b> | <b>3.12</b> |
| 3.87        | 3.57        |
| <hr/>       |             |
| 4.07        | 3.77        |
| 0.21        | 0.21        |

3.66  
**3.76**  
3.59  
3.76  
3.73  
3.80  
3.72  
3.72  
3.76  
3.60  
**3.60**  
3.61  
**3.56**  
3.54  
3.78  

---

3.70  
3.69  
0.17

**4.10**  
3.66  
3.72  
**3.70**  
3.86  
3.54  
3.63  
**3.97**



3.73  
3.67  
3.60  
3.60  
3.69  
3.82  
3.76  
**3.89**  
**3.95**  
3.64  
3.69  
0.19

3.81  
3.76  
3.69  
3.76  
3.75  
0.10

3.64  
3.72  
3.71  
3.77  
3.76  
3.71  
3.71  
**4.30**  
3.80  
**3.92**  
3.78  
**3.83**  
**3.96**  
**3.88**  
**3.73**

3.78  
3.75  
3.65  
3.73  
3.73  
3.72  
3.74  
3.76  
3.70  
3.73  
3.73  
0.08

3.77  
3.73  
3.75  
3.74  
3.79  
3.65  
3.78  
3.71  
3.70  
3.73  
3.75  
3.72  
3.70  
3.78  
3.76  
3.64  
3.74  
3.80  
3.75  
3.72  
3.77  
3.71  
3.73

3.75  
3.73  
3.75  
3.76  
3.74  
0.08

3.71  
3.70  
3.61  
3.75  
3.68  
3.65  
3.68  
3.60  
3.82  
3.68  
3.62  
3.76  
3.68  
3.73  
3.82  
3.81  
3.65  
3.71  
3.68  
3.67  
3.71  
3.68  
3.81  
3.77  
3.78  
3.69  
3.71  
0.13

3.85  
3.68  
3.85  
3.69  
3.71  
3.87  
3.83  
3.74  
3.71  
3.80  
3.81  
3.85  
3.78  
0.15

3.54  
3.57  
3.53  
3.50  
3.52  
3.62  
3.49  
3.55  
3.57  
3.54  
3.62  
3.58  
3.68  
3.53  
3.56  
3.59  
3.53  
3.51  
3.59  
3.59  
3.53

3.45

3.57

3.62

3.57

3.61

3.52

---

3.56

0.10

3.78

3.80

3.72

3.78

3.67

3.75

3.74

3.71

3.56

3.68

3.57

3.72

3.76

3.73

3.72

3.75

3.76

3.61

3.66

3.65

---

3.71

0.13

3.67

3.69

3.69

3.63

3.81  
3.72  
3.66  
3.70  
3.71  
3.66  
3.68  
3.82  
3.80  
3.69  
3.66  
3.76  
3.71  
0.11

3.79  
3.73  
3.89  
3.83  
3.95  
3.78  
3.85  
3.67  
3.68  
3.78  
3.76  
3.81  
3.82  
3.70  
3.79  
0.16

3.85  
4.04  
3.92  
3.89

3.84  
3.96  
3.83  
3.84  
3.84  
3.92  
3.85  
3.85  
3.88  
3.89  
3.83  
3.90  
3.79  
4.08  
3.88  
3.84  
3.76  
3.89  
3.82  
3.77  
3.84  
3.77  
3.85  
3.81  
3.88  
3.90  
3.92  
3.82  
3.79  
3.80  
3.86  
0.14  
  
3.82  
3.85  
3.89

3.84  
3.94  
3.90  
3.90  
3.89  
3.96  
4.00  
3.93  
3.90  
3.91  
3.92  
3.90  
3.93  
3.86  
3.97  
3.95  
3.90  
3.90  
3.94  

---

3.94  
0.08

3.84  
3.82  
3.97  
3.97  
3.77  
3.95  
3.97  
3.98  
3.84  
3.82  
3.84  
3.91  
3.85



3.93  
3.85  
3.89  
0.14

\_\_\_\_\_

\_\_\_\_\_

\_\_\_\_\_

\_\_\_\_\_













































































—

—

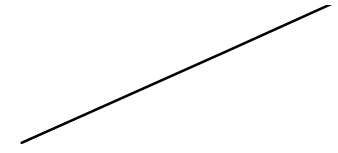













































































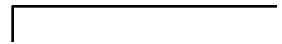



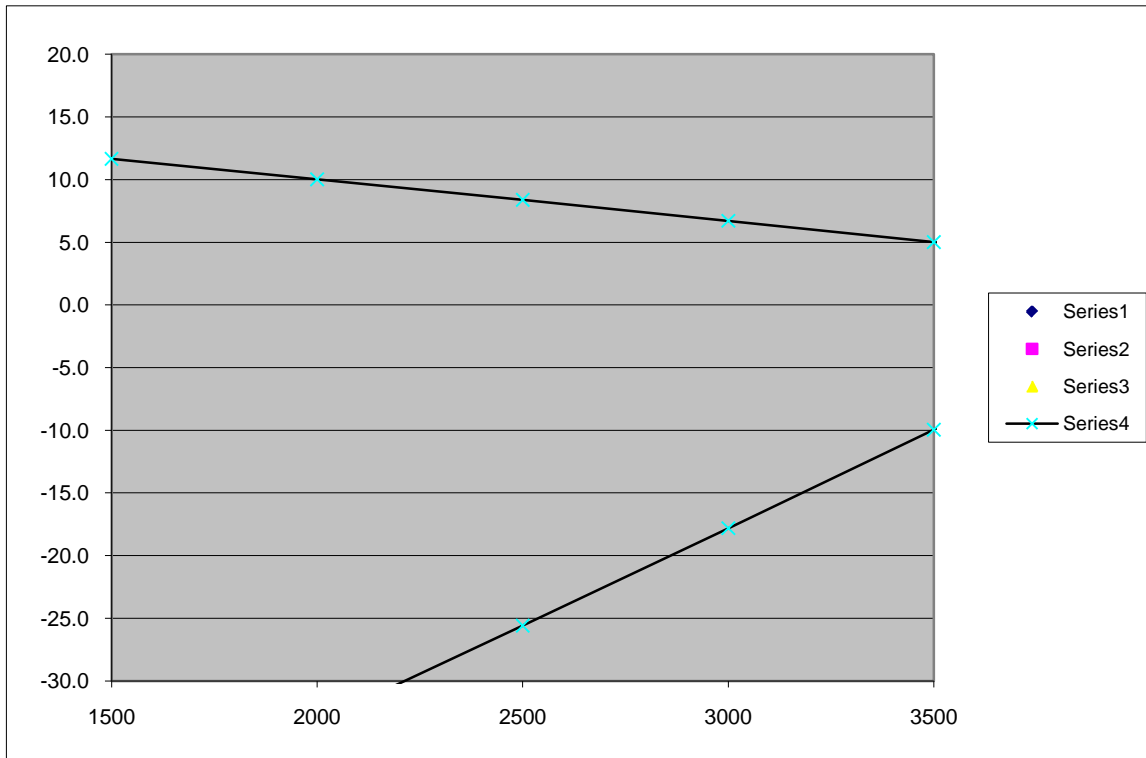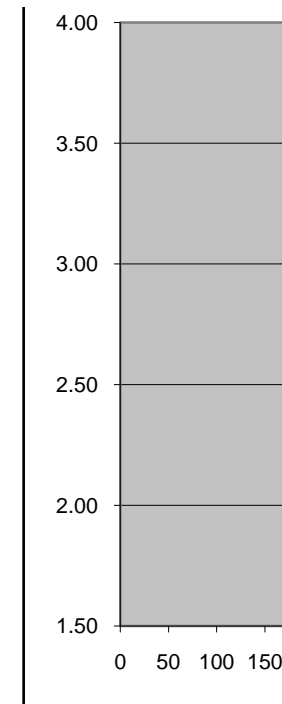















































































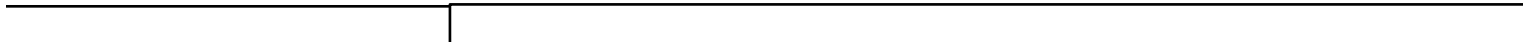

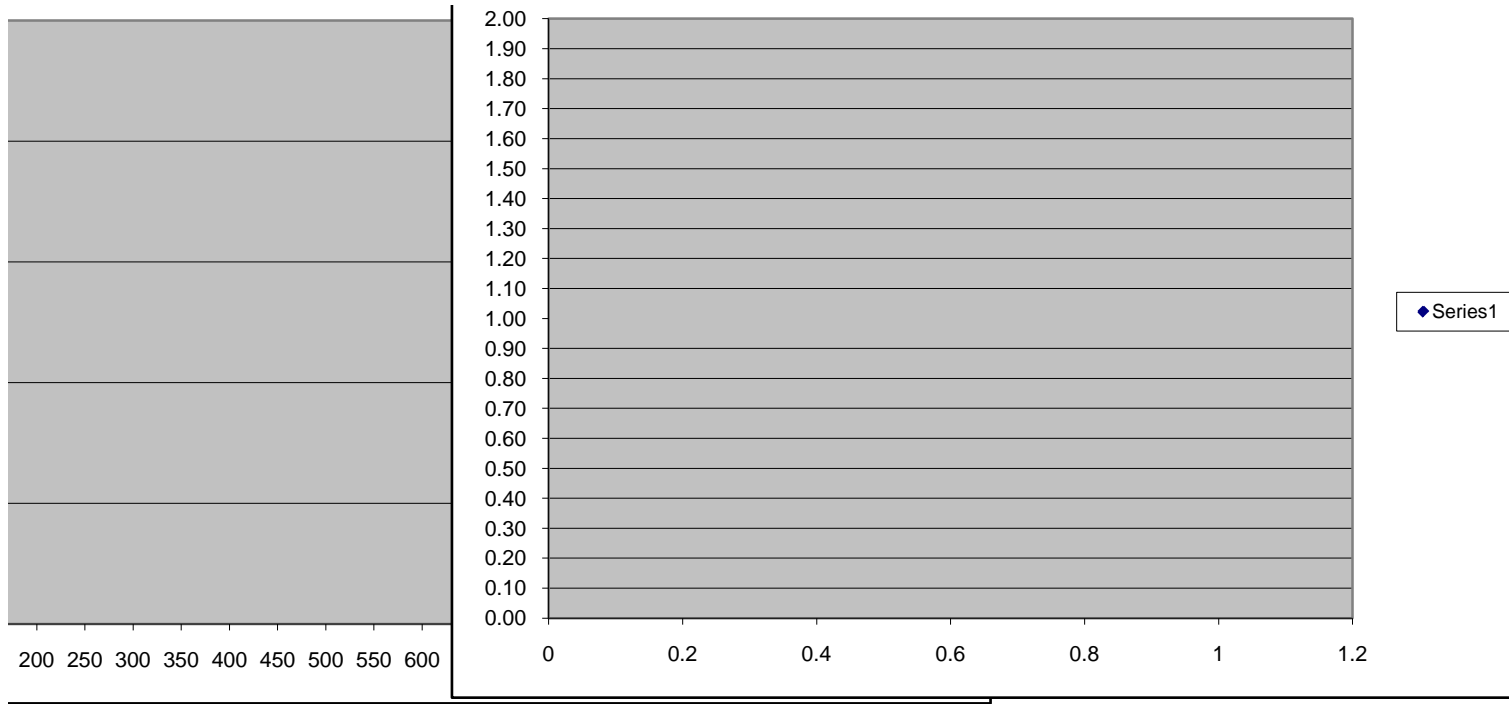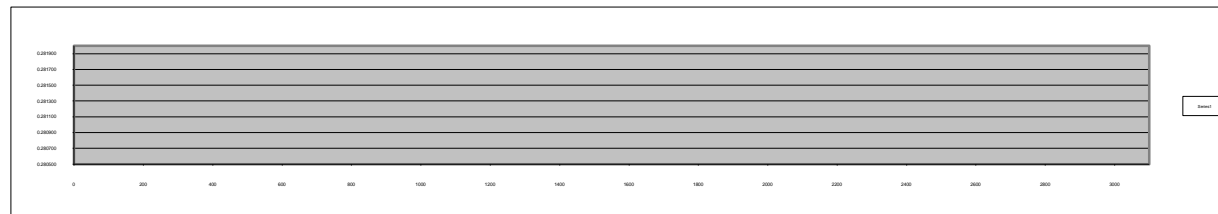





































































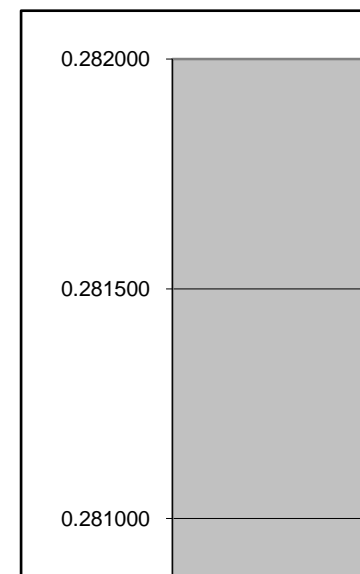

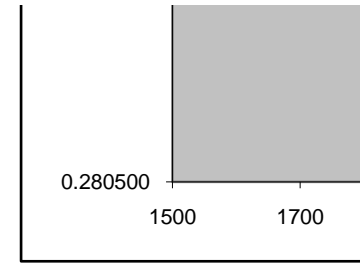

















































































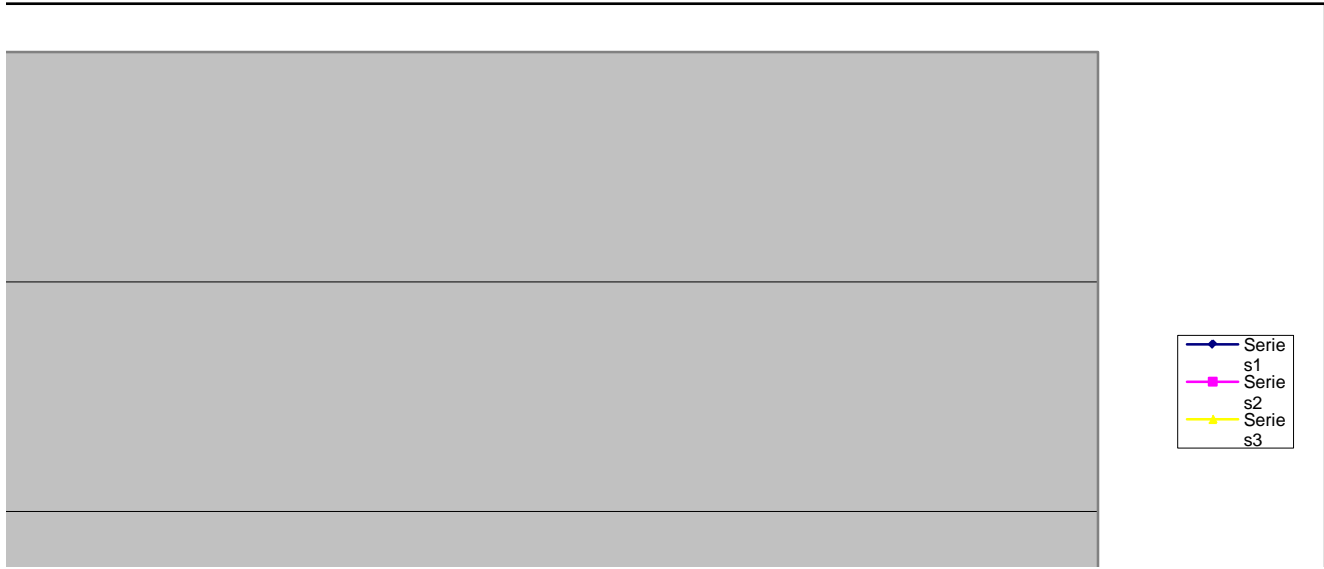

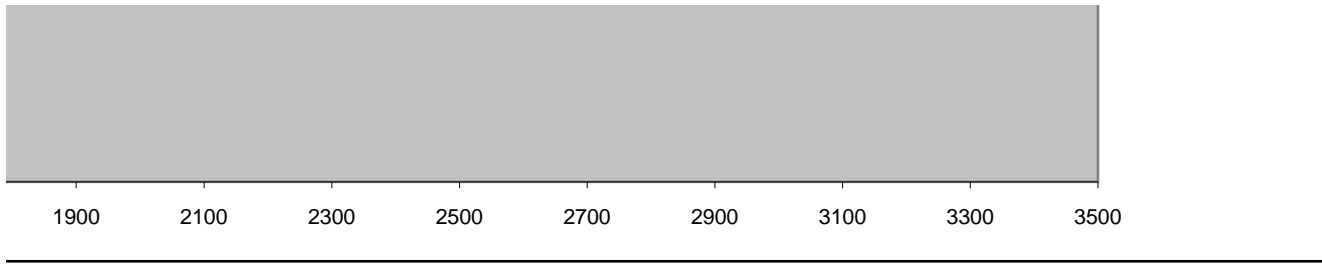

Supplement: Supplementary file 4 [file 1]
