# Supplementary material
Source: publisher figshare collection journal article supplement (https://geolsoc.figshare.com/articles/dataset/_/3452852)
Supplement: Supplementary file 1 [file 1]

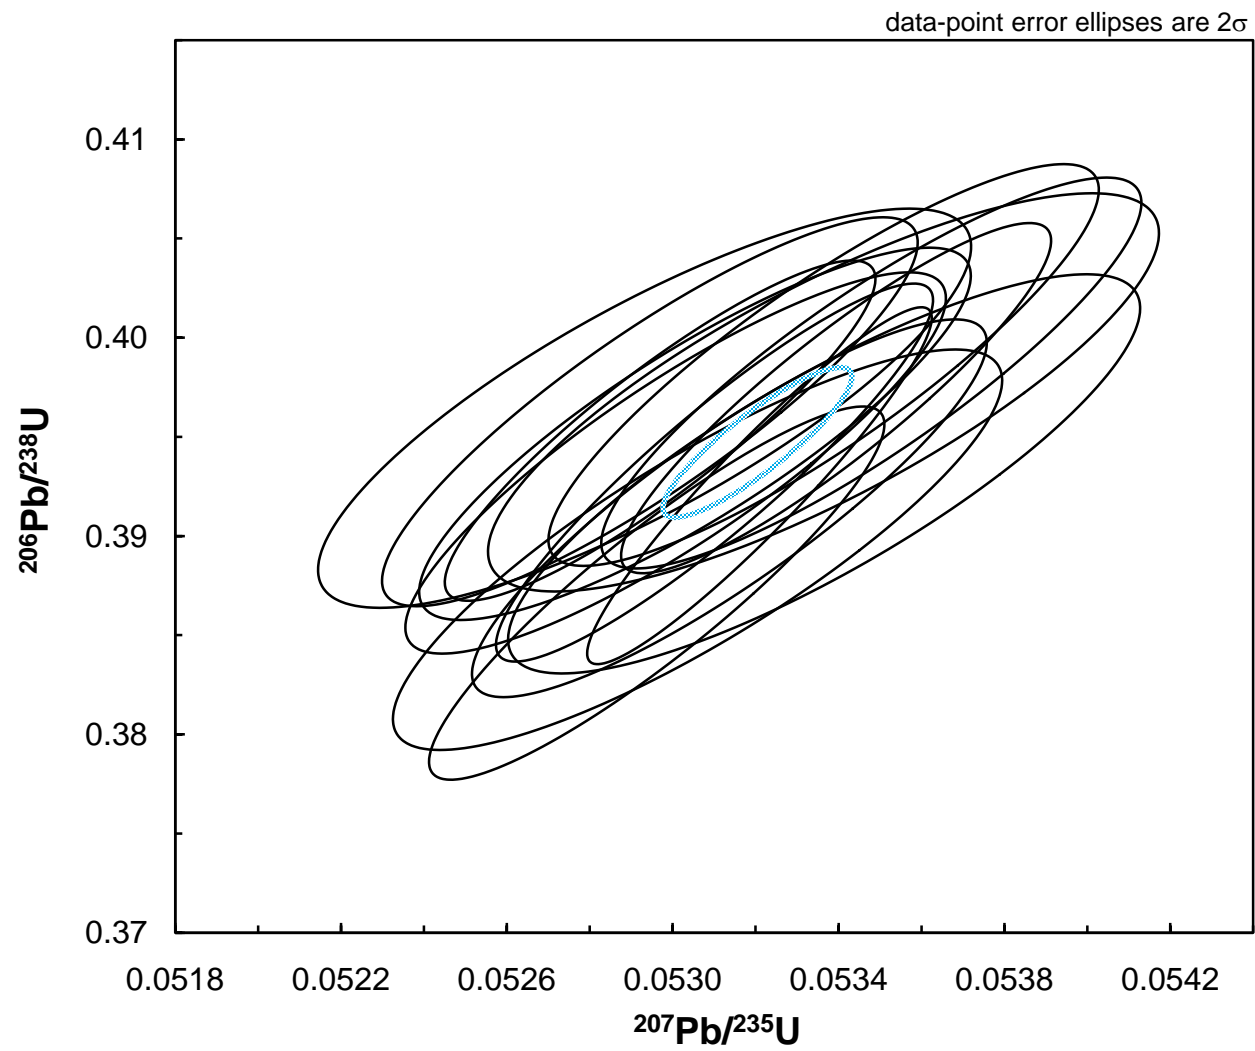

**Table S1: Results of U-Th-Pb isotope analyses**

| zrc-no.            | $^{207}\text{Pb}^a$<br>(cps) | $\text{U}^b$<br>(ppm) | $\text{Pb}^b$<br>(ppm) | $\frac{\text{Th}^b}{\text{U}}$ | $\frac{^{206}\text{Pb}}{^{204}\text{Pb}}$ | $\frac{^{206}\text{Pb}^c}{^{238}\text{U}}$ | $2\sigma$<br>% | $\frac{^{207}\text{Pb}^c}{^{235}\text{U}}$ | $2\sigma$<br>% | $\frac{^{207}\text{Pb}^c}{^{206}\text{Pb}}$ | $2\sigma$<br>% | Rho <sup>d</sup> |
|--------------------|------------------------------|-----------------------|------------------------|--------------------------------|-------------------------------------------|--------------------------------------------|----------------|--------------------------------------------|----------------|---------------------------------------------|----------------|------------------|
| <b>sample AG7</b>  |                              |                       |                        |                                |                                           |                                            |                |                                            |                |                                             |                |                  |
| 1c                 | 20722                        | 37                    | 35                     | 0.37                           | 4860                                      | 0.7402                                     | 2.1            | 32.85                                      | 2.8            | 0.3218                                      | 1.7            | 0.78             |
| 1c                 | 47327                        | 36                    | 36                     | 0.38                           | 14018                                     | 0.7631                                     | 1.6            | 35.384                                     | 1.8            | 0.3363                                      | 0.9            | 0.86             |
| 2c                 | 163734                       | 251                   | 282                    | 0.75                           | 7925                                      | 0.7572                                     | 2.3            | 34.902                                     | 2.5            | 0.3343                                      | 0.8            | 0.94             |
| 3c                 | 55197                        | 98                    | 103                    | 0.50                           | 16286                                     | 0.7633                                     | 2.3            | 35.54                                      | 2.7            | 0.3377                                      | 1.3            | 0.87             |
| 4c                 | 41979                        | 76                    | 75                     | 0.32                           | 12464                                     | 0.7625                                     | 2.0            | 35.30                                      | 2.7            | 0.3358                                      | 1.7            | 0.76             |
| 5c                 | 45756                        | 88                    | 88                     | 0.37                           | 1898                                      | 0.7549                                     | 2.2            | 35.422                                     | 2.7            | 0.3403                                      | 1.5            | 0.82             |
| 6r                 | 148149                       | 543                   | 235                    | 0.01                           | 62561                                     | 0.4031                                     | 2.3            | 13.06                                      | 2.8            | 0.2350                                      | 1.7            | 0.81             |
| 7c                 | 112618                       | 201                   | 211                    | 0.54                           | 3995                                      | 0.7572                                     | 2.3            | 34.994                                     | 2.5            | 0.3352                                      | 1.0            | 0.91             |
| 8c                 | 200223                       | 775                   | 552                    | 0.67                           | 1593                                      | 0.5387                                     | 2.1            | 21.325                                     | 2.6            | 0.2871                                      | 1.6            | 0.79             |
| 9c                 | 38445                        | 31                    | 31                     | 0.36                           | 1867                                      | 0.7585                                     | 2.0            | 35.120                                     | 2.4            | 0.3358                                      | 1.4            | 0.82             |
| 9c                 | 39032                        | 33                    | 32                     | 0.33                           | 4895                                      | 0.7556                                     | 2.1            | 34.617                                     | 2.8            | 0.3323                                      | 1.9            | 0.74             |
| 10c                | 46867                        | 39                    | 37                     | 0.30                           | 14579                                     | 0.7396                                     | 2.8            | 32.628                                     | 3.1            | 0.3200                                      | 1.3            | 0.91             |
| 11c                | 194035                       | 137                   | 153                    | 0.67                           | 8971                                      | 0.7567                                     | 2.3            | 34.82                                      | 2.5            | 0.3337                                      | 1.0            | 0.92             |
| 12c                | 65922                        | 57                    | 57                     | 0.34                           | 19673                                     | 0.7586                                     | 2.0            | 35.03                                      | 2.3            | 0.3349                                      | 1.1            | 0.87             |
| 13c                | 108441                       | 91                    | 93                     | 0.39                           | 4038                                      | 0.7649                                     | 2.1            | 35.495                                     | 2.3            | 0.3366                                      | 0.8            | 0.93             |
| 14r                | 51463                        | 547                   | 87                     | 0.02                           | 4900                                      | 0.1590                                     | 2.8            | 3.077                                      | 3.2            | 0.1404                                      | 1.6            | 0.87             |
| 15c                | 27378                        | 22                    | 21                     | 0.29                           | 8230                                      | 0.7652                                     | 2.0            | 35.00                                      | 2.5            | 0.3317                                      | 1.6            | 0.78             |
| 16c                | 142303                       | 131                   | 130                    | 0.34                           | 42628                                     | 0.7579                                     | 2.2            | 34.77                                      | 2.4            | 0.3327                                      | 1.0            | 0.91             |
| 16c                | 122452                       | 107                   | 100                    | 0.18                           | 10951                                     | 0.7581                                     | 2.2            | 34.26                                      | 2.5            | 0.3278                                      | 1.2            | 0.88             |
| 20c                | 163681                       | 133                   | 145                    | 0.52                           | 5192                                      | 0.7697                                     | 1.7            | 35.94                                      | 2.0            | 0.3387                                      | 0.9            | 0.88             |
| 21c                | 378349                       | 300                   | 266                    | 0.38                           | 6797                                      | 0.6318                                     | 2.5            | 28.53                                      | 2.9            | 0.3276                                      | 1.5            | 0.86             |
| 22c                | 136983                       | 115                   | 119                    | 0.39                           | 15511                                     | 0.7678                                     | 1.6            | 36.36                                      | 1.8            | 0.3434                                      | 0.9            | 0.88             |
| 23c                | 171617                       | 145                   | 149                    | 0.42                           | 12701                                     | 0.7619                                     | 1.8            | 34.93                                      | 2.0            | 0.3325                                      | 0.9            | 0.90             |
| 24c                | 373826                       | 355                   | 358                    | 0.42                           | 607                                       | 0.7162                                     | 1.9            | 32.25                                      | 2.1            | 0.3265                                      | 0.9            | 0.90             |
| 25c                | 64767                        | 60                    | 61                     | 0.35                           | 10831                                     | 0.7651                                     | 2.0            | 35.67                                      | 2.2            | 0.3381                                      | 0.8            | 0.92             |
| 26c                | 167808                       | 140                   | 143                    | 0.41                           | 49634                                     | 0.7606                                     | 1.9            | 35.02                                      | 1.9            | 0.3340                                      | 0.4            | 0.97             |
| 27c                | 93746                        | 113                   | 113                    | 0.33                           | 2395                                      | 0.7666                                     | 3.4            | 35.47                                      | 3.6            | 0.3355                                      | 1.2            | 0.94             |
| 27r                | 158064                       | 488                   | 151                    | 0.00                           | 4043                                      | 0.2884                                     | 3.4            | 8.859                                      | 3.6            | 0.2228                                      | 1.2            | 0.94             |
| 28c                | 67414                        | 57                    | 57                     | 0.28                           | 19485                                     | 0.7698                                     | 1.9            | 36.57                                      | 2.2            | 0.3445                                      | 1.1            | 0.87             |
| 29c                | 148291                       | 135                   | 133                    | 0.37                           | 6572                                      | 0.7338                                     | 1.9            | 34.15                                      | 2.0            | 0.3375                                      | 0.4            | 0.98             |
| 30c                | 311729                       | 394                   | 304                    | 0.24                           | 4060                                      | 0.6129                                     | 1.8            | 24.30                                      | 2.2            | 0.2876                                      | 1.3            | 0.82             |
| 31c                | 92006                        | 80                    | 82                     | 0.33                           | 1444                                      | 0.7627                                     | 1.8            | 35.41                                      | 2.4            | 0.3367                                      | 1.5            | 0.76             |
| 31r                | 301877                       | 574                   | 336                    | 0.01                           | 7283                                      | 0.5387                                     | 2.3            | 18.00                                      | 2.4            | 0.2424                                      | 0.9            | 0.94             |
| 32c                | 97710                        | 88                    | 88                     | 0.31                           | 4619                                      | 0.7628                                     | 2.0            | 35.43                                      | 2.4            | 0.3369                                      | 1.3            | 0.84             |
| 33c                | 255643                       | 242                   | 245                    | 0.47                           | 2901                                      | 0.7227                                     | 2.0            | 32.68                                      | 2.2            | 0.3280                                      | 1.0            | 0.89             |
| 34c                | 108549                       | 102                   | 100                    | 0.30                           | 6891                                      | 0.7567                                     | 1.8            | 34.62                                      | 2.1            | 0.3318                                      | 1.0            | 0.89             |
| 35c                | 123362                       | 104                   | 107                    | 0.38                           | 30053                                     | 0.7717                                     | 2.6            | 35.49                                      | 2.9            | 0.3336                                      | 1.2            | 0.91             |
| 36c                | 60782                        | 55                    | 54                     | 0.29                           | 17835                                     | 0.7669                                     | 1.8            | 35.86                                      | 2.1            | 0.3392                                      | 1.2            | 0.84             |
| 37c                | 217159                       | 287                   | 200                    | 0.00                           | 45714                                     | 0.6439                                     | 2.3            | 22.27                                      | 2.4            | 0.2508                                      | 0.7            | 0.96             |
| 38c                | 127913                       | 115                   | 121                    | 0.44                           | 6387                                      | 0.7653                                     | 2.5            | 35.41                                      | 2.7            | 0.3355                                      | 1.0            | 0.93             |
| <b>sample AG6c</b> |                              |                       |                        |                                |                                           |                                            |                |                                            |                |                                             |                |                  |
| 1c                 | 75235                        | 268                   | 201                    | 0.23                           | 30838                                     | 0.6313                                     | 1.5            | 21.20                                      | 1.9            | 0.2436                                      | 1.1            | 0.82             |
| 2c                 | 55072                        | 172                   | 130                    | 0.32                           | 3612                                      | 0.6195                                     | 1.9            | 20.336                                     | 2.3            | 0.2381                                      | 1.2            | 0.84             |
| 2c                 | 45529                        | 167                   | 124                    | 0.24                           | 2903                                      | 0.6251                                     | 1.4            | 20.791                                     | 1.9            | 0.2412                                      | 1.2            | 0.76             |
| 3c                 | 131284                       | 445                   | 339                    | 0.37                           | 8636                                      | 0.6115                                     | 2.9            | 19.67                                      | 3.2            | 0.2333                                      | 1.2            | 0.93             |
| 4c                 | 65496                        | 379                   | 129                    | 0.12                           | 608                                       | 0.2621                                     | 2.7            | 10.01                                      | 3.5            | 0.2769                                      | 2.1            | 0.79             |
| 4r                 | 65138                        | 389                   | 154                    | 0.06                           | 598                                       | 0.3451                                     | 2.3            | 11.554                                     | 2.9            | 0.2428                                      | 1.8            | 0.78             |
| 5c                 | 79098                        | 181                   | 151                    | 0.40                           | 3340                                      | 0.5990                                     | 1.8            | 27.75                                      | 2.2            | 0.3360                                      | 1.3            | 0.82             |
| 6c                 | 65072                        | 178                   | 147                    | 0.44                           | 272                                       | 0.6114                                     | 2.5            | 19.842                                     | 2.9            | 0.2354                                      | 1.3            | 0.89             |

|     |        |      |     |      |       |        |      |        |      |        |     |      |
|-----|--------|------|-----|------|-------|--------|------|--------|------|--------|-----|------|
| 6c  | 68232  | 255  | 196 | 0.42 | 1209  | 0.6245 | 2.3  | 20.765 | 2.6  | 0.2412 | 1.3 | 0.88 |
| 7c  | 56087  | 185  | 135 | 0.23 | 2073  | 0.6216 | 1.9  | 20.621 | 2.1  | 0.2406 | 0.8 | 0.92 |
| 8c  | 194666 | 826  | 630 | 0.38 | 1930  | 0.6303 | 2.8  | 21.621 | 3.5  | 0.2488 | 2.1 | 0.80 |
| 9c  | 116299 | 474  | 144 | 0.16 | 942   | 0.2064 | 3.2  | 9.518  | 3.3  | 0.3344 | 0.8 | 0.97 |
| 9c  | 115764 | 472  | 302 | 0.18 | 1970  | 0.4998 | 2.4  | 23.260 | 2.6  | 0.3375 | 1.0 | 0.92 |
| 10r | 209243 | 1407 | 714 | 0.01 | 203   | 0.4259 | 1.6  | 14.572 | 2.0  | 0.2481 | 1.2 | 0.80 |
| 11c | 103573 | 849  | 387 | 0.10 | 1159  | 0.4064 | 2.3  | 12.209 | 3.2  | 0.2179 | 2.2 | 0.73 |
| 12c | 15886  | 867  | 54  | 0.02 | 1405  | 0.0611 | 5.4  | 0.9426 | 6.0  | 0.1118 | 2.7 | 0.89 |
| 13c | 69711  | 175  | 126 | 0.04 | 3975  | 0.6480 | 1.8  | 23.035 | 2.0  | 0.2578 | 1.0 | 0.86 |
| 14r | 62843  | 352  | 89  | 0.00 | 14627 | 0.2335 | 3.5  | 8.091  | 4.3  | 0.2513 | 2.5 | 0.81 |
| 15c | 64900  | 94   | 101 | 0.53 | 405   | 0.7561 | 1.8  | 34.69  | 2.6  | 0.3328 | 1.9 | 0.69 |
| 15c | 62275  | 117  | 27  | 0.27 | 2837  | 0.1187 | 13.5 | 5.232  | 13.7 | 0.3195 | 2.5 | 0.98 |
| 16c | 55873  | 147  | 59  | 0.14 | 2513  | 0.3210 | 4.8  | 13.261 | 5.2  | 0.2997 | 2.1 | 0.91 |
| 17c | 72061  | 138  | 121 | 0.46 | 1138  | 0.6412 | 1.7  | 30.334 | 2.1  | 0.3431 | 1.1 | 0.83 |
| 18c | 44368  | 65   | 65  | 0.40 | 3115  | 0.7594 | 2.2  | 35.46  | 2.6  | 0.3386 | 1.3 | 0.86 |
| 18c | 48876  | 74   | 78  | 0.44 | 912   | 0.7661 | 1.7  | 36.786 | 1.9  | 0.3482 | 0.9 | 0.88 |
| 18r | 70377  | 250  | 74  | 0.04 | 1234  | 0.2606 | 3.7  | 9.582  | 4.6  | 0.2667 | 2.6 | 0.82 |
| 19c | 51543  | 93   | 78  | 0.41 | 1444  | 0.6119 | 2.2  | 29.05  | 2.4  | 0.3443 | 0.9 | 0.92 |
| 20c | 53240  | 170  | 104 | 0.29 | 6456  | 0.5053 | 2.0  | 16.821 | 2.4  | 0.2414 | 1.4 | 0.82 |
| 20c | 48573  | 149  | 112 | 0.29 | 16260 | 0.6278 | 1.6  | 21.33  | 2.0  | 0.2464 | 1.1 | 0.83 |
| 21c | 60402  | 929  | 135 | 0.05 | 425   | 0.1307 | 5.0  | 2.64   | 5.7  | 0.1463 | 2.6 | 0.89 |
| 21r | 85981  | 972  | 257 | 0.08 | 255   | 0.2265 | 3.3  | 6.193  | 3.7  | 0.1984 | 1.7 | 0.89 |
| 22c | 143134 | 471  | 303 | 0.49 | 1565  | 0.4934 | 1.9  | 20.10  | 2.4  | 0.2955 | 1.4 | 0.80 |
| 23c | 29078  | 79   | 67  | 0.60 | 12114 | 0.6249 | 2.3  | 20.752 | 2.7  | 0.2408 | 1.5 | 0.83 |
| 24c | 63286  | 89   | 95  | 0.44 | 589   | 0.7570 | 2.8  | 35.05  | 3.4  | 0.3358 | 1.9 | 0.83 |
| 24r | 36623  | 932  | 93  | 0.00 | 7251  | 0.1024 | 4.9  | 1.811  | 5.3  | 0.1283 | 2.0 | 0.92 |
| 25c | 58285  | 187  | 131 | 0.60 | 368   | 0.5755 | 2.5  | 20.929 | 2.8  | 0.2637 | 1.3 | 0.88 |
| 25c | 130923 | 439  | 302 | 0.24 | 1811  | 0.5911 | 2.7  | 19.634 | 2.8  | 0.2409 | 0.8 | 0.96 |
| 26c | 90940  | 141  | 145 | 0.46 | 9468  | 0.7533 | 2.1  | 34.815 | 2.5  | 0.3352 | 1.4 | 0.83 |
| 27c | 117776 | 175  | 196 | 0.73 | 453   | 0.7626 | 3.7  | 36.098 | 4.0  | 0.3433 | 1.5 | 0.93 |
| 27r | 81332  | 89   | 107 | 0.57 | 230   | 0.7363 | 3.9  | 32.608 | 4.1  | 0.3212 | 1.3 | 0.95 |
| 29c | 97522  | 332  | 244 | 0.10 | 1905  | 0.6434 | 1.6  | 22.499 | 1.9  | 0.2536 | 1.1 | 0.82 |
| 27r | 128129 | 248  | 169 | 0.06 | 2643  | 0.5952 | 1.5  | 24.436 | 2.2  | 0.2978 | 1.6 | 0.70 |

**sampleAG6a**

|     |        |     |     |      |       |        |     |       |     |        |     |      |
|-----|--------|-----|-----|------|-------|--------|-----|-------|-----|--------|-----|------|
| 1c  | 55380  | 119 | 82  | 0.02 | 6464  | 0.6320 | 1.5 | 21.76 | 1.8 | 0.2497 | 1.0 | 0.83 |
| 2c  | 71056  | 135 | 134 | 0.33 | 22997 | 0.7768 | 2.6 | 33.18 | 3.0 | 0.3097 | 1.6 | 0.86 |
| 2r  | 34306  | 113 | 54  | 0.06 | 1961  | 0.4225 | 2.6 | 15.20 | 3.0 | 0.2609 | 1.5 | 0.86 |
| 2r  | 31473  | 93  | 56  | 0.01 | 12585 | 0.5435 | 2.9 | 18.81 | 3.2 | 0.2510 | 1.3 | 0.91 |
| 4c  | 24982  | 64  | 44  | 0.00 | 9903  | 0.6422 | 2.6 | 22.40 | 2.8 | 0.2530 | 1.0 | 0.93 |
| 5c  | 89697  | 802 | 206 | 0.04 | 9367  | 0.2417 | 4.7 | 5.493 | 5.0 | 0.1648 | 1.5 | 0.96 |
| 6c  | 115496 | 883 | 220 | 0.05 | 4140  | 0.2444 | 2.0 | 4.457 | 2.4 | 0.1323 | 1.3 | 0.85 |
| 7c  | 165790 | 644 | 204 | 0.25 | 24159 | 0.1824 | 4.4 | 4.584 | 6.0 | 0.1822 | 4.1 | 0.74 |
| 8c  | 67962  | 180 | 125 | 0.02 | 11370 | 0.6356 | 3.0 | 21.61 | 3.3 | 0.2466 | 1.4 | 0.90 |
| 8c  | 50261  | 150 | 102 | 0.04 | 20872 | 0.6196 | 3.1 | 20.59 | 3.3 | 0.2410 | 1.0 | 0.95 |
| 9c  | 29050  | 108 | 84  | 0.21 | 1485  | 0.6556 | 1.9 | 23.27 | 2.3 | 0.2574 | 1.4 | 0.81 |
| 9c  | 29557  | 88  | 63  | 0.02 | 1899  | 0.6488 | 1.9 | 22.88 | 2.4 | 0.2558 | 1.5 | 0.79 |
| 10c | 32837  | 91  | 65  | 0.01 | 12790 | 0.6527 | 2.8 | 23.11 | 3.2 | 0.2568 | 1.6 | 0.86 |
| 11c | 157766 | 355 | 260 | 0.28 | 157   | 0.4938 | 4.0 | 20.02 | 4.5 | 0.2940 | 2.0 | 0.89 |
| 11r | 189081 | 694 | 435 | 0.02 | 3209  | 0.5855 | 2.0 | 17.22 | 2.1 | 0.2133 | 0.9 | 0.92 |
| 12c | 27689  | 38  | 37  | 0.78 | 3772  | 0.6514 | 2.9 | 23.18 | 3.4 | 0.2581 | 1.8 | 0.85 |
| 13c | 130958 | 340 | 211 | 0.12 | 1016  | 0.5223 | 2.1 | 19.15 | 2.5 | 0.2659 | 1.3 | 0.85 |
| 14c | 60656  | 153 | 96  | 0.02 | 3033  | 0.5634 | 2.1 | 20.08 | 2.4 | 0.2585 | 1.2 | 0.87 |
| 15c | 72841  | 256 | 186 | 0.41 | 26476 | 0.5795 | 3.3 | 21.97 | 3.7 | 0.2749 | 1.7 | 0.89 |

|     |       |     |     |      |       |        |     |       |     |        |     |      |
|-----|-------|-----|-----|------|-------|--------|-----|-------|-----|--------|-----|------|
| 16c | 59987 | 397 | 140 | 0.44 | 2097  | 0.2468 | 5.4 | 8.158 | 5.5 | 0.2397 | 1.2 | 0.98 |
| 17c | 43801 | 81  | 58  | 0.03 | 10413 | 0.6506 | 2.0 | 22.80 | 2.6 | 0.2542 | 1.7 | 0.76 |
| 18c | 2157  | 6   | 4   | 0.02 | 874   | 0.6310 | 3.3 | 21.52 | 4.7 | 0.2473 | 3.4 | 0.69 |
| 19c | 89872 | 935 | 322 | 0.04 | 2204  | 0.3382 | 4.3 | 6.806 | 5.1 | 0.1460 | 2.8 | 0.83 |

**sample AG6b**

|     |        |     |     |      |       |        |      |        |      |        |     |      |
|-----|--------|-----|-----|------|-------|--------|------|--------|------|--------|-----|------|
| 2c  | 46415  | 296 | 62  | 0.31 | 22661 | 0.1647 | 3.3  | 4.631  | 3.5  | 0.2039 | 1.3 | 0.93 |
| 3c  | 87879  | 137 | 116 | 0.43 | 1976  | 0.6505 | 3.6  | 23.10  | 4.0  | 0.2576 | 1.7 | 0.91 |
| 4c  | 76691  | 107 | 46  | 0.02 | 6142  | 0.3825 | 3.4  | 14.734 | 3.9  | 0.2794 | 1.9 | 0.88 |
| 4r  | 32723  | 100 | 29  | 0.10 | 723   | 0.2343 | 5.7  | 7.931  | 6.1  | 0.2455 | 2.2 | 0.93 |
| 5c  | 51388  | 82  | 66  | 0.30 | 679   | 0.6208 | 1.9  | 21.65  | 2.7  | 0.2529 | 1.9 | 0.71 |
| 6c  | 16186  | 22  | 18  | 0.23 | 6240  | 0.6516 | 3.4  | 23.29  | 4.1  | 0.2592 | 2.2 | 0.84 |
| 7c  | 123283 | 235 | 108 | 0.04 | 680   | 0.3838 | 2.5  | 13.46  | 2.9  | 0.2544 | 1.6 | 0.85 |
| 8c  | 91668  | 134 | 108 | 0.30 | 7551  | 0.6493 | 2.1  | 22.95  | 2.5  | 0.2564 | 1.3 | 0.86 |
| 9c  | 21013  | 31  | 23  | 0.05 | 3785  | 0.6502 | 2.0  | 23.20  | 2.3  | 0.2588 | 1.1 | 0.88 |
| 9c  | 18618  | 32  | 23  | 0.06 | 4579  | 0.6467 | 1.9  | 22.76  | 2.7  | 0.2552 | 1.9 | 0.72 |
| 10c | 191796 | 275 | 260 | 0.48 | 75588 | 0.7448 | 1.9  | 25.95  | 2.1  | 0.2527 | 0.9 | 0.90 |
| 11c | 38390  | 95  | 39  | 0.06 | 1315  | 0.3559 | 3.0  | 12.75  | 3.9  | 0.2599 | 2.4 | 0.79 |
| 12c | 82627  | 338 | 144 | 0.69 | 36842 | 0.3180 | 2.0  | 9.788  | 2.3  | 0.2233 | 1.0 | 0.90 |
| 13r | 52124  | 74  | 56  | 0.29 | 21191 | 0.6242 | 2.7  | 21.10  | 3.0  | 0.2451 | 1.3 | 0.90 |
| 14c | 52914  | 111 | 78  | 0.41 | 1882  | 0.6455 | 1.8  | 22.54  | 2.6  | 0.2532 | 1.9 | 0.68 |
| 15c | 20452  | 33  | 23  | 0.24 | 8029  | 0.6453 | 2.3  | 22.70  | 3.1  | 0.2551 | 2.0 | 0.75 |
| 16c | 18675  | 352 | 27  | 0.08 | 303   | 0.0796 | 3.4  | 1.410  | 6.0  | 0.1285 | 5.0 | 0.57 |
| 17c | 33403  | 87  | 31  | 0.47 | 1307  | 0.3336 | 3.4  | 11.71  | 3.8  | 0.2546 | 1.7 | 0.90 |
| 19c | 422985 | 146 | 13  | 0.53 | 81    | 0.0821 | 37.7 | 2.933  | 38.0 | 0.2592 | 4.7 | 0.99 |
| 20c | 24631  | 42  | 29  | 0.10 | 6214  | 0.6502 | 1.8  | 23.07  | 2.5  | 0.2574 | 1.7 | 0.72 |
| 21c | 37841  | 314 | 104 | 0.58 | 576   | 0.3190 | 2.1  | 8.645  | 2.7  | 0.1966 | 1.7 | 0.77 |
| 22c | 309279 | 659 | 367 | 0.35 | 482   | 0.5261 | 1.7  | 16.02  | 2.4  | 0.2208 | 1.8 | 0.69 |
| 23c | 25791  | 61  | 32  | 0.20 | 1613  | 0.4815 | 3.8  | 17.23  | 4.4  | 0.2595 | 2.2 | 0.86 |
| 24c | 24828  | 46  | 33  | 0.28 | 1098  | 0.6570 | 2.6  | 23.58  | 3.1  | 0.2604 | 1.7 | 0.83 |
| 25c | 97369  | 218 | 142 | 0.08 | 573   | 0.6086 | 4.3  | 19.79  | 4.4  | 0.2358 | 1.1 | 0.97 |
| 26c | 74240  | 118 | 99  | 0.26 | 2071  | 0.7393 | 2.1  | 32.41  | 2.9  | 0.3179 | 2.0 | 0.73 |
| 27c | 88544  | 548 | 82  | 0.06 | 578   | 0.1445 | 2.4  | 3.797  | 2.8  | 0.1906 | 1.4 | 0.87 |
| 28c | 249804 | 778 | 373 | 0.06 | 373   | 0.4473 | 2.0  | 14.68  | 2.3  | 0.2380 | 0.9 | 0.91 |
| 29c | 82717  | 181 | 96  | 0.28 | 8710  | 0.4714 | 2.3  | 20.04  | 2.7  | 0.3083 | 1.5 | 0.84 |
| 30c | 15288  | 27  | 19  | 0.11 | 5883  | 0.6464 | 4.5  | 23.18  | 5.0  | 0.2601 | 2.3 | 0.89 |
| 31c | 54415  | 161 | 68  | 0.39 | 1089  | 0.3846 | 4.0  | 13.84  | 4.5  | 0.2610 | 2.0 | 0.89 |
| 32c | 39214  | 93  | 57  | 0.04 | 15731 | 0.5629 | 2.8  | 19.29  | 3.4  | 0.2486 | 2.0 | 0.82 |
| 33c | 52846  | 663 | 84  | 0.03 | 296   | 0.1243 | 2.8  | 3.024  | 3.5  | 0.1764 | 2.1 | 0.80 |
| 34c | 34351  | 63  | 45  | 0.08 | 1493  | 0.6558 | 1.9  | 23.41  | 2.4  | 0.2589 | 1.4 | 0.81 |

**sample SW26**

|     |        |      |     |      |       |        |     |       |     |        |     |      |
|-----|--------|------|-----|------|-------|--------|-----|-------|-----|--------|-----|------|
| 1c  | 38305  | 976  | 100 | 0.26 | 231   | 0.0701 | 2.5 | 1.358 | 4.4 | 0.1405 | 3.5 | 0.58 |
| 2c  | 37694  | 1154 | 134 | 0.02 | 948   | 0.1002 | 2.6 | 2.035 | 3.1 | 0.1473 | 1.7 | 0.85 |
| 3c  | 41091  | 78   | 75  | 0.46 | 13087 | 0.7315 | 2.4 | 31.67 | 2.6 | 0.3140 | 1.0 | 0.92 |
| 4c  | 116686 | 289  | 281 | 0.79 | 1112  | 0.7307 | 2.2 | 31.54 | 2.3 | 0.3130 | 0.5 | 0.97 |
| 5c  | 70242  | 880  | 175 | 0.08 | 1306  | 0.1774 | 1.7 | 5.019 | 2.2 | 0.2052 | 1.4 | 0.78 |
| 5c  | 142634 | 722  | 226 | 0.17 | 18997 | 0.2660 | 2.4 | 9.257 | 2.8 | 0.2524 | 1.5 | 0.85 |
| 6c  | 63544  | 1085 | 168 | 0.16 | 654   | 0.1309 | 2.4 | 3.490 | 2.6 | 0.1933 | 1.0 | 0.92 |
| 4c  | 151878 | 305  | 304 | 0.40 | 949   | 0.7306 | 2.5 | 31.73 | 2.6 | 0.3150 | 0.9 | 0.94 |
| 8c  | 74070  | 177  | 155 | 0.49 | 4199  | 0.6543 | 3.0 | 27.22 | 3.1 | 0.3018 | 0.9 | 0.96 |
| 9c  | 62689  | 157  | 124 | 0.20 | 8907  | 0.6547 | 1.6 | 25.81 | 1.8 | 0.2859 | 0.8 | 0.90 |
| 10c | 46638  | 1089 | 86  | 0.04 | 588   | 0.0648 | 2.6 | 1.428 | 4.9 | 0.1599 | 4.1 | 0.53 |
| 11c | 41159  | 1414 | 159 | 0.29 | 326   | 0.0928 | 2.2 | 1.669 | 3.6 | 0.1305 | 2.9 | 0.60 |

**sample DA16**

|         |        |     |     |      |       |        |      |       |      |        |     |      |
|---------|--------|-----|-----|------|-------|--------|------|-------|------|--------|-----|------|
| 1c      | 71493  | 182 | 169 | 0.52 | 992   | 0.6448 | 3.3  | 22.65 | 3.6  | 0.2547 | 1.5 | 0.91 |
| 2c      | 152192 | 486 | 289 | 0.08 | 63114 | 0.5354 | 2.7  | 17.81 | 3.3  | 0.2413 | 1.8 | 0.83 |
| 3c      | 91870  | 336 | 53  | 0.25 | 5024  | 0.0786 | 29.9 | 2.724 | 30.0 | 0.2512 | 2.4 | 1.00 |
| 4c      | 95912  | 302 | 194 | 0.01 | 14371 | 0.5893 | 4.8  | 20.60 | 4.9  | 0.2535 | 1.0 | 0.98 |
| 5c      | 89805  | 264 | 190 | 0.03 | 5606  | 0.6446 | 2.6  | 22.41 | 2.8  | 0.2522 | 1.1 | 0.92 |
| 6c      | 73456  | 147 | 104 | 0.00 | 29279 | 0.6500 | 3.0  | 22.55 | 3.2  | 0.2516 | 1.1 | 0.94 |
| 7c      | 99405  | 245 | 167 | 0.01 | 7083  | 0.6249 | 3.3  | 21.86 | 3.6  | 0.2537 | 1.4 | 0.92 |
| 8c-old  | 30685  | 63  | 54  | 0.52 | 3471  | 0.7005 | 2.1  | 28.15 | 3.2  | 0.2915 | 2.4 | 0.65 |
| 8r      | 109187 | 507 | 326 | 0.05 | 4597  | 0.5931 | 2.5  | 18.23 | 3.8  | 0.2230 | 2.9 | 0.65 |
| 9c      | 120717 | 323 | 249 | 0.07 | 1462  | 0.6470 | 2.5  | 22.77 | 3.0  | 0.2552 | 1.6 | 0.83 |
| 10c     | 174559 | 322 | 236 | 0.04 | 7187  | 0.6425 | 3.9  | 22.49 | 4.1  | 0.2538 | 1.4 | 0.94 |
| 11c-old | 80933  | 146 | 119 | 0.07 | 6282  | 0.7047 | 2.8  | 28.73 | 3.9  | 0.2957 | 2.7 | 0.73 |
| 12c     | 157628 | 450 | 316 | 0.05 | 47461 | 0.6365 | 2.9  | 21.83 | 3.2  | 0.2488 | 1.2 | 0.92 |
| 12r     | 117164 | 281 | 199 | 0.05 | 46391 | 0.6440 | 3.9  | 22.45 | 4.0  | 0.2528 | 0.9 | 0.97 |
| 13c     | 410468 | 605 | 547 | 0.41 | 1071  | 0.4430 | 2.5  | 13.03 | 2.8  | 0.2133 | 1.3 | 0.88 |
| 14c     | 97183  | 322 | 227 | 0.01 | 12431 | 0.6430 | 4.2  | 22.44 | 5.2  | 0.2531 | 2.9 | 0.82 |
| 15c     | 96445  | 278 | 202 | 0.10 | 20151 | 0.6501 | 2.2  | 22.58 | 2.5  | 0.2519 | 1.2 | 0.88 |
| 16c     | 79904  | 246 | 101 | 0.00 | 32501 | 0.3785 | 5.3  | 12.94 | 5.8  | 0.2480 | 2.3 | 0.91 |
| 17c     | 70290  | 185 | 132 | 0.05 | 27794 | 0.6424 | 2.4  | 22.46 | 2.7  | 0.2536 | 1.4 | 0.86 |
| 18c     | 94070  | 202 | 155 | 0.18 | 32785 | 0.6516 | 2.9  | 22.97 | 3.1  | 0.2557 | 1.1 | 0.93 |
| 19c     | 116967 | 373 | 257 | 0.01 | 6130  | 0.6250 | 2.5  | 20.80 | 2.8  | 0.2413 | 1.1 | 0.91 |
| 20c     | 63489  | 202 | 142 | 0.01 | 22958 | 0.6454 | 1.7  | 22.52 | 2.2  | 0.2531 | 1.3 | 0.79 |
| 21c     | 88317  | 237 | 169 | 0.03 | 4541  | 0.6478 | 4.2  | 22.72 | 4.8  | 0.2544 | 2.4 | 0.87 |
| 22c     | 110922 | 253 | 180 | 0.02 | 6454  | 0.6419 | 1.8  | 22.58 | 2.2  | 0.2552 | 1.3 | 0.82 |
| 23c     | 105116 | 271 | 190 | 0.01 | 23758 | 0.6448 | 3.6  | 22.52 | 4.2  | 0.2533 | 2.2 | 0.85 |
| 23c     | 80787  | 214 | 153 | 0.01 | 10941 | 0.6513 | 2.5  | 23.11 | 2.9  | 0.2573 | 1.6 | 0.84 |

**sample DA17**

|     |        |    |    |      |       |        |     |        |     |        |     |      |
|-----|--------|----|----|------|-------|--------|-----|--------|-----|--------|-----|------|
| 1c  | 18440  | 19 | 19 | 0.50 | 2514  | 0.7085 | 1.8 | 28.86  | 2.6 | 0.2955 | 1.8 | 0.72 |
| 2c  | 16547  | 21 | 20 | 0.51 | 1747  | 0.7048 | 3.3 | 28.97  | 4.3 | 0.2981 | 2.8 | 0.76 |
| 3c  | 47948  | 65 | 64 | 0.62 | 10268 | 0.7045 | 2.9 | 29.11  | 3.1 | 0.2997 | 1.2 | 0.92 |
| 4c  | 21845  | 18 | 17 | 0.49 | 7407  | 0.7087 | 2.6 | 28.84  | 3.5 | 0.2951 | 2.3 | 0.75 |
| 4c  | 36278  | 27 | 25 | 0.35 | 5793  | 0.7061 | 3.5 | 28.77  | 3.7 | 0.2955 | 1.3 | 0.94 |
| 5c  | 47427  | 40 | 36 | 0.32 | 15981 | 0.7090 | 2.4 | 28.99  | 2.7 | 0.2965 | 1.3 | 0.87 |
| 6c  | 24522  | 21 | 19 | 0.38 | 1249  | 0.7000 | 2.9 | 28.11  | 3.7 | 0.2912 | 2.4 | 0.77 |
| 7c  | 71547  | 56 | 52 | 0.33 | 11792 | 0.7129 | 2.3 | 29.52  | 2.6 | 0.3003 | 1.1 | 0.91 |
| 8c  | 31712  | 24 | 23 | 0.41 | 10718 | 0.7060 | 2.6 | 28.73  | 3.1 | 0.2952 | 1.7 | 0.83 |
| 9c  | 34179  | 28 | 28 | 0.54 | 11409 | 0.7131 | 2.7 | 29.46  | 3.0 | 0.2996 | 1.3 | 0.90 |
| 10c | 37441  | 27 | 26 | 0.37 | 12551 | 0.7146 | 1.9 | 29.38  | 2.3 | 0.2982 | 1.3 | 0.83 |
| 11c | 33361  | 26 | 24 | 0.41 | 11286 | 0.7064 | 3.7 | 28.797 | 4.0 | 0.2957 | 1.5 | 0.92 |
| 13c | 19864  | 27 | 28 | 0.65 | 6600  | 0.7165 | 3.3 | 29.709 | 3.7 | 0.3007 | 1.7 | 0.89 |
| 14c | 30834  | 41 | 40 | 0.53 | 10325 | 0.7102 | 3.7 | 29.26  | 4.1 | 0.2988 | 1.8 | 0.90 |
| 14r | 70673  | 95 | 97 | 0.15 | 23650 | 0.8496 | 2.0 | 35.00  | 2.3 | 0.2988 | 1.1 | 0.87 |
| 15c | 24332  | 20 | 20 | 0.57 | 5752  | 0.7053 | 2.2 | 28.93  | 3.0 | 0.2975 | 2.0 | 0.74 |
| 15r | 26746  | 21 | 21 | 0.58 | 1103  | 0.7019 | 3.1 | 28.60  | 3.7 | 0.2955 | 2.1 | 0.83 |
| 16c | 35051  | 27 | 25 | 0.36 | 11797 | 0.7053 | 3.0 | 29.01  | 3.4 | 0.2983 | 1.6 | 0.89 |
| 17c | 39572  | 32 | 31 | 0.25 | 13080 | 0.7674 | 3.0 | 32.03  | 3.4 | 0.3028 | 1.6 | 0.88 |
| 18c | 39612  | 29 | 31 | 0.56 | 2651  | 0.7086 | 3.5 | 29.12  | 4.1 | 0.2981 | 2.1 | 0.86 |
| 20c | 9248   | 7  | 7  | 0.44 | 3110  | 0.7086 | 4.6 | 29.08  | 5.1 | 0.2976 | 2.2 | 0.90 |
| 21c | 5112   | 4  | 4  | 0.40 | 1704  | 0.7106 | 3.9 | 29.35  | 5.3 | 0.2996 | 3.6 | 0.74 |
| 22c | 29720  | 26 | 25 | 0.40 | 3492  | 0.7046 | 3.8 | 28.52  | 4.4 | 0.2936 | 2.1 | 0.87 |
| 23c | 159194 | 57 | 63 | 0.43 | 30395 | 0.8463 | 2.0 | 34.89  | 2.3 | 0.2990 | 1.0 | 0.89 |
| 24c | 213006 | 73 | 74 | 0.33 | 10349 | 0.8210 | 1.8 | 32.84  | 2.0 | 0.2901 | 0.8 | 0.91 |
| 24c | 14741  | 22 | 20 | 0.40 | 5003  | 0.7028 | 3.1 | 28.57  | 4.2 | 0.2948 | 2.8 | 0.74 |

**sample DA18**

|     |        |     |     |      |       |        |     |       |     |        |     |      |
|-----|--------|-----|-----|------|-------|--------|-----|-------|-----|--------|-----|------|
| 2c  | 174014 | 613 | 330 | 0.84 | 1285  | 0.3141 | 3.7 | 10.24 | 4.0 | 0.2364 | 1.5 | 0.93 |
| 3c  | 45190  | 72  | 63  | 0.30 | 15471 | 0.7018 | 3.1 | 28.39 | 3.8 | 0.2934 | 2.1 | 0.83 |
| 3r  | 178874 | 285 | 237 | 0.16 | 44534 | 0.6990 | 2.1 | 28.14 | 2.6 | 0.2919 | 1.4 | 0.83 |
| 5c  | 158008 | 366 | 315 | 0.46 | 19261 | 0.6608 | 3.7 | 26.05 | 4.0 | 0.2859 | 1.4 | 0.94 |
| 6c  | 89912  | 224 | 150 | 0.31 | 3016  | 0.5297 | 2.1 | 19.00 | 2.8 | 0.2601 | 1.8 | 0.76 |
| 7c  | 101020 | 171 | 157 | 0.37 | 5568  | 0.7050 | 2.2 | 28.58 | 2.6 | 0.2941 | 1.4 | 0.84 |
| 8c  | 94287  | 176 | 148 | 0.41 | 32791 | 0.6558 | 2.7 | 25.94 | 3.5 | 0.2869 | 2.2 | 0.78 |
| 9c  | 131043 | 201 | 183 | 0.34 | 44780 | 0.7018 | 3.2 | 28.30 | 3.5 | 0.2925 | 1.4 | 0.92 |
| 10c | 162806 | 328 | 273 | 0.48 | 7982  | 0.6221 | 3.1 | 24.70 | 4.0 | 0.2880 | 2.5 | 0.78 |
| 11c | 72831  | 134 | 121 | 0.36 | 18105 | 0.7039 | 2.5 | 28.66 | 3.2 | 0.2953 | 1.9 | 0.81 |
| 12c | 54398  | 93  | 85  | 0.35 | 2848  | 0.7008 | 2.8 | 28.27 | 3.4 | 0.2925 | 2.0 | 0.81 |
| 12r | 80455  | 224 | 117 | 0.03 | 6406  | 0.4680 | 2.5 | 16.21 | 3.4 | 0.2511 | 2.3 | 0.74 |
| 13r | 91527  | 158 | 143 | 0.32 | 5768  | 0.7050 | 3.6 | 28.63 | 3.9 | 0.2945 | 1.5 | 0.92 |
| 14c | 96218  | 236 | 125 | 0.41 | 13239 | 0.3972 | 3.3 | 15.45 | 3.7 | 0.2821 | 1.8 | 0.87 |
| 13c | 74659  | 134 | 121 | 0.33 | 3044  | 0.7054 | 2.7 | 28.63 | 3.3 | 0.2944 | 1.9 | 0.82 |
| 13r | 70179  | 118 | 106 | 0.32 | 23721 | 0.7071 | 1.8 | 28.87 | 2.3 | 0.2961 | 1.5 | 0.78 |
| 14c | 90153  | 149 | 137 | 0.35 | 30668 | 0.7084 | 3.3 | 28.88 | 4.8 | 0.2957 | 3.5 | 0.68 |
| 15c | 72739  | 114 | 111 | 0.52 | 24877 | 0.7003 | 1.9 | 28.21 | 2.4 | 0.2922 | 1.5 | 0.79 |
| 16c | 54305  | 87  | 83  | 1.38 | 6989  | 0.6975 | 2.7 | 27.97 | 3.1 | 0.2908 | 1.5 | 0.87 |
| 17c | 54297  | 99  | 93  | 0.41 | 7642  | 0.7099 | 2.3 | 29.03 | 3.0 | 0.2966 | 1.9 | 0.76 |
| 18c | 37313  | 66  | 61  | 0.37 | 11450 | 0.7038 | 2.4 | 28.48 | 3.3 | 0.2935 | 2.2 | 0.73 |
| 19c | 47962  | 109 | 76  | 0.19 | 3038  | 0.5581 | 1.7 | 22.14 | 2.3 | 0.2877 | 1.5 | 0.74 |
| 20c | 53442  | 97  | 89  | 0.37 | 1941  | 0.7037 | 2.0 | 28.55 | 2.4 | 0.2942 | 1.3 | 0.84 |
| 21c | 45137  | 80  | 74  | 0.40 | 15327 | 0.7064 | 1.9 | 28.68 | 2.4 | 0.2944 | 1.3 | 0.82 |
| 22c | 129240 | 604 | 391 | 0.94 | 983   | 0.3959 | 2.9 | 10.93 | 5.1 | 0.2002 | 4.2 | 0.56 |
| 22r | 78746  | 132 | 119 | 0.29 | 5615  | 0.7106 | 3.3 | 28.96 | 4.2 | 0.2956 | 2.5 | 0.80 |
| 23c | 54574  | 95  | 90  | 0.45 | 18768 | 0.7014 | 1.6 | 28.20 | 2.5 | 0.2916 | 1.9 | 0.64 |

**sample MB30**

|     |        |     |     |      |       |        |     |       |     |        |     |      |
|-----|--------|-----|-----|------|-------|--------|-----|-------|-----|--------|-----|------|
| 1c  | 47406  | 50  | 45  | 0.49 | 15967 | 0.6697 | 2.4 | 27.40 | 2.8 | 0.2968 | 1.4 | 0.87 |
| 1c  | 20507  | 30  | 25  | 0.20 | 7009  | 0.7025 | 1.9 | 28.32 | 2.5 | 0.2923 | 1.6 | 0.77 |
| 1c  | 75586  | 116 | 102 | 0.40 | 4408  | 0.6791 | 1.8 | 27.54 | 2.5 | 0.2941 | 1.8 | 0.71 |
| 2c  | 56307  | 165 | 76  | 0.31 | 2432  | 0.3703 | 4.4 | 13.53 | 4.6 | 0.2650 | 1.3 | 0.96 |
| 3c  | 68892  | 97  | 85  | 0.30 | 23614 | 0.7048 | 1.7 | 28.43 | 2.1 | 0.2925 | 1.3 | 0.80 |
| 4c  | 85155  | 119 | 109 | 0.40 | 10416 | 0.7048 | 2.0 | 28.61 | 2.4 | 0.2944 | 1.3 | 0.83 |
| 5c  | 69761  | 94  | 84  | 0.36 | 23845 | 0.7045 | 2.0 | 28.41 | 2.3 | 0.2925 | 1.1 | 0.89 |
| 6c  | 52362  | 190 | 123 | 0.38 | 2495  | 0.5359 | 2.1 | 18.98 | 2.9 | 0.2568 | 2.1 | 0.72 |
| 7c  | 122573 | 165 | 160 | 0.56 | 41290 | 0.7069 | 2.8 | 28.95 | 3.0 | 0.2970 | 1.1 | 0.94 |
| 7c  | 29706  | 41  | 38  | 0.36 | 2999  | 0.7074 | 2.1 | 29.14 | 2.4 | 0.2988 | 1.3 | 0.86 |
| 8c  | 82477  | 126 | 114 | 0.38 | 8316  | 0.7057 | 1.8 | 28.60 | 2.4 | 0.2939 | 1.5 | 0.76 |
| 8r  | 45548  | 396 | 91  | 0.10 | 3076  | 0.2118 | 1.6 | 5.737 | 2.4 | 0.1964 | 1.7 | 0.70 |
| 9c  | 38336  | 58  | 56  | 0.59 | 5008  | 0.7087 | 1.6 | 29.15 | 2.4 | 0.2983 | 1.8 | 0.67 |
| 10c | 79172  | 119 | 104 | 0.30 | 11844 | 0.6974 | 2.2 | 27.79 | 2.7 | 0.2890 | 1.5 | 0.82 |
| 11c | 34148  | 47  | 43  | 0.42 | 11664 | 0.7011 | 2.7 | 28.32 | 3.1 | 0.2930 | 1.6 | 0.87 |
| 12c | 50766  | 68  | 64  | 0.46 | 16882 | 0.7144 | 2.9 | 29.67 | 3.3 | 0.3012 | 1.6 | 0.88 |
| 13c | 72955  | 85  | 82  | 0.63 | 15732 | 0.7056 | 2.0 | 28.70 | 2.6 | 0.2950 | 1.6 | 0.78 |
| 14c | 17788  | 28  | 26  | 0.45 | 1374  | 0.7092 | 1.9 | 29.08 | 2.6 | 0.2974 | 1.8 | 0.73 |
| 15c | 61730  | 100 | 90  | 0.38 | 20966 | 0.7047 | 2.1 | 28.63 | 2.7 | 0.2947 | 1.6 | 0.79 |
| 16c | 50166  | 77  | 69  | 0.41 | 10560 | 0.6995 | 2.1 | 28.07 | 2.8 | 0.2910 | 1.8 | 0.76 |
| 17c | 28473  | 47  | 41  | 0.28 | 1250  | 0.7100 | 3.0 | 29.14 | 3.4 | 0.2977 | 1.5 | 0.89 |
| 18r | 17473  | 30  | 26  | 0.27 | 5931  | 0.7061 | 2.1 | 28.73 | 3.0 | 0.2951 | 2.1 | 0.71 |
| 19c | 26545  | 37  | 34  | 0.48 | 3713  | 0.6994 | 2.8 | 28.05 | 3.5 | 0.2908 | 2.2 | 0.79 |
| 20c | 50848  | 152 | 93  | 0.78 | 3653  | 0.4381 | 2.0 | 16.08 | 2.3 | 0.2662 | 1.1 | 0.89 |

|                    |        |     |     |      |       |        |     |       |     |        |     |      |
|--------------------|--------|-----|-----|------|-------|--------|-----|-------|-----|--------|-----|------|
| 20c                | 64466  | 100 | 102 | 0.76 | 22143 | 0.6975 | 1.8 | 28.11 | 2.2 | 0.2923 | 1.3 | 0.80 |
| <b>sample SW25</b> |        |     |     |      |       |        |     |       |     |        |     |      |
| 1c                 | 43966  | 109 | 90  | 0.30 | 5189  | 0.6729 | 2.5 | 25.11 | 2.9 | 0.2706 | 1.5 | 0.86 |
| 1r                 | 62650  | 138 | 111 | 0.23 | 23132 | 0.6717 | 1.8 | 25.05 | 2.2 | 0.2705 | 1.2 | 0.84 |
| 2c                 | 35216  | 66  | 55  | 0.35 | 12872 | 0.6740 | 2.1 | 25.43 | 2.6 | 0.2737 | 1.5 | 0.80 |
| 3c                 | 49362  | 83  | 73  | 0.46 | 18077 | 0.6713 | 2.5 | 25.28 | 2.9 | 0.2731 | 1.5 | 0.85 |
| 4c                 | 50612  | 88  | 78  | 0.54 | 16339 | 0.6745 | 2.1 | 25.31 | 2.5 | 0.2721 | 1.4 | 0.83 |
| 5c                 | 102271 | 148 | 115 | 0.11 | 37678 | 0.6762 | 2.4 | 25.30 | 2.6 | 0.2714 | 1.0 | 0.92 |
| 6c                 | 66338  | 95  | 82  | 0.38 | 24104 | 0.6829 | 2.0 | 25.54 | 2.2 | 0.2712 | 0.9 | 0.91 |
| 7c                 | 114188 | 186 | 155 | 0.38 | 43042 | 0.6517 | 2.8 | 23.83 | 3.0 | 0.2652 | 1.2 | 0.91 |
| 7c                 | 139497 | 231 | 175 | 0.60 | 616   | 0.5257 | 3.8 | 19.10 | 4.0 | 0.2635 | 1.3 | 0.94 |
| 8c                 | 96554  | 141 | 122 | 0.40 | 35767 | 0.6765 | 2.0 | 25.19 | 2.5 | 0.2700 | 1.6 | 0.79 |
| 9c                 | 72232  | 92  | 86  | 0.63 | 10554 | 0.6816 | 2.4 | 25.77 | 2.7 | 0.2742 | 1.2 | 0.90 |
| 9c                 | 80735  | 122 | 104 | 0.38 | 11719 | 0.6731 | 3.4 | 25.33 | 3.8 | 0.2729 | 1.7 | 0.89 |
| 10c                | 42332  | 64  | 54  | 0.31 | 15526 | 0.6777 | 2.1 | 25.47 | 2.4 | 0.2726 | 1.2 | 0.87 |
| 11c                | 56557  | 86  | 77  | 0.53 | 5545  | 0.6749 | 2.7 | 25.31 | 2.9 | 0.2720 | 1.1 | 0.92 |
| 11r                | 65303  | 90  | 84  | 0.65 | 23794 | 0.6761 | 2.1 | 25.57 | 2.3 | 0.2743 | 0.8 | 0.94 |
| 12c                | 47350  | 72  | 58  | 0.25 | 6029  | 0.6759 | 2.2 | 25.34 | 2.6 | 0.2719 | 1.5 | 0.83 |
| 13c                | 49358  | 73  | 62  | 0.35 | 3540  | 0.6747 | 1.8 | 25.36 | 2.1 | 0.2726 | 1.1 | 0.85 |
| 14c                | 87371  | 161 | 125 | 0.66 | 2374  | 0.5710 | 1.8 | 20.89 | 2.0 | 0.2653 | 0.9 | 0.91 |
| 15c                | 33545  | 49  | 41  | 0.37 | 3525  | 0.6721 | 2.7 | 25.20 | 3.0 | 0.2719 | 1.3 | 0.91 |
| 16c                | 53467  | 83  | 66  | 0.19 | 7011  | 0.6725 | 2.3 | 25.28 | 2.7 | 0.2726 | 1.4 | 0.85 |
| 17c                | 33320  | 45  | 38  | 0.32 | 2439  | 0.6777 | 2.9 | 25.65 | 3.1 | 0.2746 | 1.2 | 0.92 |
| 18c                | 59780  | 92  | 75  | 0.22 | 21925 | 0.6844 | 1.8 | 25.70 | 2.2 | 0.2723 | 1.3 | 0.81 |
| 19c                | 85176  | 143 | 128 | 0.44 | 31260 | 0.6920 | 1.7 | 25.99 | 2.0 | 0.2723 | 0.9 | 0.88 |
| 20c                | 23710  | 39  | 32  | 0.24 | 7491  | 0.6680 | 2.6 | 25.07 | 3.3 | 0.2722 | 2.0 | 0.79 |
| 21c                | 34019  | 53  | 47  | 0.42 | 12568 | 0.6928 | 1.8 | 25.86 | 2.3 | 0.2707 | 1.4 | 0.79 |
| 22c                | 45667  | 73  | 61  | 0.28 | 16718 | 0.6800 | 1.9 | 25.62 | 2.2 | 0.2732 | 1.2 | 0.84 |
| 23c                | 41866  | 67  | 56  | 0.33 | 15351 | 0.6751 | 2.6 | 25.39 | 2.9 | 0.2727 | 1.2 | 0.91 |
| <b>sample MB31</b> |        |     |     |      |       |        |     |       |     |        |     |      |
| 1c                 | 15842  | 32  | 23  | 0.03 | 1204  | 0.6433 | 3.9 | 22.89 | 4.9 | 0.2581 | 3.0 | 0.79 |
| 2c                 | 74584  | 153 | 131 | 0.47 | 998   | 0.6543 | 2.1 | 23.37 | 2.5 | 0.2591 | 1.4 | 0.84 |
| 2c                 | 96689  | 144 | 131 | 0.14 | 176   | 0.6485 | 3.6 | 22.81 | 4.1 | 0.2552 | 1.9 | 0.89 |
| 3c                 | 116089 | 261 | 193 | 0.09 | 11910 | 0.6514 | 2.5 | 23.22 | 2.8 | 0.2585 | 1.1 | 0.92 |
| 3r                 | 114656 | 268 | 205 | 0.17 | 44286 | 0.6517 | 1.7 | 23.26 | 2.0 | 0.2589 | 1.1 | 0.85 |
| 4c                 | 40232  | 85  | 68  | 0.25 | 5181  | 0.6580 | 1.9 | 23.71 | 2.2 | 0.2613 | 1.3 | 0.83 |
| 5c                 | 112724 | 211 | 163 | 0.16 | 3133  | 0.6574 | 2.0 | 23.70 | 2.4 | 0.2614 | 1.2 | 0.85 |
| 6c-old             | 109099 | 239 | 186 | 0.28 | 7781  | 0.6244 | 2.2 | 23.66 | 2.5 | 0.2748 | 1.1 | 0.90 |
| 7c                 | 82986  | 196 | 137 | 0.11 | 7814  | 0.6134 | 2.0 | 20.91 | 2.4 | 0.2472 | 1.3 | 0.83 |
| 8c                 | 108552 | 816 | 321 | 0.06 | 6472  | 0.3870 | 5.3 | 7.936 | 5.6 | 0.1487 | 1.8 | 0.95 |
| 8r                 | 43624  | 119 | 71  | 0.10 | 4119  | 0.5188 | 2.9 | 17.91 | 3.4 | 0.2504 | 1.7 | 0.87 |
| 9c                 | 85239  | 190 | 139 | 0.06 | 4170  | 0.6515 | 2.6 | 23.24 | 2.9 | 0.2587 | 1.2 | 0.91 |
| 10c                | 111589 | 226 | 168 | 0.09 | 42906 | 0.6552 | 2.0 | 23.45 | 2.2 | 0.2596 | 0.8 | 0.93 |
| 12c                | 19687  | 51  | 38  | 0.17 | 2810  | 0.6253 | 1.8 | 22.06 | 2.4 | 0.2558 | 1.5 | 0.76 |
| 13c                | 22375  | 56  | 42  | 0.16 | 2764  | 0.6481 | 2.2 | 22.96 | 2.7 | 0.2569 | 1.6 | 0.81 |
| 14c                | 15666  | 36  | 29  | 0.26 | 6051  | 0.6526 | 2.1 | 23.29 | 2.8 | 0.2588 | 1.9 | 0.73 |
| 15c                | 37097  | 78  | 61  | 0.08 | 13890 | 0.6945 | 1.9 | 25.53 | 2.5 | 0.2666 | 1.6 | 0.76 |
| 16c-old            | 45867  | 90  | 69  | 0.04 | 3987  | 0.6827 | 2.1 | 26.36 | 2.3 | 0.2800 | 0.8 | 0.94 |
| 17c                | 42926  | 103 | 89  | 0.48 | 2886  | 0.6507 | 3.1 | 23.18 | 3.4 | 0.2583 | 1.4 | 0.91 |
| 18c                | 83925  | 184 | 135 | 0.06 | 7943  | 0.6532 | 2.3 | 23.25 | 2.6 | 0.2581 | 1.2 | 0.88 |
| 19c                | 200083 | 527 | 382 | 0.05 | 13913 | 0.6509 | 2.1 | 23.16 | 2.4 | 0.2581 | 1.3 | 0.85 |
| 20c                | 76397  | 164 | 120 | 0.05 | 29582 | 0.6530 | 2.8 | 23.23 | 3.1 | 0.2580 | 1.4 | 0.89 |
| 21c                | 84842  | 184 | 147 | 0.29 | 33098 | 0.6476 | 2.2 | 22.88 | 2.5 | 0.2562 | 1.2 | 0.87 |

|     |        |     |     |      |       |        |     |       |     |        |     |      |
|-----|--------|-----|-----|------|-------|--------|-----|-------|-----|--------|-----|------|
| 22c | 37108  | 85  | 66  | 0.23 | 14321 | 0.6510 | 2.1 | 23.24 | 2.4 | 0.2589 | 1.2 | 0.86 |
| 23c | 29917  | 65  | 53  | 0.26 | 4366  | 0.6630 | 2.2 | 24.25 | 2.7 | 0.2652 | 1.6 | 0.81 |
| 24c | 57223  | 163 | 103 | 0.31 | 1919  | 0.5197 | 2.2 | 18.07 | 2.6 | 0.2522 | 1.3 | 0.86 |
| 23c | 94967  | 208 | 158 | 0.15 | 12920 | 0.6491 | 2.2 | 22.96 | 2.6 | 0.2566 | 1.3 | 0.86 |
| 25c | 103071 | 236 | 171 | 0.05 | 4198  | 0.6496 | 2.1 | 23.06 | 2.6 | 0.2575 | 1.5 | 0.82 |
| 26c | 24959  | 64  | 51  | 0.28 | 6913  | 0.6491 | 2.2 | 22.90 | 2.7 | 0.2558 | 1.6 | 0.81 |

**sample SW29**

|     |        |     |     |      |       |        |     |       |     |        |     |      |
|-----|--------|-----|-----|------|-------|--------|-----|-------|-----|--------|-----|------|
| 1c  | 184506 | 483 | 386 | 0.51 | 1686  | 0.6023 | 3.5 | 20.32 | 4.1 | 0.2447 | 2.3 | 0.84 |
| 2c  | 160082 | 501 | 409 | 0.64 | 14663 | 0.6217 | 2.1 | 20.51 | 2.6 | 0.2392 | 1.5 | 0.81 |
| 3c  | 187738 | 392 | 331 | 0.39 | 1943  | 0.6495 | 2.8 | 23.15 | 3.2 | 0.2585 | 1.6 | 0.86 |
| 4c  | 32129  | 71  | 55  | 0.29 | 1462  | 0.6461 | 2.6 | 22.79 | 3.1 | 0.2558 | 1.7 | 0.85 |
| 5c  | 127797 | 268 | 221 | 0.37 | 13033 | 0.6477 | 2.8 | 22.84 | 3.3 | 0.2557 | 1.8 | 0.83 |
| 6c  | 28578  | 60  | 48  | 0.28 | 5046  | 0.6489 | 2.6 | 22.88 | 3.4 | 0.2557 | 2.3 | 0.75 |
| 6c  | 55567  | 84  | 84  | 0.55 | 206   | 0.6447 | 3.1 | 22.72 | 4.2 | 0.2556 | 2.8 | 0.74 |
| 7c  | 52655  | 114 | 94  | 0.43 | 13432 | 0.6450 | 2.7 | 22.59 | 2.9 | 0.2541 | 1.1 | 0.92 |
| 8c  | 150707 | 460 | 258 | 0.51 | 411   | 0.3882 | 3.5 | 12.64 | 3.9 | 0.2361 | 1.7 | 0.90 |
| 9c  | 55701  | 112 | 88  | 0.29 | 13544 | 0.6358 | 2.7 | 21.81 | 3.6 | 0.2488 | 2.3 | 0.76 |
| 9r  | 79929  | 169 | 133 | 0.28 | 6467  | 0.6431 | 2.5 | 22.48 | 3.6 | 0.2536 | 2.5 | 0.70 |
| 10c | 81017  | 187 | 140 | 0.39 | 7068  | 0.5831 | 2.2 | 20.25 | 3.3 | 0.2519 | 2.5 | 0.66 |
| 12c | 102910 | 527 | 285 | 0.70 | 931   | 0.4197 | 1.8 | 12.99 | 2.8 | 0.2245 | 2.1 | 0.64 |
| 13c | 128204 | 266 | 226 | 0.40 | 1455  | 0.6521 | 3.4 | 23.29 | 3.7 | 0.2590 | 1.4 | 0.92 |
| 14c | 131842 | 282 | 234 | 0.42 | 20726 | 0.6506 | 1.6 | 22.73 | 1.9 | 0.2534 | 1.0 | 0.85 |
| 15c | 19530  | 41  | 35  | 0.53 | 3398  | 0.6437 | 1.6 | 22.56 | 2.3 | 0.2542 | 1.6 | 0.70 |
| 16c | 125872 | 327 | 231 | 0.48 | 13101 | 0.5447 | 1.7 | 18.56 | 2.2 | 0.2472 | 1.4 | 0.77 |
| 17c | 72845  | 771 | 172 | 0.18 | 1301  | 0.2009 | 2.4 | 4.805 | 2.7 | 0.1734 | 1.3 | 0.87 |
| 18c | 134032 | 435 | 228 | 0.69 | 3079  | 0.3526 | 2.9 | 11.49 | 3.2 | 0.2363 | 1.2 | 0.93 |
| 19c | 151546 | 323 | 273 | 0.48 | 9769  | 0.6497 | 2.5 | 23.08 | 3.1 | 0.2576 | 1.8 | 0.81 |
| 20c | 173141 | 451 | 292 | 0.42 | 12586 | 0.4952 | 2.7 | 17.22 | 3.0 | 0.2522 | 1.3 | 0.89 |
| 21c | 115555 | 217 | 180 | 0.39 | 5655  | 0.6510 | 1.9 | 22.96 | 2.2 | 0.2558 | 1.1 | 0.86 |
| 21r | 200822 | 680 | 129 | 0.47 | 1936  | 0.0874 | 20  | 2.92  | 21  | 0.2420 | 2.0 | 1.00 |
| 22c | 103286 | 197 | 159 | 0.31 | 21164 | 0.6480 | 2.2 | 22.74 | 3.1 | 0.2545 | 2.2 | 0.70 |
| 22c | 79468  | 154 | 123 | 0.28 | 6814  | 0.6490 | 2.5 | 22.76 | 3.1 | 0.2543 | 1.8 | 0.82 |
| 23r | 46395  | 88  | 72  | 0.29 | 863   | 0.6481 | 3.2 | 22.70 | 4.0 | 0.2541 | 2.3 | 0.82 |
| 23c | 75499  | 148 | 121 | 0.36 | 4490  | 0.6449 | 1.9 | 22.65 | 2.8 | 0.2547 | 2.1 | 0.67 |
| 24c | 105568 | 203 | 168 | 0.44 | 33458 | 0.6391 | 3.0 | 22.41 | 3.3 | 0.2543 | 1.4 | 0.91 |
| 25c | 112327 | 233 | 181 | 0.99 | 598   | 0.5945 | 2.0 | 20.19 | 2.3 | 0.2462 | 1.1 | 0.88 |

**sample Sin23**

|     |        |      |     |      |       |        |     |       |     |        |     |      |
|-----|--------|------|-----|------|-------|--------|-----|-------|-----|--------|-----|------|
| 2c  | 64456  | 805  | 162 | 0.63 | 223   | 0.1383 | 3.9 | 2.809 | 4.3 | 0.1473 | 1.8 | 0.91 |
| 3c  | 9064   | 692  | 61  | 0.15 | 1295  | 0.0831 | 3.7 | 1.287 | 4.4 | 0.1123 | 2.4 | 0.84 |
| 4c  | 37209  | 785  | 168 | 0.29 | 3662  | 0.1869 | 2.3 | 4.755 | 2.7 | 0.1845 | 1.4 | 0.84 |
| 5c  | 42259  | 626  | 170 | 0.33 | 486   | 0.2159 | 2.4 | 5.473 | 2.9 | 0.1838 | 1.6 | 0.82 |
| 6r  | 45374  | 481  | 209 | 0.51 | 5591  | 0.3348 | 2.5 | 9.251 | 3.2 | 0.2004 | 2.0 | 0.79 |
| 6r  | 54343  | 392  | 219 | 0.32 | 23670 | 0.4617 | 2.7 | 14.54 | 3.2 | 0.2284 | 1.7 | 0.84 |
| 7c  | 87531  | 488  | 347 | 0.38 | 2073  | 0.6061 | 3.3 | 19.22 | 3.7 | 0.2300 | 1.5 | 0.91 |
| 8c  | 53066  | 556  | 212 | 0.33 | 227   | 0.2824 | 3.5 | 7.818 | 4.3 | 0.2008 | 2.5 | 0.82 |
| 9c  | 38356  | 806  | 165 | 0.22 | 2521  | 0.1798 | 2.1 | 4.487 | 2.8 | 0.1810 | 1.9 | 0.74 |
| 9c  | 143019 | 1113 | 565 | 0.34 | 718   | 0.4222 | 2.4 | 11.67 | 2.7 | 0.2005 | 1.3 | 0.88 |
| 9c  | 44559  | 625  | 198 | 0.16 | 1429  | 0.2801 | 2.1 | 7.601 | 2.6 | 0.1968 | 1.5 | 0.81 |
| 10c | 27323  | 126  | 98  | 0.46 | 11654 | 0.6114 | 2.9 | 19.70 | 3.8 | 0.2337 | 2.5 | 0.77 |
| 10c | 28541  | 133  | 104 | 0.46 | 4136  | 0.6077 | 2.9 | 19.38 | 3.2 | 0.2313 | 1.3 | 0.91 |
| 10c | 40647  | 180  | 154 | 0.72 | 2952  | 0.6083 | 2.1 | 19.38 | 3.1 | 0.2311 | 2.2 | 0.70 |
| 10c | 43097  | 199  | 169 | 0.68 | 18275 | 0.6141 | 2.2 | 19.87 | 2.6 | 0.2346 | 1.4 | 0.84 |
| 11c | 28274  | 1184 | 150 | 0.22 | 248   | 0.1009 | 2.2 | 1.610 | 4.1 | 0.1158 | 3.5 | 0.53 |



|      |       |      |     |      |       |        |      |        |      |        |     |      |
|------|-------|------|-----|------|-------|--------|------|--------|------|--------|-----|------|
| 11c  | 81428 | 1118 | 303 | 0.31 | 99    | 0.1737 | 2.4  | 4.282  | 4.0  | 0.1788 | 3.1 | 0.61 |
| 11c  | 39807 | 955  | 160 | 0.19 | 167   | 0.1260 | 3.5  | 2.395  | 5.6  | 0.1379 | 4.4 | 0.63 |
| 12cc | 74624 | 636  | 213 | 0.12 | 1239  | 0.2803 | 3.3  | 8.936  | 3.7  | 0.2312 | 1.6 | 0.90 |
| 12c  | 66040 | 453  | 155 | 0.23 | 29308 | 0.2800 | 3.3  | 8.612  | 3.7  | 0.2231 | 1.8 | 0.88 |
| 12c  | 60984 | 385  | 187 | 0.21 | 3822  | 0.4125 | 2.2  | 13.06  | 2.5  | 0.2297 | 1.2 | 0.88 |
| 10r  | 2541  | 2223 | 34  | 0.05 | 2871  | 0.0157 | 3.7  | 0.1894 | 5.3  | 0.0877 | 3.8 | 0.69 |
| 10r  | 12056 | 2081 | 68  | 0.07 | 285   | 0.0252 | 14.4 | 0.4759 | 16.7 | 0.1371 | 8.4 | 0.86 |

**sample MB32**

|     |        |     |     |      |       |        |     |       |     |        |     |      |
|-----|--------|-----|-----|------|-------|--------|-----|-------|-----|--------|-----|------|
| 1c  | 152819 | 715 | 357 | 0.20 | 14285 | 0.4479 | 1.8 | 11.20 | 2.0 | 0.1813 | 1.0 | 0.88 |
| 2c  | 27406  | 94  | 62  | 0.48 | 5056  | 0.5265 | 2.4 | 13.65 | 3.0 | 0.1880 | 1.9 | 0.78 |
| 2c  | 14915  | 53  | 35  | 0.56 | 7503  | 0.5237 | 2.4 | 13.54 | 3.2 | 0.1876 | 2.2 | 0.74 |
| 1c  | 149143 | 609 | 270 | 0.21 | 12355 | 0.3947 | 1.6 | 9.829 | 1.9 | 0.1806 | 1.0 | 0.86 |
| 3c  | 108352 | 327 | 185 | 0.33 | 3243  | 0.4550 | 2.6 | 11.49 | 2.9 | 0.1831 | 1.3 | 0.89 |
| 4c  | 228802 | 569 | 262 | 0.30 | 150   | 0.3025 | 2.4 | 6.904 | 3.2 | 0.1655 | 2.1 | 0.76 |
| 5c  | 38107  | 132 | 75  | 0.30 | 1346  | 0.4555 | 2.2 | 11.95 | 2.8 | 0.1902 | 1.8 | 0.76 |
| 6c  | 38400  | 142 | 67  | 0.31 | 1708  | 0.3650 | 1.8 | 9.645 | 2.0 | 0.1917 | 1.0 | 0.87 |
| 7c  | 67613  | 482 | 147 | 0.27 | 1990  | 0.2657 | 1.8 | 6.047 | 2.2 | 0.1651 | 1.2 | 0.82 |
| 7r  | 55424  | 820 | 64  | 0.14 | 982   | 0.0585 | 6.0 | 1.075 | 6.9 | 0.1333 | 3.3 | 0.87 |
| 8c  | 34082  | 120 | 59  | 0.61 | 1766  | 0.3505 | 2.7 | 9.032 | 3.1 | 0.1869 | 1.5 | 0.88 |
| 9c  | 64461  | 226 | 124 | 0.27 | 5352  | 0.4733 | 1.8 | 12.21 | 2.2 | 0.1871 | 1.3 | 0.81 |
| 10c | 51960  | 296 | 98  | 0.33 | 1937  | 0.2557 | 3.7 | 6.695 | 3.9 | 0.1899 | 1.1 | 0.96 |
| 11c | 52553  | 460 | 84  | 0.14 | 3463  | 0.1500 | 6.3 | 3.806 | 6.3 | 0.1840 | 0.9 | 0.99 |
| 11c | 33612  | 106 | 68  | 0.40 | 5789  | 0.5281 | 1.7 | 13.71 | 2.1 | 0.1882 | 1.3 | 0.80 |
| 12c | 27856  | 87  | 56  | 0.45 | 3646  | 0.5254 | 2.3 | 13.52 | 2.8 | 0.1866 | 1.6 | 0.82 |
| 13c | 54893  | 193 | 106 | 0.39 | 7889  | 0.4385 | 2.2 | 11.43 | 2.4 | 0.1890 | 1.0 | 0.91 |
| 14c | 48977  | 163 | 105 | 0.38 | 6486  | 0.5345 | 1.5 | 13.91 | 1.9 | 0.1887 | 1.1 | 0.81 |
| 14c | 40296  | 127 | 89  | 0.43 | 1796  | 0.5249 | 1.9 | 13.58 | 2.6 | 0.1877 | 1.7 | 0.75 |
| 15c | 35509  | 122 | 71  | 0.33 | 18545 | 0.4915 | 1.7 | 13.00 | 2.0 | 0.1918 | 1.0 | 0.86 |
| 15c | 50365  | 191 | 108 | 0.31 | 5053  | 0.4763 | 1.8 | 12.37 | 2.0 | 0.1884 | 0.9 | 0.88 |
| 16c | 69119  | 408 | 141 | 0.51 | 36708 | 0.2290 | 4.5 | 5.952 | 4.6 | 0.1885 | 1.0 | 0.97 |
| 16r | 65695  | 537 | 134 | 0.22 | 9664  | 0.2135 | 3.5 | 5.267 | 3.6 | 0.1789 | 0.9 | 0.97 |
| 17c | 21679  | 85  | 59  | 0.87 | 2909  | 0.4764 | 1.7 | 12.47 | 2.1 | 0.1899 | 1.2 | 0.83 |
| 18c | 17101  | 65  | 46  | 0.72 | 1163  | 0.5278 | 2.2 | 13.81 | 2.8 | 0.1897 | 1.7 | 0.78 |
| 19c | 39472  | 171 | 89  | 0.36 | 9140  | 0.4250 | 2.0 | 10.95 | 2.2 | 0.1869 | 0.9 | 0.91 |
| 20r | 97611  | 406 | 207 | 0.24 | 1419  | 0.4296 | 2.2 | 10.87 | 2.4 | 0.1835 | 1.1 | 0.88 |
| 21c | 55653  | 209 | 167 | 1.11 | 30055 | 0.5189 | 1.8 | 13.28 | 2.1 | 0.1856 | 1.0 | 0.87 |
| 22c | 40086  | 185 | 100 | 0.24 | 6935  | 0.4689 | 2.1 | 12.04 | 2.4 | 0.1862 | 1.2 | 0.88 |
| 22c | 37173  | 190 | 98  | 0.54 | 2826  | 0.3753 | 1.9 | 9.607 | 2.4 | 0.1857 | 1.5 | 0.79 |
| 22c | 57122  | 248 | 152 | 0.28 | 9573  | 0.5292 | 1.7 | 13.72 | 2.1 | 0.1880 | 1.1 | 0.84 |
| 23c | 32584  | 141 | 93  | 0.46 | 4923  | 0.5295 | 1.7 | 13.77 | 2.1 | 0.1886 | 1.3 | 0.78 |
| 24c | 23254  | 102 | 71  | 0.63 | 1572  | 0.5231 | 2.0 | 13.60 | 2.6 | 0.1886 | 1.8 | 0.75 |
| 25c | 51287  | 235 | 154 | 0.58 | 18313 | 0.5212 | 2.1 | 13.42 | 2.5 | 0.1867 | 1.3 | 0.86 |
| 25r | 44562  | 289 | 153 | 0.37 | 6295  | 0.4497 | 2.1 | 11.46 | 2.4 | 0.1849 | 1.2 | 0.88 |
| 26c | 44884  | 226 | 144 | 0.42 | 24150 | 0.5208 | 2.0 | 13.36 | 2.3 | 0.1861 | 1.1 | 0.88 |
| 27c | 28786  | 141 | 95  | 0.50 | 1712  | 0.5273 | 2.1 | 13.71 | 3.2 | 0.1886 | 2.4 | 0.66 |
| 27c | 63150  | 321 | 213 | 0.69 | 33445 | 0.4896 | 1.8 | 12.78 | 2.2 | 0.1893 | 1.2 | 0.83 |

**sample SIC19**

|    |       |     |    |      |      |        |      |       |      |        |     |      |
|----|-------|-----|----|------|------|--------|------|-------|------|--------|-----|------|
| 1c | 6626  | 53  | 18 | 0.52 | 802  | 0.2333 | 3.5  | 5.682 | 4.9  | 0.1767 | 3.5 | 0.71 |
| 2c | 11915 | 263 | 49 | 0.30 | 844  | 0.1691 | 12.7 | 2.849 | 13.6 | 0.1222 | 4.9 | 0.93 |
| 3c | 15793 | 37  | 31 | 0.62 | 1133 | 0.5280 | 2.9  | 13.78 | 4.0  | 0.1893 | 2.8 | 0.72 |
| 3r | 7626  | 31  | 20 | 0.38 | 4085 | 0.5244 | 2.1  | 13.57 | 3.2  | 0.1877 | 2.4 | 0.66 |
| 3r | 15831 | 45  | 28 | 0.68 | 3372 | 0.3673 | 4.7  | 9.464 | 5.2  | 0.1869 | 2.4 | 0.89 |
| 4c | 17078 | 70  | 48 | 0.48 | 7770 | 0.5582 | 2.1  | 14.43 | 2.6  | 0.1875 | 1.5 | 0.81 |

|     |       |     |    |      |       |        |      |       |      |        |     |      |
|-----|-------|-----|----|------|-------|--------|------|-------|------|--------|-----|------|
| 5c  | 5024  | 15  | 11 | 0.81 | 1803  | 0.5259 | 2.6  | 13.68 | 3.9  | 0.1887 | 2.9 | 0.68 |
| 6c  | 12786 | 56  | 39 | 0.62 | 6748  | 0.5281 | 2.4  | 13.81 | 3.1  | 0.1897 | 2.0 | 0.77 |
| 7c  | 41125 | 120 | 87 | 0.63 | 756   | 0.5287 | 3.6  | 13.69 | 4.6  | 0.1878 | 2.9 | 0.78 |
| 8c  | 21316 | 133 | 27 | 0.51 | 13510 | 0.1422 | 6.8  | 3.091 | 7.0  | 0.1576 | 1.7 | 0.97 |
| 9c  | 14914 | 703 | 71 | 0.56 | 699   | 0.0721 | 7.5  | 1.045 | 9.4  | 0.1050 | 5.7 | 0.79 |
| 10c | 12639 | 239 | 40 | 0.37 | 4797  | 0.1427 | 3.5  | 2.336 | 5.2  | 0.1187 | 3.8 | 0.67 |
| 11c | 14151 | 211 | 67 | 0.33 | 4314  | 0.2911 | 1.9  | 5.674 | 3.6  | 0.1414 | 3.1 | 0.52 |
| 12c | 25690 | 99  | 65 | 0.47 | 13820 | 0.5222 | 2.1  | 13.39 | 2.5  | 0.1859 | 1.4 | 0.83 |
| 13c | 25757 | 128 | 33 | 0.51 | 710   | 0.1322 | 10.0 | 3.442 | 10.3 | 0.1889 | 2.2 | 0.98 |
| 14c | 19537 | 68  | 43 | 0.37 | 10374 | 0.5242 | 1.7  | 13.54 | 2.4  | 0.1873 | 1.8 | 0.68 |
| 16c | 1577  | 6   | 4  | 0.89 | 830   | 0.5257 | 2.5  | 13.66 | 5.6  | 0.1885 | 5.1 | 0.44 |
| 17c | 11141 | 33  | 23 | 0.65 | 3313  | 0.5234 | 2.7  | 13.54 | 3.6  | 0.1877 | 2.4 | 0.74 |
| 18c | 26102 | 121 | 80 | 0.55 | 3425  | 0.5184 | 4.6  | 13.37 | 4.9  | 0.1871 | 1.7 | 0.93 |
| 19c | 1979  | 8   | 6  | 0.95 | 1042  | 0.5293 | 3.0  | 13.89 | 4.3  | 0.1904 | 3.2 | 0.68 |
| 20c | 5901  | 22  | 16 | 0.73 | 3129  | 0.5280 | 2.9  | 13.69 | 3.9  | 0.1881 | 2.6 | 0.75 |

**sample NG22**

|     |       |     |     |      |       |        |      |       |      |        |     |      |
|-----|-------|-----|-----|------|-------|--------|------|-------|------|--------|-----|------|
| 2c  | 30939 | 177 | 49  | 0.29 | 3228  | 0.2137 | 5.4  | 5.324 | 5.7  | 0.1807 | 1.7 | 0.96 |
| 3c  | 17444 | 59  | 42  | 0.63 | 3993  | 0.5305 | 2.0  | 13.88 | 2.8  | 0.1898 | 2.0 | 0.69 |
| 4c  | 49921 | 221 | 72  | 0.07 | 4961  | 0.3063 | 2.7  | 7.543 | 3.3  | 0.1786 | 1.8 | 0.83 |
| 5c  | 14499 | 286 | 58  | 0.35 | 1389  | 0.1625 | 4.9  | 2.928 | 5.1  | 0.1306 | 1.5 | 0.96 |
| 7c  | 6849  | 23  | 17  | 0.82 | 1503  | 0.5262 | 2.2  | 13.60 | 3.4  | 0.1874 | 2.7 | 0.63 |
| 8c  | 3809  | 13  | 10  | 1.05 | 2048  | 0.5253 | 2.6  | 13.59 | 5.0  | 0.1877 | 4.3 | 0.53 |
| 8c  | 3185  | 12  | 9   | 0.88 | 1684  | 0.5240 | 3.3  | 13.71 | 5.4  | 0.1898 | 4.3 | 0.62 |
| 9c  | 7886  | 27  | 21  | 0.95 | 4231  | 0.5239 | 4.1  | 13.49 | 5.1  | 0.1868 | 3.1 | 0.80 |
| 10c | 34628 | 123 | 86  | 0.58 | 4859  | 0.5286 | 2.5  | 13.81 | 3.1  | 0.1894 | 1.8 | 0.81 |
| 11c | 32818 | 127 | 82  | 0.34 | 17470 | 0.5248 | 3.4  | 13.63 | 4.2  | 0.1883 | 2.6 | 0.79 |
| 12c | 33813 | 153 | 67  | 0.45 | 577   | 0.2971 | 5.0  | 7.541 | 5.4  | 0.1841 | 1.9 | 0.93 |
| 12c | 29197 | 170 | 107 | 0.36 | 1506  | 0.5245 | 2.7  | 13.48 | 4.1  | 0.1863 | 3.1 | 0.66 |
| 13c | 34326 | 344 | 123 | 0.41 | 1345  | 0.2858 | 3.9  | 6.054 | 4.9  | 0.1536 | 3.0 | 0.79 |
| 14c | 24457 | 85  | 63  | 0.74 | 1515  | 0.5279 | 1.9  | 13.73 | 2.7  | 0.1887 | 1.9 | 0.70 |
| 15c | 24065 | 99  | 65  | 0.41 | 2211  | 0.5307 | 2.3  | 13.92 | 2.9  | 0.1903 | 1.8 | 0.78 |
| 14c | 24884 | 76  | 55  | 0.74 | 2962  | 0.5158 | 3.0  | 13.33 | 3.8  | 0.1875 | 2.3 | 0.79 |
| 16c | 23491 | 231 | 85  | 0.17 | 1671  | 0.3185 | 2.7  | 8.294 | 3.2  | 0.1888 | 1.7 | 0.84 |
| 17c | 80322 | 325 | 176 | 0.01 | 22021 | 0.5214 | 2.4  | 13.30 | 2.8  | 0.1851 | 1.4 | 0.85 |
| 18c | 42509 | 189 | 141 | 0.73 | 1407  | 0.5243 | 2.2  | 13.56 | 3.5  | 0.1875 | 2.7 | 0.65 |
| 19c | 24851 | 129 | 89  | 0.58 | 3819  | 0.5257 | 3.1  | 13.50 | 3.8  | 0.1863 | 2.2 | 0.81 |
| 20c | 41503 | 178 | 117 | 0.41 | 7739  | 0.5263 | 2.4  | 13.65 | 2.7  | 0.1881 | 1.3 | 0.88 |
| 21c | 21079 | 102 | 58  | 0.50 | 4437  | 0.4296 | 2.8  | 10.98 | 3.5  | 0.1853 | 2.1 | 0.80 |
| 22c | 11340 | 44  | 36  | 1.04 | 1052  | 0.5278 | 2.7  | 13.88 | 3.5  | 0.1908 | 2.3 | 0.76 |
| 23c | 16544 | 98  | 41  | 0.20 | 7674  | 0.3635 | 3.0  | 9.045 | 4.1  | 0.1805 | 2.8 | 0.73 |
| 24c | 27846 | 146 | 50  | 0.20 | 5126  | 0.2783 | 2.9  | 7.238 | 3.8  | 0.1886 | 2.5 | 0.76 |
| 24c | 20896 | 126 | 18  | 0.34 | 1346  | 0.0675 | 28.2 | 1.707 | 28.4 | 0.1835 | 2.6 | 1.00 |
| 25c | 9434  | 27  | 22  | 0.95 | 1941  | 0.5314 | 3.9  | 13.98 | 4.4  | 0.1908 | 2.0 | 0.89 |
| 26c | 16440 | 210 | 24  | 0.27 | 8890  | 0.0685 | 15.3 | 1.765 | 15.6 | 0.1868 | 2.9 | 0.98 |

**Plešovice standard (30 and 40µm spot size)**

|        |       |     |    |      |       |         |     |        |     |         |     |      |
|--------|-------|-----|----|------|-------|---------|-----|--------|-----|---------|-----|------|
| Ples-1 | 12486 | 364 | 18 | 0.09 | 26066 | 0.05343 | 1.7 | 0.3931 | 2.1 | 0.05337 | 1.2 | 0.83 |
| Ples-2 | 10571 | 315 | 16 | 0.09 | 9756  | 0.05399 | 1.7 | 0.3972 | 2.1 | 0.05336 | 1.2 | 0.80 |
| Ples-3 | 27778 | 856 | 44 | 0.09 | 11936 | 0.05413 | 1.6 | 0.3953 | 1.8 | 0.05297 | 0.8 | 0.89 |
| Ples-4 | 25820 | 780 | 40 | 0.09 | 54007 | 0.05428 | 1.8 | 0.3963 | 2.0 | 0.05294 | 1.0 | 0.87 |
| Ples-5 | 31936 | 520 | 27 | 0.09 | 22355 | 0.05432 | 1.7 | 0.3964 | 2.1 | 0.05293 | 1.2 | 0.81 |
| Ples-6 | 25951 | 407 | 21 | 0.09 | 61424 | 0.05392 | 1.6 | 0.3970 | 1.8 | 0.05339 | 0.8 | 0.90 |
| Ples-7 | 23612 | 383 | 20 | 0.08 | 57048 | 0.05418 | 1.8 | 0.3986 | 2.1 | 0.05336 | 1.0 | 0.87 |
| Ples-8 | 36764 | 603 | 31 | 0.09 | 89037 | 0.05387 | 1.7 | 0.3937 | 2.0 | 0.05301 | 1.0 | 0.86 |

|         |       |     |    |      |       |         |     |        |     |         |     |      |
|---------|-------|-----|----|------|-------|---------|-----|--------|-----|---------|-----|------|
| Ples-9  | 24034 | 396 | 20 | 0.08 | 57790 | 0.05402 | 1.6 | 0.3952 | 1.9 | 0.05305 | 1.0 | 0.85 |
| Ples-10 | 26953 | 427 | 22 | 0.10 | 8935  | 0.05400 | 1.8 | 0.3982 | 2.0 | 0.05348 | 1.0 | 0.87 |
| Ples-11 | 35783 | 592 | 30 | 0.11 | 84918 | 0.05350 | 1.8 | 0.3925 | 1.9 | 0.05321 | 0.6 | 0.94 |
| Ples-12 | 34494 | 570 | 29 | 0.12 | 31670 | 0.05301 | 1.8 | 0.3871 | 2.0 | 0.05296 | 0.8 | 0.90 |
| Ples-13 | 33541 | 542 | 27 | 0.09 | 21717 | 0.05342 | 1.7 | 0.3914 | 2.0 | 0.05314 | 1.0 | 0.88 |
| Ples-14 | 40715 | 671 | 34 | 0.13 | 19713 | 0.05321 | 1.8 | 0.3893 | 2.1 | 0.05306 | 1.1 | 0.85 |
| Ples-15 | 57118 | 938 | 48 | 0.13 | 54564 | 0.05370 | 1.8 | 0.3932 | 2.0 | 0.05310 | 0.8 | 0.91 |

(a) Within run background-corrected mean  $^{207}\text{Pb}$  signal.

(b) U and Pb content and Th/U ratio were calculated relative to GJ-1 reference.

(c) corrected for background, within-run Pb/U fractionation and common Pb using Stacy and Kramers (1975 normalised to GJ-1 (ID-TIMS value/measured value);  $^{207}\text{Pb}/^{235}\text{U}$  calculated using  $^{207}\text{Pb}/^{206}\text{Pb}/(^{238}\text{U}/^{206}\text{Pb} \times 1/$

(d) Rho is the error correlation of the  $^{206}\text{Pb}/^{238}\text{U}$  and  $^{207}\text{Pb}/^{235}\text{U}$  ratios

(e) degree of concordance =  $(^{238}\text{U}/^{206}\text{Pb} \text{ age} \times 100 / ^{207}\text{Pb}/^{206}\text{Pb} \text{ age})$

c=core; r=overgrowth (in first column)

### Results of GJ1 standard measurements

| No.                    | $^{207}\text{Pb}^a$<br>(cps) | U<br>(ppm) | Pb<br>(ppm) | Th<br>U | $^{206}\text{Pb}^b$<br>$^{204}\text{Pb}$ | $^{206}\text{Pb}^b$<br>$^{238}\text{U}$ | 2se<br>% | $^{207}\text{Pb}^b$<br>$^{206}\text{Pb}$ | 2se<br>% | $^{206}\text{Pb}^c$<br>$^{238}\text{U}$ | $^{207}\text{Pb}^d$<br>$^{235}\text{U}$ |
|------------------------|------------------------------|------------|-------------|---------|------------------------------------------|-----------------------------------------|----------|------------------------------------------|----------|-----------------------------------------|-----------------------------------------|
| <b>27.12.2009-seq1</b> |                              |            |             |         |                                          |                                         |          |                                          |          |                                         |                                         |
| a12                    | 12968                        | 238        | 21.9        | 0.031   | 5869                                     | 0.08680                                 | 0.8      | 0.05925                                  | 0.9      | 0.09887                                 | 0.8095                                  |
| a13                    | 13505                        | 245        | 22.3        | 0.031   | 16615                                    | 0.08585                                 | 0.7      | 0.06006                                  | 1.0      | 0.09781                                 | 0.8118                                  |
| GJ1-6                  | 13378                        | 244        | 22.3        | 0.031   | 13824                                    | 0.08585                                 | 0.8      | 0.05993                                  | 1.1      | 0.09822                                 | 0.8134                                  |
| GJ1-7                  | 13413                        | 245        | 22.4        | 0.032   | 22404                                    | 0.08604                                 | 0.7      | 0.05988                                  | 1.0      | 0.09847                                 | 0.8147                                  |
| GJ1-8                  | 13420                        | 246        | 22.8        | 0.032   | 143029                                   | 0.08640                                 | 0.7      | 0.05989                                  | 1.1      | 0.09929                                 | 0.8217                                  |
| GJ1-9                  | 13710                        | 250        | 22.9        | 0.032   | 5454                                     | 0.08599                                 | 0.9      | 0.06013                                  | 0.9      | 0.09886                                 | 0.8214                                  |
| GJ1-10                 | 13629                        | 248        | 22.5        | 0.032   | 9625                                     | 0.08451                                 | 0.8      | 0.06001                                  | 1.0      | 0.09756                                 | 0.8090                                  |
| GJ1-11                 | 13295                        | 244        | 22.5        | 0.032   | 4756                                     | 0.08604                                 | 0.7      | 0.06018                                  | 0.8      | 0.09936                                 | 0.8263                                  |
| GJ1-12                 | 12884                        | 241        | 22.1        | 0.032   | 81019                                    | 0.08492                                 | 0.8      | 0.06001                                  | 0.9      | 0.09848                                 | 0.8166                                  |
| GJ1-13                 | 12892                        | 240        | 21.9        | 0.032   | 8961                                     | 0.08454                                 | 0.9      | 0.05997                                  | 0.9      | 0.09808                                 | 0.8128                                  |
| <b>27.12.2009-seq2</b> |                              |            |             |         |                                          |                                         |          |                                          |          |                                         |                                         |
| GJ1-1                  | 13307                        | 254        | 23.3        | 0.032   | 7788                                     | 0.08542                                 | 0.8      | 0.06012                                  | 0.9      | 0.09869                                 | 0.8181                                  |
| GJ1-2b                 | 13166                        | 250        | 23.0        | 0.032   | 7278                                     | 0.08563                                 | 0.7      | 0.06073                                  | 1.0      | 0.09893                                 | 0.8283                                  |
| GJ1-3                  | 13125                        | 251        | 23.1        | 0.031   | 9165                                     | 0.08567                                 | 0.6      | 0.06051                                  | 0.8      | 0.09897                                 | 0.8256                                  |
| GJ1-4                  | 12787                        | 247        | 22.8        | 0.032   | 9697                                     | 0.08596                                 | 0.8      | 0.06018                                  | 0.7      | 0.09922                                 | 0.8233                                  |
| GJ1-5                  | 12272                        | 243        | 22.1        | 0.032   | 8343                                     | 0.08488                                 | 0.7      | 0.05990                                  | 1.0      | 0.09797                                 | 0.8092                                  |
| GJ1-6                  | 12037                        | 237        | 21.5        | 0.032   | 6671                                     | 0.08453                                 | 0.9      | 0.06001                                  | 1.0      | 0.09749                                 | 0.8066                                  |
| GJ1-7                  | 11705                        | 229        | 20.8        | 0.032   | 9149                                     | 0.08480                                 | 0.8      | 0.06016                                  | 1.0      | 0.09779                                 | 0.8111                                  |
| GJ1-8                  | 11034                        | 218        | 20.1        | 0.032   | 18345                                    | 0.08564                                 | 1.2      | 0.06017                                  | 1.0      | 0.09867                                 | 0.8187                                  |
| GJ1-9                  | 11612                        | 233        | 21.3        | 0.032   | 9298                                     | 0.08546                                 | 1.0      | 0.05953                                  | 0.8      | 0.09845                                 | 0.8080                                  |
| GJ1-10                 | 12002                        | 244        | 22.1        | 0.032   | 32998                                    | 0.08475                                 | 0.5      | 0.05949                                  | 0.8      | 0.09756                                 | 0.8003                                  |
| GJ1-11                 | 12596                        | 252        | 23.0        | 0.032   | 8490                                     | 0.08531                                 | 0.8      | 0.06044                                  | 1.0      | 0.09820                                 | 0.8183                                  |
| GJ1-12                 | 12678                        | 260        | 24.0        | 0.032   | 21260                                    | 0.08616                                 | 0.9      | 0.05966                                  | 0.9      | 0.09909                                 | 0.8152                                  |
| GJ1-13                 | 12278                        | 254        | 23.5        | 0.032   | 8133                                     | 0.08651                                 | 1.0      | 0.06012                                  | 1.1      | 0.09949                                 | 0.8247                                  |
| <b>27.12.2009-seq3</b> |                              |            |             |         |                                          |                                         |          |                                          |          |                                         |                                         |
| GJ1-1                  | 7686                         | 138        | 12.6        | 0.031   | 2722                                     | 0.09636                                 | 1.5      | 0.06017                                  | 0.8      | 0.09854                                 | 0.8144                                  |
| GJ1-2                  | 14338                        | 274        | 24.7        | 0.030   | 2362                                     | 0.09488                                 | 1.7      | 0.06029                                  | 0.9      | 0.09707                                 | 0.8038                                  |
| GJ1-3                  | 13860                        | 264        | 24.3        | 0.031   | 2548                                     | 0.09659                                 | 1.0      | 0.06038                                  | 0.7      | 0.09887                                 | 0.8200                                  |
| GJ1-4                  | 13004                        | 267        | 24.4        | 0.031   | 2433                                     | 0.09602                                 | 0.8      | 0.06024                                  | 0.9      | 0.09882                                 | 0.8176                                  |
| GJ1-5                  | 13258                        | 269        | 24.5        | 0.031   | 1568                                     | 0.09568                                 | 1.0      | 0.06017                                  | 0.9      | 0.09851                                 | 0.8141                                  |
| GJ1-7                  | 12906                        | 279        | 25.9        | 0.031   | 10945                                    | 0.09609                                 | 1.1      | 0.06004                                  | 0.7      | 0.09947                                 | 0.8202                                  |
| a23                    | 11858                        | 258        | 23.7        | 0.031   | 6612                                     | 0.09490                                 | 1.0      | 0.06013                                  | 0.7      | 0.09829                                 | 0.8117                                  |
| GJ1-8                  | 10568                        | 244        | 22.4        | 0.031   | 1685                                     | 0.09481                                 | 1.2      | 0.05993                                  | 0.8      | 0.09873                                 | 0.8127                                  |
| GJ1-9                  | 10837                        | 249        | 22.9        | 0.031   | 2255                                     | 0.09485                                 | 1.0      | 0.06082                                  | 1.1      | 0.09882                                 | 0.8255                                  |

|                        |       |     |      |       |       |         |     |         |     |         |        |
|------------------------|-------|-----|------|-------|-------|---------|-----|---------|-----|---------|--------|
| GJ1-10                 | 9295  | 228 | 20.9 | 0.031 | 2017  | 0.09450 | 0.7 | 0.05998 | 0.8 | 0.09900 | 0.8155 |
| GJ1-11                 | 9179  | 224 | 20.5 | 0.031 | 3975  | 0.09395 | 1.0 | 0.06017 | 1.0 | 0.09846 | 0.8136 |
| GJ1-12                 | 9162  | 238 | 21.6 | 0.031 | 14973 | 0.09218 | 0.6 | 0.06119 | 0.8 | 0.09715 | 0.8165 |
| GJ1-13                 | 9031  | 238 | 21.7 | 0.031 | 1690  | 0.09367 | 0.9 | 0.06061 | 0.8 | 0.09876 | 0.8222 |
| <b>27.12.2009-seq4</b> |       |     |      |       |       |         |     |         |     |         |        |
| GJ1-1                  | 9967  | 279 | 25.0 | 0.033 | 4758  | 0.09020 | 1.2 | 0.06003 | 0.8 | 0.09778 | 0.8082 |
| GJ1-2                  | 10189 | 284 | 25.6 | 0.033 | 6495  | 0.09097 | 1.3 | 0.06007 | 0.8 | 0.09863 | 0.8159 |
| GJ1-4                  | 9443  | 284 | 25.5 | 0.033 | 8759  | 0.09037 | 1.4 | 0.06003 | 0.8 | 0.09830 | 0.8126 |
| GJ1-5                  | 6601  | 195 | 17.6 | 0.034 | 9354  | 0.09124 | 0.9 | 0.06015 | 0.9 | 0.09927 | 0.8222 |
| GJ1-6                  | 6443  | 202 | 18.3 | 0.034 | 9598  | 0.08993 | 1.3 | 0.06019 | 0.9 | 0.09814 | 0.8134 |
| GJ1-7                  | 6216  | 198 | 18.0 | 0.034 | 28947 | 0.09077 | 1.3 | 0.06010 | 0.8 | 0.09908 | 0.8200 |
| GJ1-8                  | 6126  | 205 | 18.5 | 0.034 | 8556  | 0.08992 | 0.9 | 0.06036 | 0.7 | 0.09845 | 0.8183 |
| GJ1-9                  | 6213  | 214 | 19.3 | 0.034 | 5565  | 0.08991 | 1.0 | 0.06019 | 1.0 | 0.09846 | 0.8160 |
| GJ1-10                 | 6518  | 237 | 21.4 | 0.034 | 9334  | 0.08976 | 1.2 | 0.06014 | 1.0 | 0.09860 | 0.8166 |
| GJ1-11                 | 7075  | 260 | 23.4 | 0.033 | 8941  | 0.08995 | 0.7 | 0.06004 | 0.8 | 0.09883 | 0.8172 |
| GJ1-12                 | 7415  | 288 | 25.4 | 0.034 | 8150  | 0.08830 | 1.5 | 0.05992 | 0.9 | 0.09731 | 0.8029 |
| GJ1-13                 | 7467  | 286 | 25.8 | 0.034 | 8062  | 0.08994 | 1.1 | 0.06067 | 1.1 | 0.09914 | 0.8283 |
| <b>27.12.2009-seq5</b> |       |     |      |       |       |         |     |         |     |         |        |
| GJ1-1                  | 6824  | 185 | 16.8 | 0.034 | 7225  | 0.08596 | 0.9 | 0.06004 | 0.8 | 0.09782 | 0.8094 |
| GJ1-2                  | 9520  | 253 | 23.2 | 0.032 | 5017  | 0.08660 | 0.9 | 0.06000 | 1.0 | 0.09857 | 0.8149 |
| GJ1-3                  | 9549  | 253 | 23.1 | 0.031 | 3432  | 0.08637 | 1.2 | 0.06015 | 0.9 | 0.09832 | 0.8149 |
| GJ1-4                  | 9484  | 269 | 25.1 | 0.031 | 6114  | 0.08769 | 0.9 | 0.06042 | 0.8 | 0.09996 | 0.8322 |
| GJ1-5                  | 9550  | 269 | 24.7 | 0.031 | 3808  | 0.08642 | 1.4 | 0.06078 | 1.2 | 0.09852 | 0.8251 |
| GJ1-6                  | 8930  | 256 | 23.4 | 0.033 | 5690  | 0.08634 | 1.1 | 0.06010 | 1.1 | 0.09857 | 0.8163 |
| GJ1-7                  | 8722  | 245 | 22.5 | 0.033 | 2069  | 0.08653 | 0.9 | 0.06009 | 0.9 | 0.09880 | 0.8181 |
| GJ1-8                  | 8275  | 247 | 22.4 | 0.033 | 7494  | 0.08577 | 1.2 | 0.06008 | 0.9 | 0.09807 | 0.8118 |
| GJ1-9                  | 8177  | 246 | 22.5 | 0.033 | 9185  | 0.08616 | 0.9 | 0.06016 | 0.8 | 0.09853 | 0.8167 |
| GJ1-10                 | 7403  | 231 | 21.0 | 0.033 | 12435 | 0.08508 | 0.7 | 0.05956 | 0.7 | 0.09744 | 0.7996 |
| GJ1-11                 | 7456  | 232 | 21.1 | 0.033 | 12455 | 0.08500 | 0.8 | 0.05990 | 1.2 | 0.09735 | 0.8036 |
| GJ1-12                 | 7117  | 223 | 20.7 | 0.034 | 11875 | 0.08666 | 1.3 | 0.05999 | 0.7 | 0.09939 | 0.8215 |
| GJ1-13                 | 8103  | 263 | 24.2 | 0.034 | 8372  | 0.08646 | 1.0 | 0.06020 | 1.1 | 0.09918 | 0.8228 |
| <b>27.12.2009-seq6</b> |       |     |      |       |       |         |     |         |     |         |        |
| GJ1-1                  | 8717  | 228 | 20.8 | 0.033 | 7078  | 0.08883 | 1.0 | 0.06052 | 1.0 | 0.09793 | 0.8178 |
| GJ1-2                  | 9056  | 244 | 22.4 | 0.033 | 8757  | 0.09008 | 0.8 | 0.05961 | 1.2 | 0.09924 | 0.8163 |
| GJ1-3                  | 9446  | 259 | 23.9 | 0.032 | 8116  | 0.08995 | 1.1 | 0.06001 | 0.9 | 0.09902 | 0.8199 |
| GJ1-4                  | 9092  | 288 | 26.4 | 0.032 | 2570  | 0.09066 | 0.7 | 0.06003 | 1.0 | 0.09892 | 0.8194 |
| GJ1-5                  | 8445  | 271 | 24.8 | 0.033 | 2667  | 0.09008 | 1.1 | 0.05980 | 0.8 | 0.09820 | 0.8103 |
| GJ1-6                  | 7675  | 296 | 26.9 | 0.034 | 6309  | 0.09030 | 0.8 | 0.06012 | 1.1 | 0.09758 | 0.8095 |
| GJ1-7                  | 4447  | 176 | 15.9 | 0.033 | 7415  | 0.09022 | 1.3 | 0.05997 | 1.0 | 0.09742 | 0.8062 |
| GJ1-8                  | 3667  | 188 | 17.4 | 0.033 | 9026  | 0.09296 | 1.2 | 0.06025 | 0.9 | 0.09951 | 0.8272 |
| GJ1-9                  | 3023  | 154 | 14.0 | 0.034 | 1550  | 0.09179 | 1.1 | 0.06024 | 1.0 | 0.09818 | 0.8161 |
| GJ1-11                 | 2654  | 191 | 17.7 | 0.033 | 2766  | 0.09367 | 1.0 | 0.06003 | 1.0 | 0.09933 | 0.8227 |
| a44                    | 2146  | 153 | 13.7 | 0.034 | 7803  | 0.09284 | 1.4 | 0.06006 | 0.8 | 0.09837 | 0.8153 |
| GJ1-12                 | 2957  | 376 | 34.2 | 0.033 | 8413  | 0.09387 | 0.6 | 0.05993 | 0.9 | 0.09862 | 0.8156 |
| GJ1-13                 | 3804  | 509 | 46.4 | 0.034 | 2623  | 0.09355 | 0.8 | 0.05986 | 0.7 | 0.09820 | 0.8111 |
| <b>27.12.2009-seq7</b> |       |     |      |       |       |         |     |         |     |         |        |
| GJ1-1                  | 7726  | 249 | 22.9 | 0.031 | 5948  | 0.07901 | 0.9 | 0.06021 | 0.9 | 0.09848 | 0.8163 |
| GJ1-2                  | 7442  | 242 | 22.4 | 0.031 | 8612  | 0.07923 | 0.7 | 0.06040 | 0.8 | 0.09877 | 0.8213 |
| GJ1-3                  | 7242  | 237 | 21.6 | 0.031 | 8331  | 0.07894 | 1.1 | 0.06067 | 0.9 | 0.09841 | 0.8219 |
| a1                     | 7202  | 245 | 22.4 | 0.031 | 8269  | 0.07908 | 1.1 | 0.06007 | 0.9 | 0.09864 | 0.8157 |
| GJ1-4                  | 7359  | 252 | 23.3 | 0.031 | 7563  | 0.07971 | 0.7 | 0.06034 | 0.8 | 0.09942 | 0.8259 |
| GJ1-5                  | 7084  | 252 | 22.7 | 0.032 | 10016 | 0.07786 | 0.7 | 0.06036 | 0.9 | 0.09717 | 0.8075 |

|        |      |     |      |       |      |         |     |         |     |         |        |
|--------|------|-----|------|-------|------|---------|-----|---------|-----|---------|--------|
| GJ1-6  | 6766 | 239 | 21.8 | 0.032 | 8568 | 0.07856 | 1.1 | 0.06029 | 0.8 | 0.09804 | 0.8138 |
| GJ1-7  | 6563 | 240 | 22.0 | 0.032 | 8440 | 0.07911 | 0.9 | 0.06021 | 0.9 | 0.09879 | 0.8189 |
| GJ1-8  | 6187 | 228 | 20.7 | 0.032 | 8920 | 0.07819 | 0.8 | 0.05977 | 0.8 | 0.09765 | 0.8035 |
| GJ1-9  | 6810 | 259 | 23.9 | 0.032 | 9438 | 0.07945 | 0.6 | 0.05992 | 1.2 | 0.09927 | 0.8189 |
| GJ1-10 | 6228 | 242 | 22.3 | 0.032 | 8504 | 0.07944 | 1.0 | 0.05975 | 0.9 | 0.09927 | 0.8165 |
| GJ1-11 | 6034 | 238 | 21.9 | 0.031 | 9534 | 0.07886 | 0.9 | 0.06007 | 0.8 | 0.09859 | 0.8153 |
| GJ1-12 | 6149 | 249 | 22.8 | 0.032 | 9690 | 0.07841 | 1.3 | 0.06012 | 0.9 | 0.09803 | 0.8114 |

**27.12.2009-seq8**

|        |      |     |      |       |       |         |     |         |     |         |        |
|--------|------|-----|------|-------|-------|---------|-----|---------|-----|---------|--------|
| GJ1-1  | 6546 | 227 | 20.7 | 0.032 | 9933  | 0.07897 | 1.0 | 0.06104 | 1.0 | 0.09820 | 0.8214 |
| GJ1-2  | 6346 | 225 | 20.4 | 0.032 | 9347  | 0.07861 | 0.9 | 0.06081 | 0.8 | 0.09775 | 0.8145 |
| GJ1-3  | 6776 | 241 | 22.3 | 0.032 | 8098  | 0.07986 | 0.8 | 0.06067 | 0.8 | 0.09931 | 0.8256 |
| GJ1-4  | 7271 | 248 | 22.7 | 0.032 | 16296 | 0.07889 | 0.6 | 0.06086 | 0.9 | 0.09818 | 0.8188 |
| GJ1-5  | 7893 | 271 | 24.9 | 0.031 | 3785  | 0.07904 | 0.9 | 0.06003 | 0.7 | 0.09837 | 0.8092 |
| GJ1-6  | 7846 | 257 | 23.8 | 0.031 | 8341  | 0.07973 | 0.8 | 0.06078 | 0.8 | 0.09931 | 0.8271 |
| GJ1-7  | 7458 | 248 | 22.7 | 0.030 | 9073  | 0.07901 | 0.8 | 0.06000 | 1.0 | 0.09841 | 0.8091 |
| GJ1-8  | 7753 | 247 | 22.4 | 0.031 | 4772  | 0.07840 | 0.7 | 0.06012 | 0.6 | 0.09772 | 0.8051 |
| GJ1-9  | 7724 | 242 | 22.3 | 0.031 | 8625  | 0.07982 | 0.7 | 0.06089 | 0.8 | 0.09951 | 0.8303 |
| GJ1-10 | 8256 | 252 | 23.2 | 0.031 | 8479  | 0.07918 | 0.9 | 0.06016 | 0.5 | 0.09878 | 0.8142 |
| GJ1-11 | 8120 | 248 | 22.9 | 0.030 | 8883  | 0.07917 | 1.1 | 0.06020 | 1.0 | 0.09877 | 0.8148 |
| GJ1-12 | 7776 | 230 | 20.9 | 0.030 | 9685  | 0.07839 | 0.8 | 0.05997 | 0.7 | 0.09787 | 0.8042 |
| GJ1-13 | 8161 | 237 | 21.8 | 0.030 | 5774  | 0.07875 | 1.1 | 0.06029 | 0.9 | 0.09833 | 0.8123 |

**27.12.2009-seq9**

|        |      |     |      |       |       |         |     |         |     |         |        |
|--------|------|-----|------|-------|-------|---------|-----|---------|-----|---------|--------|
| GJ1-1  | 9152 | 253 | 23.3 | 0.032 | 5994  | 0.08828 | 1.0 | 0.06013 | 1.0 | 0.09884 | 0.8197 |
| GJ1-2  | 9007 | 250 | 22.9 | 0.032 | 9006  | 0.08839 | 0.9 | 0.06028 | 1.0 | 0.09908 | 0.8221 |
| GJ1-3  | 9130 | 256 | 23.5 | 0.033 | 8557  | 0.08763 | 1.1 | 0.06001 | 0.9 | 0.09836 | 0.8140 |
| GJ1-4  | 7978 | 243 | 22.2 | 0.033 | 8701  | 0.08615 | 1.1 | 0.06004 | 0.7 | 0.09825 | 0.8136 |
| GJ1-5  | 8036 | 248 | 22.5 | 0.033 | 7436  | 0.08612 | 1.1 | 0.06003 | 0.8 | 0.09836 | 0.8143 |
| GJ1-6  | 6892 | 229 | 20.9 | 0.033 | 9914  | 0.08444 | 1.0 | 0.06009 | 0.8 | 0.09801 | 0.8154 |
| GJ1-7  | 6170 | 211 | 19.3 | 0.033 | 9120  | 0.08458 | 0.9 | 0.06017 | 0.8 | 0.09831 | 0.8159 |
| GJ1-8  | 6290 | 235 | 21.5 | 0.032 | 10053 | 0.08336 | 1.0 | 0.06003 | 1.1 | 0.09851 | 0.8156 |
| GJ1-9  | 6073 | 233 | 21.2 | 0.032 | 9992  | 0.08265 | 0.9 | 0.05999 | 0.9 | 0.09781 | 0.8093 |
| GJ1-10 | 5849 | 246 | 22.3 | 0.032 | 10216 | 0.08165 | 0.9 | 0.06012 | 0.8 | 0.09827 | 0.8148 |
| GJ1-11 | 5801 | 250 | 23.1 | 0.032 | 8609  | 0.08269 | 0.8 | 0.05941 | 0.8 | 0.09966 | 0.8198 |
| GJ1-12 | 5458 | 260 | 23.9 | 0.032 | 17100 | 0.07998 | 0.8 | 0.06014 | 1.0 | 0.09806 | 0.8134 |
| GJ1-13 | 5381 | 262 | 24.2 | 0.033 | 14758 | 0.08062 | 1.0 | 0.06003 | 0.7 | 0.09898 | 0.8195 |

(a) Within run background-corrected mean  $^{207}\text{Pb}$  signal.

(b) corrected for background; Th/U ratio corrected for interelement fraction (measured ratio multiplied by 0.7

(c)  $^{206}\text{Pb}/^{238}\text{U}$  ratio determined after instrumental drift correction and normalisation.

(d)  $^{207}\text{Pb}/^{235}\text{U}$  calculated using  $^{207}\text{Pb}/^{206}\text{Pb}/(^{238}\text{U}/^{206}\text{Pb} \times 1/137.88)$

(e) corrected for mass bias of +0.02% to 0.6%, depending of tuning conditions.

(f) % deviation between measured and true 206/238 value of standard zircon GJ-1

| $\frac{^{206}\text{Pb}}{^{238}\text{U}}$ | 2 $\sigma$<br>(Ma) | $\frac{^{207}\text{Pb}}{^{235}\text{U}}$ | 2 $\sigma$<br>(Ma) | $\frac{^{207}\text{Pb}}{^{206}\text{Pb}}$ | 2 $\sigma$<br>(Ma) | Con. <sup>e</sup><br>% |
|------------------------------------------|--------------------|------------------------------------------|--------------------|-------------------------------------------|--------------------|------------------------|
| 3571                                     | 59                 | 3576                                     | 28                 | 3579                                      | 27                 | 100                    |
| 3656                                     | 44                 | 3649                                     | 18                 | 3646                                      | 14                 | 100                    |
| 3634                                     | 66                 | 3636                                     | 25                 | 3637                                      | 13                 | 100                    |
| 3656                                     | 66                 | 3654                                     | 27                 | 3652                                      | 20                 | 100                    |
| 3654                                     | 57                 | 3647                                     | 27                 | 3644                                      | 27                 | 100                    |
| 3625                                     | 61                 | 3650                                     | 27                 | 3664                                      | 23                 | 99                     |
| 2183                                     | 42                 | 2684                                     | 27                 | 3087                                      | 26                 | 71                     |
| 3634                                     | 64                 | 3638                                     | 25                 | 3641                                      | 16                 | 100                    |
| 2778                                     | 47                 | 3153                                     | 26                 | 3402                                      | 25                 | 82                     |
| 3639                                     | 55                 | 3642                                     | 24                 | 3644                                      | 21                 | 100                    |
| 3628                                     | 58                 | 3628                                     | 28                 | 3628                                      | 29                 | 100                    |
| 3569                                     | 77                 | 3569                                     | 31                 | 3570                                      | 20                 | 100                    |
| 3632                                     | 64                 | 3633                                     | 25                 | 3634                                      | 15                 | 100                    |
| 3639                                     | 55                 | 3639                                     | 23                 | 3640                                      | 17                 | 100                    |
| 3662                                     | 59                 | 3653                                     | 23                 | 3647                                      | 13                 | 100                    |
| 951                                      | 25                 | 1427                                     | 25                 | 2232                                      | 27                 | 43                     |
| 3663                                     | 55                 | 3639                                     | 25                 | 3625                                      | 24                 | 101                    |
| 3636                                     | 61                 | 3632                                     | 24                 | 3630                                      | 15                 | 100                    |
| 3637                                     | 63                 | 3618                                     | 25                 | 3607                                      | 18                 | 101                    |
| 3680                                     | 49                 | 3665                                     | 20                 | 3657                                      | 14                 | 101                    |
| 3157                                     | 62                 | 3438                                     | 29                 | 3606                                      | 22                 | 88                     |
| 3673                                     | 45                 | 3676                                     | 18                 | 3678                                      | 14                 | 100                    |
| 3651                                     | 50                 | 3637                                     | 20                 | 3629                                      | 14                 | 101                    |
| 3482                                     | 51                 | 3558                                     | 21                 | 3601                                      | 14                 | 97                     |
| 3663                                     | 57                 | 3657                                     | 22                 | 3654                                      | 13                 | 100                    |
| 3646                                     | 52                 | 3639                                     | 19                 | 3635                                      | 7                  | 100                    |
| 3669                                     | 95                 | 3652                                     | 36                 | 3642                                      | 19                 | 101                    |
| 1634                                     | 49                 | 2324                                     | 33                 | 3001                                      | 19                 | 54                     |
| 3680                                     | 54                 | 3682                                     | 22                 | 3683                                      | 17                 | 100                    |
| 3548                                     | 53                 | 3614                                     | 20                 | 3651                                      | 5                  | 97                     |
| 3081                                     | 45                 | 3281                                     | 22                 | 3405                                      | 20                 | 91                     |
| 3654                                     | 51                 | 3650                                     | 24                 | 3648                                      | 24                 | 100                    |
| 2778                                     | 52                 | 2990                                     | 24                 | 3136                                      | 14                 | 89                     |
| 3654                                     | 57                 | 3651                                     | 24                 | 3649                                      | 20                 | 100                    |
| 3506                                     | 53                 | 3571                                     | 22                 | 3608                                      | 15                 | 97                     |
| 3632                                     | 51                 | 3628                                     | 21                 | 3625                                      | 15                 | 100                    |
| 3687                                     | 75                 | 3652                                     | 29                 | 3634                                      | 18                 | 101                    |
| 3669                                     | 50                 | 3663                                     | 21                 | 3659                                      | 18                 | 100                    |
| 3204                                     | 57                 | 3196                                     | 23                 | 3190                                      | 11                 | 100                    |
| 3664                                     | 71                 | 3650                                     | 27                 | 3643                                      | 15                 | 101                    |
| 3155                                     | 38                 | 3148                                     | 18                 | 3143                                      | 17                 | 100                    |
| 3108                                     | 48                 | 3107                                     | 22                 | 3107                                      | 20                 | 100                    |
| 3130                                     | 36                 | 3129                                     | 19                 | 3128                                      | 19                 | 100                    |
| 3076                                     | 72                 | 3075                                     | 31                 | 3075                                      | 19                 | 100                    |
| 1501                                     | 37                 | 2435                                     | 33                 | 3345                                      | 34                 | 45                     |
| 1911                                     | 38                 | 2569                                     | 28                 | 3139                                      | 29                 | 61                     |
| 3026                                     | 44                 | 3410                                     | 22                 | 3645                                      | 20                 | 83                     |
| 3076                                     | 63                 | 3084                                     | 28                 | 3089                                      | 21                 | 100                    |

|      |     |      |     |      |    |     |
|------|-----|------|-----|------|----|-----|
| 3128 | 57  | 3128 | 26  | 3128 | 20 | 100 |
| 3116 | 48  | 3121 | 21  | 3124 | 13 | 100 |
| 3151 | 71  | 3167 | 35  | 3177 | 34 | 99  |
| 1210 | 36  | 2389 | 31  | 3638 | 13 | 33  |
| 2613 | 51  | 3238 | 25  | 3652 | 15 | 72  |
| 2287 | 31  | 2788 | 19  | 3173 | 19 | 72  |
| 2198 | 44  | 2621 | 30  | 2965 | 35 | 74  |
| 382  | 20  | 674  | 30  | 1830 | 49 | 21  |
| 3220 | 45  | 3228 | 20  | 3233 | 16 | 100 |
| 1353 | 42  | 2241 | 39  | 3193 | 40 | 42  |
| 3630 | 50  | 3630 | 26  | 3630 | 29 | 100 |
| 723  | 93  | 1858 | 124 | 3568 | 38 | 20  |
| 1794 | 75  | 2698 | 51  | 3468 | 33 | 52  |
| 3194 | 43  | 3498 | 20  | 3677 | 17 | 87  |
| 3642 | 62  | 3651 | 26  | 3657 | 20 | 100 |
| 3667 | 48  | 3688 | 19  | 3699 | 14 | 99  |
| 1493 | 50  | 2395 | 43  | 3286 | 42 | 45  |
| 3078 | 54  | 3455 | 24  | 3682 | 14 | 84  |
| 2636 | 44  | 2925 | 24  | 3129 | 22 | 84  |
| 3141 | 41  | 3154 | 19  | 3162 | 18 | 99  |
| 792  | 38  | 1311 | 43  | 2303 | 44 | 34  |
| 1316 | 39  | 2004 | 33  | 2813 | 27 | 47  |
| 2585 | 41  | 3096 | 24  | 3447 | 22 | 75  |
| 3130 | 57  | 3127 | 27  | 3125 | 24 | 100 |
| 3633 | 78  | 3640 | 34  | 3644 | 29 | 100 |
| 629  | 29  | 1049 | 35  | 2074 | 36 | 30  |
| 2930 | 59  | 3135 | 28  | 3269 | 21 | 90  |
| 2994 | 64  | 3074 | 27  | 3126 | 13 | 96  |
| 3620 | 57  | 3633 | 25  | 3641 | 22 | 99  |
| 3654 | 105 | 3669 | 40  | 3678 | 22 | 99  |
| 3557 | 107 | 3569 | 41  | 3576 | 20 | 99  |
| 3202 | 40  | 3206 | 19  | 3207 | 17 | 100 |
| 3010 | 37  | 3286 | 22  | 3459 | 24 | 87  |
| 3157 | 36  | 3173 | 17  | 3183 | 16 | 99  |
| 3705 | 74  | 3586 | 30  | 3520 | 24 | 105 |
| 2272 | 49  | 2828 | 29  | 3252 | 24 | 70  |
| 2798 | 66  | 3032 | 31  | 3191 | 21 | 88  |
| 3198 | 66  | 3201 | 28  | 3203 | 16 | 100 |
| 1396 | 60  | 1899 | 44  | 2506 | 25 | 56  |
| 1409 | 26  | 1723 | 20  | 2129 | 22 | 66  |
| 1080 | 44  | 1746 | 51  | 2673 | 67 | 40  |
| 3172 | 76  | 3166 | 33  | 3163 | 23 | 100 |
| 3108 | 78  | 3119 | 32  | 3127 | 17 | 99  |
| 3250 | 48  | 3238 | 23  | 3231 | 22 | 101 |
| 3223 | 49  | 3222 | 24  | 3221 | 23 | 100 |
| 3239 | 71  | 3232 | 32  | 3227 | 26 | 100 |
| 2587 | 86  | 3092 | 44  | 3439 | 31 | 75  |
| 2971 | 47  | 2947 | 21  | 2931 | 14 | 101 |
| 3234 | 74  | 3234 | 34  | 3235 | 29 | 100 |
| 2709 | 48  | 3049 | 25  | 3282 | 21 | 83  |
| 2881 | 49  | 3095 | 24  | 3238 | 18 | 89  |
| 2947 | 79  | 3182 | 37  | 3334 | 27 | 88  |

|      |     |      |     |      |    |     |
|------|-----|------|-----|------|----|-----|
| 1422 | 69  | 2249 | 51  | 3118 | 19 | 46  |
| 3231 | 51  | 3219 | 26  | 3211 | 27 | 101 |
| 3154 | 82  | 3162 | 47  | 3168 | 54 | 100 |
| 1878 | 70  | 2087 | 46  | 2299 | 49 | 82  |
| 983  | 30  | 1755 | 30  | 2857 | 22 | 34  |
| 3230 | 92  | 3231 | 39  | 3232 | 26 | 100 |
| 2088 | 61  | 2798 | 38  | 3360 | 29 | 62  |
| 1357 | 70  | 2223 | 57  | 3156 | 35 | 43  |
| 3113 | 47  | 3168 | 26  | 3203 | 30 | 97  |
| 3234 | 88  | 3239 | 40  | 3242 | 35 | 100 |
| 2094 | 44  | 2713 | 28  | 3212 | 25 | 65  |
| 3225 | 55  | 3225 | 24  | 3224 | 20 | 100 |
| 3229 | 52  | 3235 | 23  | 3239 | 18 | 100 |
| 3215 | 49  | 3217 | 26  | 3218 | 29 | 100 |
| 3588 | 52  | 3345 | 21  | 3202 | 14 | 112 |
| 1963 | 52  | 2661 | 37  | 3246 | 38 | 60  |
| 1780 | 32  | 2415 | 21  | 3004 | 16 | 59  |
| 3127 | 67  | 3143 | 30  | 3154 | 21 | 99  |
| 3211 | 45  | 3207 | 25  | 3205 | 30 | 100 |
| 3210 | 60  | 3214 | 31  | 3217 | 32 | 100 |
| 494  | 16  | 893  | 36  | 2077 | 87 | 24  |
| 1856 | 55  | 2582 | 36  | 3214 | 26 | 58  |
| 509  | 187 | 1390 | 338 | 3242 | 74 | 16  |
| 3229 | 45  | 3230 | 24  | 3231 | 27 | 100 |
| 1785 | 33  | 2301 | 25  | 2798 | 29 | 64  |
| 2725 | 38  | 2878 | 24  | 2987 | 28 | 91  |
| 2534 | 80  | 2948 | 43  | 3244 | 35 | 78  |
| 3256 | 66  | 3251 | 31  | 3249 | 27 | 100 |
| 3064 | 105 | 3081 | 44  | 3092 | 18 | 99  |
| 3568 | 59  | 3563 | 29  | 3560 | 31 | 100 |
| 870  | 20  | 1592 | 23  | 2747 | 23 | 32  |
| 2383 | 41  | 2795 | 22  | 3106 | 15 | 77  |
| 2490 | 48  | 3093 | 27  | 3513 | 23 | 71  |
| 3214 | 114 | 3234 | 50  | 3247 | 36 | 99  |
| 2098 | 73  | 2739 | 44  | 3253 | 32 | 64  |
| 2879 | 65  | 3057 | 33  | 3176 | 31 | 91  |
| 755  | 20  | 1414 | 27  | 2620 | 35 | 29  |
| 3251 | 49  | 3244 | 23  | 3240 | 22 | 100 |
| 437  | 11  | 871  | 26  | 2233 | 61 | 20  |
| 616  | 16  | 1127 | 22  | 2315 | 29 | 27  |
| 3539 | 65  | 3540 | 26  | 3541 | 16 | 100 |
| 3536 | 60  | 3536 | 22  | 3536 | 8  | 100 |
| 1053 | 17  | 1822 | 19  | 2868 | 22 | 37  |
| 1521 | 32  | 2364 | 26  | 3200 | 24 | 48  |
| 793  | 18  | 1525 | 21  | 2770 | 17 | 29  |
| 3536 | 68  | 3542 | 26  | 3545 | 14 | 100 |
| 3245 | 77  | 3391 | 31  | 3479 | 13 | 93  |
| 3247 | 42  | 3339 | 18  | 3396 | 12 | 96  |
| 404  | 10  | 901  | 29  | 2455 | 70 | 16  |
| 572  | 12  | 997  | 23  | 2104 | 51 | 27  |



|      |     |      |     |      |    |     |
|------|-----|------|-----|------|----|-----|
| 3208 | 84  | 3212 | 36  | 3214 | 24 | 100 |
| 2764 | 61  | 2980 | 32  | 3129 | 29 | 88  |
| 488  | 142 | 1335 | 252 | 3192 | 37 | 15  |
| 2987 | 115 | 3120 | 48  | 3207 | 15 | 93  |
| 3207 | 66  | 3202 | 28  | 3199 | 18 | 100 |
| 3228 | 76  | 3208 | 32  | 3195 | 18 | 101 |
| 3130 | 82  | 3177 | 35  | 3208 | 23 | 98  |
| 3422 | 55  | 3424 | 32  | 3426 | 38 | 100 |
| 3002 | 59  | 3002 | 37  | 3002 | 47 | 100 |
| 3216 | 63  | 3217 | 29  | 3218 | 26 | 100 |
| 3199 | 99  | 3205 | 41  | 3209 | 22 | 100 |
| 3438 | 75  | 3444 | 39  | 3448 | 41 | 100 |
| 3175 | 74  | 3176 | 31  | 3177 | 19 | 100 |
| 3205 | 99  | 3203 | 40  | 3203 | 15 | 100 |
| 2364 | 50  | 2682 | 27  | 2931 | 22 | 81  |
| 3201 | 108 | 3203 | 51  | 3204 | 46 | 100 |
| 3229 | 56  | 3209 | 25  | 3197 | 18 | 101 |
| 2069 | 94  | 2675 | 56  | 3172 | 37 | 65  |
| 3198 | 60  | 3204 | 27  | 3207 | 22 | 100 |
| 3234 | 74  | 3226 | 30  | 3221 | 17 | 100 |
| 3130 | 63  | 3129 | 27  | 3129 | 18 | 100 |
| 3210 | 43  | 3206 | 21  | 3204 | 21 | 100 |
| 3219 | 107 | 3215 | 48  | 3212 | 38 | 100 |
| 3196 | 45  | 3209 | 21  | 3217 | 20 | 99  |
| 3208 | 91  | 3206 | 42  | 3206 | 35 | 100 |
| 3233 | 63  | 3231 | 29  | 3230 | 25 | 100 |
| 3453 | 49  | 3449 | 25  | 3447 | 28 | 100 |
| 3439 | 88  | 3452 | 43  | 3460 | 44 | 99  |
| 3438 | 76  | 3457 | 31  | 3468 | 19 | 99  |
| 3454 | 70  | 3448 | 35  | 3445 | 35 | 100 |
| 3444 | 93  | 3446 | 37  | 3447 | 20 | 100 |
| 3455 | 63  | 3453 | 27  | 3452 | 21 | 100 |
| 3421 | 76  | 3423 | 37  | 3424 | 37 | 100 |
| 3469 | 63  | 3471 | 25  | 3472 | 17 | 100 |
| 3443 | 69  | 3444 | 31  | 3445 | 27 | 100 |
| 3470 | 73  | 3469 | 30  | 3468 | 20 | 100 |
| 3476 | 52  | 3466 | 23  | 3461 | 20 | 100 |
| 3445 | 100 | 3447 | 40  | 3448 | 24 | 100 |
| 3483 | 89  | 3477 | 37  | 3474 | 26 | 100 |
| 3459 | 101 | 3462 | 42  | 3464 | 27 | 100 |
| 3964 | 60  | 3639 | 23  | 3464 | 17 | 114 |
| 3441 | 60  | 3451 | 30  | 3457 | 31 | 100 |
| 3428 | 82  | 3440 | 37  | 3447 | 32 | 99  |
| 3441 | 80  | 3454 | 34  | 3461 | 24 | 99  |
| 3671 | 85  | 3551 | 34  | 3484 | 25 | 105 |
| 3453 | 95  | 3458 | 41  | 3460 | 32 | 100 |
| 3453 | 123 | 3456 | 51  | 3458 | 35 | 100 |
| 3461 | 106 | 3465 | 54  | 3468 | 56 | 100 |
| 3438 | 103 | 3437 | 44  | 3437 | 33 | 100 |
| 3953 | 59  | 3635 | 22  | 3465 | 16 | 114 |
| 3864 | 53  | 3576 | 20  | 3418 | 13 | 113 |
| 3431 | 83  | 3439 | 42  | 3443 | 43 | 100 |

|      |    |      |    |      |    |     |
|------|----|------|----|------|----|-----|
| 1761 | 57 | 2456 | 38 | 3096 | 24 | 57  |
| 3428 | 84 | 3433 | 38 | 3436 | 33 | 100 |
| 3417 | 57 | 3424 | 26 | 3428 | 22 | 100 |
| 3270 | 96 | 3348 | 39 | 3396 | 21 | 96  |
| 2740 | 47 | 3042 | 27 | 3247 | 28 | 84  |
| 3440 | 59 | 3439 | 26 | 3439 | 22 | 100 |
| 3251 | 70 | 3344 | 35 | 3401 | 34 | 96  |
| 3427 | 85 | 3430 | 34 | 3431 | 21 | 100 |
| 3118 | 77 | 3297 | 40 | 3407 | 39 | 92  |
| 3436 | 68 | 3442 | 31 | 3446 | 29 | 100 |
| 3424 | 74 | 3428 | 34 | 3431 | 31 | 100 |
| 2475 | 51 | 2889 | 33 | 3192 | 36 | 78  |
| 3440 | 97 | 3441 | 39 | 3442 | 23 | 100 |
| 2156 | 60 | 2843 | 36 | 3374 | 28 | 64  |
| 3441 | 73 | 3441 | 33 | 3441 | 29 | 100 |
| 3448 | 49 | 3449 | 23 | 3450 | 23 | 100 |
| 3452 | 88 | 3449 | 48 | 3448 | 54 | 100 |
| 3422 | 52 | 3427 | 24 | 3429 | 23 | 100 |
| 3411 | 71 | 3418 | 30 | 3422 | 24 | 100 |
| 3458 | 62 | 3455 | 30 | 3452 | 30 | 100 |
| 3435 | 64 | 3436 | 32 | 3436 | 34 | 100 |
| 2859 | 39 | 3190 | 23 | 3405 | 24 | 84  |
| 3435 | 53 | 3438 | 24 | 3440 | 20 | 100 |
| 3445 | 52 | 3443 | 23 | 3441 | 21 | 100 |
| 2150 | 53 | 2517 | 49 | 2828 | 69 | 76  |
| 3461 | 90 | 3452 | 42 | 3447 | 39 | 100 |
| 3426 | 42 | 3426 | 24 | 3426 | 30 | 100 |
| 3305 | 62 | 3398 | 27 | 3454 | 21 | 96  |
| 3430 | 51 | 3430 | 25 | 3430 | 25 | 100 |
| 3341 | 47 | 3403 | 25 | 3439 | 28 | 97  |
| 2031 | 77 | 2718 | 45 | 3277 | 20 | 62  |
| 3439 | 45 | 3434 | 21 | 3431 | 19 | 100 |
| 3439 | 54 | 3440 | 24 | 3441 | 21 | 100 |
| 3438 | 54 | 3433 | 22 | 3431 | 16 | 100 |
| 2766 | 48 | 3041 | 29 | 3227 | 33 | 86  |
| 3447 | 76 | 3452 | 30 | 3455 | 16 | 100 |
| 3449 | 56 | 3458 | 24 | 3464 | 19 | 100 |
| 3442 | 48 | 3440 | 23 | 3439 | 24 | 100 |
| 1239 | 19 | 1937 | 21 | 2797 | 27 | 44  |
| 3454 | 43 | 3459 | 24 | 3461 | 28 | 100 |
| 3411 | 58 | 3412 | 26 | 3412 | 24 | 100 |
| 3425 | 72 | 3430 | 31 | 3433 | 24 | 100 |
| 3475 | 79 | 3476 | 33 | 3476 | 25 | 100 |
| 3442 | 54 | 3443 | 26 | 3444 | 25 | 100 |
| 3455 | 51 | 3456 | 26 | 3457 | 27 | 100 |
| 3438 | 57 | 3441 | 26 | 3442 | 25 | 100 |
| 3419 | 57 | 3422 | 28 | 3423 | 29 | 100 |
| 3458 | 81 | 3458 | 34 | 3458 | 24 | 100 |
| 3444 | 57 | 3444 | 30 | 3445 | 33 | 100 |
| 3418 | 75 | 3421 | 35 | 3422 | 34 | 100 |
| 2342 | 40 | 2882 | 22 | 3284 | 17 | 71  |

|      |    |      |    |      |    |     |
|------|----|------|----|------|----|-----|
| 3411 | 47 | 3423 | 22 | 3430 | 20 | 99  |
| 3317 | 64 | 3312 | 28 | 3309 | 23 | 100 |
| 3313 | 47 | 3310 | 21 | 3309 | 19 | 100 |
| 3321 | 53 | 3325 | 25 | 3327 | 24 | 100 |
| 3311 | 65 | 3319 | 29 | 3324 | 24 | 100 |
| 3323 | 54 | 3320 | 25 | 3318 | 22 | 100 |
| 3330 | 64 | 3320 | 26 | 3314 | 16 | 100 |
| 3355 | 53 | 3329 | 22 | 3313 | 14 | 101 |
| 3235 | 71 | 3261 | 30 | 3278 | 19 | 99  |
| 2723 | 84 | 3047 | 39 | 3268 | 21 | 83  |
| 3331 | 52 | 3316 | 25 | 3306 | 24 | 101 |
| 3351 | 63 | 3338 | 27 | 3330 | 18 | 101 |
| 3318 | 89 | 3321 | 38 | 3323 | 27 | 100 |
| 3336 | 55 | 3326 | 24 | 3321 | 19 | 100 |
| 3325 | 70 | 3320 | 29 | 3317 | 17 | 100 |
| 3329 | 56 | 3330 | 22 | 3331 | 12 | 100 |
| 3329 | 56 | 3321 | 26 | 3317 | 23 | 100 |
| 3324 | 47 | 3322 | 21 | 3321 | 18 | 100 |
| 2912 | 43 | 3134 | 20 | 3279 | 14 | 89  |
| 3314 | 71 | 3316 | 30 | 3317 | 20 | 100 |
| 3316 | 59 | 3319 | 26 | 3321 | 22 | 100 |
| 3335 | 76 | 3333 | 31 | 3332 | 19 | 100 |
| 3361 | 47 | 3335 | 22 | 3319 | 20 | 101 |
| 3390 | 46 | 3346 | 19 | 3320 | 15 | 102 |
| 3298 | 66 | 3311 | 32 | 3319 | 32 | 99  |
| 3393 | 48 | 3341 | 23 | 3310 | 22 | 103 |
| 3344 | 49 | 3332 | 22 | 3324 | 18 | 101 |
| 3326 | 68 | 3323 | 28 | 3322 | 19 | 100 |
| 3202 | 98 | 3222 | 49 | 3235 | 47 | 99  |
| 3245 | 54 | 3243 | 25 | 3241 | 22 | 100 |
| 3222 | 93 | 3219 | 41 | 3217 | 29 | 100 |
| 3234 | 64 | 3236 | 27 | 3238 | 17 | 100 |
| 3235 | 44 | 3238 | 20 | 3240 | 17 | 100 |
| 3259 | 48 | 3256 | 22 | 3255 | 20 | 100 |
| 3257 | 52 | 3256 | 23 | 3255 | 19 | 100 |
| 3127 | 55 | 3254 | 24 | 3334 | 17 | 94  |
| 3084 | 50 | 3134 | 24 | 3167 | 21 | 97  |
| 2109 | 96 | 2224 | 52 | 2331 | 31 | 90  |
| 2694 | 64 | 2985 | 33 | 3187 | 27 | 85  |
| 3234 | 67 | 3237 | 28 | 3239 | 18 | 100 |
| 3248 | 52 | 3246 | 21 | 3245 | 13 | 100 |
| 3131 | 45 | 3186 | 23 | 3221 | 24 | 97  |
| 3221 | 55 | 3225 | 26 | 3228 | 25 | 100 |
| 3238 | 53 | 3239 | 28 | 3239 | 31 | 100 |
| 3400 | 51 | 3329 | 25 | 3286 | 26 | 103 |
| 3355 | 56 | 3360 | 22 | 3363 | 13 | 100 |
| 3231 | 79 | 3234 | 34 | 3237 | 22 | 100 |
| 3241 | 58 | 3237 | 25 | 3235 | 19 | 100 |
| 3232 | 53 | 3234 | 24 | 3235 | 21 | 100 |
| 3240 | 72 | 3237 | 31 | 3235 | 23 | 100 |
| 3219 | 55 | 3222 | 25 | 3224 | 20 | 100 |

|      |     |      |     |      |    |     |
|------|-----|------|-----|------|----|-----|
| 3232 | 54  | 3237 | 24  | 3240 | 19 | 100 |
| 3279 | 56  | 3278 | 27  | 3278 | 25 | 100 |
| 2698 | 49  | 2994 | 25  | 3199 | 21 | 84  |
| 3225 | 57  | 3225 | 26  | 3226 | 21 | 100 |
| 3227 | 55  | 3229 | 26  | 3231 | 24 | 100 |
| 3225 | 56  | 3223 | 27  | 3221 | 25 | 100 |
| 3039 | 84  | 3107 | 41  | 3151 | 36 | 96  |
| 3117 | 51  | 3116 | 25  | 3115 | 24 | 100 |
| 3226 | 71  | 3233 | 32  | 3238 | 26 | 100 |
| 3213 | 67  | 3218 | 31  | 3221 | 26 | 100 |
| 3219 | 71  | 3220 | 33  | 3220 | 29 | 100 |
| 3224 | 66  | 3222 | 34  | 3221 | 36 | 100 |
| 3207 | 78  | 3215 | 41  | 3220 | 45 | 100 |
| 3209 | 69  | 3210 | 29  | 3210 | 18 | 100 |
| 2114 | 63  | 2653 | 37  | 3094 | 27 | 68  |
| 3172 | 69  | 3175 | 36  | 3177 | 37 | 100 |
| 3201 | 64  | 3205 | 35  | 3207 | 40 | 100 |
| 2961 | 51  | 3103 | 32  | 3197 | 39 | 93  |
| 2259 | 34  | 2679 | 26  | 3013 | 34 | 75  |
| 3237 | 86  | 3239 | 36  | 3241 | 23 | 100 |
| 3230 | 40  | 3215 | 18  | 3206 | 16 | 101 |
| 3204 | 41  | 3208 | 22  | 3211 | 26 | 100 |
| 2803 | 39  | 3019 | 22  | 3167 | 22 | 89  |
| 1180 | 26  | 1786 | 23  | 2591 | 22 | 46  |
| 1947 | 50  | 2564 | 30  | 3095 | 18 | 63  |
| 3227 | 63  | 3230 | 30  | 3232 | 29 | 100 |
| 2593 | 57  | 2947 | 29  | 3199 | 21 | 81  |
| 3232 | 48  | 3225 | 21  | 3221 | 17 | 100 |
| 540  | 107 | 1386 | 169 | 3133 | 32 | 17  |
| 3220 | 55  | 3216 | 30  | 3213 | 34 | 100 |
| 3224 | 65  | 3217 | 31  | 3212 | 28 | 100 |
| 3221 | 82  | 3214 | 39  | 3210 | 36 | 100 |
| 3208 | 48  | 3212 | 28  | 3214 | 33 | 100 |
| 3185 | 75  | 3201 | 32  | 3212 | 22 | 99  |
| 3008 | 48  | 3100 | 22  | 3161 | 17 | 95  |
| 835  | 31  | 1358 | 33  | 2315 | 31 | 36  |
| 515  | 18  | 840  | 25  | 1838 | 44 | 28  |
| 1104 | 23  | 1777 | 23  | 2694 | 24 | 41  |
| 1260 | 27  | 1896 | 25  | 2688 | 27 | 47  |
| 1862 | 41  | 2363 | 30  | 2829 | 33 | 66  |
| 2447 | 54  | 2786 | 31  | 3041 | 28 | 80  |
| 3054 | 82  | 3053 | 36  | 3052 | 24 | 100 |
| 1603 | 50  | 2210 | 40  | 2833 | 41 | 57  |
| 1066 | 20  | 1729 | 23  | 2662 | 31 | 40  |
| 2271 | 46  | 2578 | 25  | 2830 | 21 | 80  |
| 1592 | 30  | 2185 | 24  | 2800 | 25 | 57  |
| 3076 | 72  | 3077 | 38  | 3078 | 39 | 100 |
| 3061 | 71  | 3061 | 31  | 3061 | 21 | 100 |
| 3063 | 52  | 3061 | 30  | 3060 | 35 | 100 |
| 3087 | 53  | 3085 | 25  | 3084 | 22 | 100 |
| 620  | 13  | 974  | 26  | 1892 | 62 | 33  |

|      |     |      |     |      |     |     |
|------|-----|------|-----|------|-----|-----|
| 1033 | 23  | 1690 | 33  | 2641 | 52  | 39  |
| 765  | 26  | 1241 | 41  | 2201 | 76  | 35  |
| 1593 | 47  | 2332 | 34  | 3060 | 26  | 52  |
| 1591 | 46  | 2298 | 34  | 3003 | 28  | 53  |
| 2226 | 42  | 2684 | 24  | 3050 | 20  | 73  |
| 100  | 4   | 176  | 9   | 1376 | 73  | 7   |
| 160  | 23  | 395  | 56  | 2191 | 147 | 7   |
|      |     |      |     |      |     |     |
| 2386 | 35  | 2540 | 19  | 2665 | 16  | 90  |
| 2727 | 53  | 2726 | 29  | 2725 | 31  | 100 |
| 2715 | 53  | 2718 | 31  | 2721 | 36  | 100 |
| 2144 | 30  | 2419 | 18  | 2659 | 16  | 81  |
| 2418 | 52  | 2564 | 27  | 2681 | 22  | 90  |
| 1704 | 36  | 2099 | 29  | 2513 | 35  | 68  |
| 2420 | 44  | 2600 | 27  | 2744 | 30  | 88  |
| 2006 | 31  | 2401 | 19  | 2756 | 17  | 73  |
| 1519 | 24  | 1983 | 19  | 2508 | 21  | 61  |
| 366  | 21  | 741  | 37  | 2142 | 58  | 17  |
| 1937 | 46  | 2341 | 29  | 2715 | 25  | 71  |
| 2498 | 37  | 2621 | 21  | 2717 | 21  | 92  |
| 1468 | 49  | 2072 | 35  | 2741 | 18  | 54  |
| 901  | 53  | 1594 | 52  | 2689 | 15  | 33  |
| 2733 | 37  | 2730 | 20  | 2727 | 21  | 100 |
| 2722 | 52  | 2717 | 27  | 2713 | 27  | 100 |
| 2344 | 43  | 2559 | 22  | 2734 | 16  | 86  |
| 2761 | 35  | 2743 | 18  | 2731 | 18  | 101 |
| 2720 | 43  | 2721 | 25  | 2722 | 29  | 100 |
| 2577 | 36  | 2679 | 19  | 2758 | 17  | 93  |
| 2511 | 37  | 2633 | 19  | 2728 | 16  | 92  |
| 1329 | 54  | 1969 | 41  | 2729 | 17  | 49  |
| 1247 | 40  | 1864 | 32  | 2643 | 15  | 47  |
| 2512 | 36  | 2641 | 20  | 2741 | 20  | 92  |
| 2732 | 49  | 2736 | 27  | 2740 | 28  | 100 |
| 2283 | 39  | 2519 | 21  | 2715 | 15  | 84  |
| 2304 | 42  | 2512 | 23  | 2685 | 19  | 86  |
| 2694 | 40  | 2700 | 20  | 2704 | 17  | 100 |
| 2479 | 44  | 2608 | 23  | 2709 | 19  | 91  |
| 2054 | 34  | 2398 | 22  | 2704 | 25  | 76  |
| 2738 | 39  | 2731 | 20  | 2725 | 19  | 100 |
| 2739 | 37  | 2734 | 20  | 2730 | 22  | 100 |
| 2712 | 44  | 2723 | 25  | 2730 | 29  | 99  |
| 2704 | 47  | 2710 | 24  | 2713 | 21  | 100 |
| 2394 | 43  | 2562 | 23  | 2697 | 19  | 89  |
| 2702 | 45  | 2705 | 22  | 2708 | 18  | 100 |
| 2730 | 47  | 2730 | 31  | 2730 | 39  | 100 |
| 2569 | 39  | 2663 | 21  | 2736 | 20  | 94  |
|      |     |      |     |      |     |     |
| 1352 | 42  | 1929 | 43  | 2622 | 58  | 52  |
| 1007 | 119 | 1369 | 108 | 1989 | 88  | 51  |
| 2733 | 65  | 2735 | 39  | 2736 | 45  | 100 |
| 2718 | 47  | 2720 | 31  | 2722 | 40  | 100 |
| 2017 | 81  | 2384 | 49  | 2715 | 39  | 74  |
| 2859 | 49  | 2779 | 25  | 2720 | 25  | 105 |

|      |     |      |    |      |     |     |
|------|-----|------|----|------|-----|-----|
| 2724 | 59  | 2728 | 38 | 2731 | 47  | 100 |
| 2733 | 54  | 2737 | 30 | 2740 | 33  | 100 |
| 2736 | 81  | 2729 | 45 | 2723 | 48  | 100 |
| 857  | 55  | 1430 | 55 | 2430 | 29  | 35  |
| 449  | 32  | 726  | 50 | 1715 | 105 | 26  |
| 860  | 28  | 1223 | 37 | 1937 | 68  | 44  |
| 1647 | 27  | 1927 | 32 | 2244 | 53  | 73  |
| 2708 | 47  | 2707 | 24 | 2706 | 23  | 100 |
| 800  | 76  | 1514 | 84 | 2732 | 37  | 29  |
| 2717 | 37  | 2718 | 23 | 2719 | 29  | 100 |
| 2723 | 56  | 2727 | 55 | 2729 | 83  | 100 |
| 2714 | 60  | 2718 | 35 | 2722 | 40  | 100 |
| 2692 | 102 | 2706 | 47 | 2717 | 29  | 99  |
| 2738 | 66  | 2742 | 42 | 2745 | 52  | 100 |
| 2733 | 65  | 2729 | 37 | 2725 | 42  | 100 |

|      |     |      |     |      |    |     |
|------|-----|------|-----|------|----|-----|
| 1248 | 62  | 1873 | 50  | 2659 | 28 | 47  |
| 2743 | 44  | 2742 | 27  | 2741 | 34 | 100 |
| 1722 | 41  | 2178 | 30  | 2640 | 30 | 65  |
| 971  | 44  | 1389 | 39  | 2107 | 26 | 46  |
| 2726 | 49  | 2722 | 33  | 2719 | 44 | 100 |
| 2722 | 59  | 2722 | 49  | 2722 | 70 | 100 |
| 2716 | 75  | 2730 | 53  | 2740 | 70 | 99  |
| 2716 | 91  | 2715 | 49  | 2714 | 51 | 100 |
| 2736 | 56  | 2737 | 30  | 2737 | 30 | 100 |
| 2719 | 75  | 2724 | 41  | 2727 | 42 | 100 |
| 1677 | 75  | 2178 | 50  | 2690 | 32 | 62  |
| 2718 | 60  | 2714 | 39  | 2710 | 51 | 100 |
| 1621 | 56  | 1984 | 44  | 2387 | 52 | 68  |
| 2732 | 41  | 2732 | 25  | 2731 | 31 | 100 |
| 2744 | 51  | 2744 | 28  | 2744 | 30 | 100 |
| 2681 | 66  | 2704 | 36  | 2720 | 38 | 99  |
| 1783 | 43  | 2264 | 30  | 2732 | 29 | 65  |
| 2705 | 52  | 2701 | 26  | 2699 | 24 | 100 |
| 2718 | 50  | 2719 | 33  | 2721 | 44 | 100 |
| 2723 | 69  | 2716 | 37  | 2710 | 37 | 100 |
| 2726 | 54  | 2725 | 26  | 2725 | 21 | 100 |
| 2304 | 55  | 2521 | 33  | 2701 | 34 | 85  |
| 2732 | 60  | 2742 | 34  | 2749 | 37 | 99  |
| 1999 | 52  | 2343 | 38  | 2657 | 47 | 75  |
| 1583 | 41  | 2141 | 34  | 2730 | 40 | 58  |
| 421  | 116 | 1011 | 200 | 2685 | 43 | 16  |
| 2747 | 88  | 2748 | 43  | 2749 | 33 | 100 |
| 427  | 64  | 1033 | 106 | 2714 | 47 | 16  |

|     |   |     |   |     |    |     |
|-----|---|-----|---|-----|----|-----|
| 336 | 6 | 337 | 6 | 344 | 26 | 97  |
| 339 | 5 | 340 | 6 | 344 | 28 | 98  |
| 340 | 5 | 338 | 5 | 328 | 18 | 104 |
| 341 | 6 | 339 | 6 | 326 | 23 | 104 |
| 341 | 6 | 339 | 6 | 326 | 28 | 105 |
| 339 | 5 | 339 | 5 | 346 | 18 | 98  |
| 340 | 6 | 341 | 6 | 344 | 23 | 99  |
| 338 | 6 | 337 | 6 | 329 | 23 | 103 |

|     |   |     |   |     |    |     |
|-----|---|-----|---|-----|----|-----|
| 339 | 5 | 338 | 6 | 331 | 23 | 102 |
| 339 | 6 | 340 | 6 | 349 | 22 | 97  |
| 336 | 6 | 336 | 5 | 338 | 14 | 99  |
| 333 | 6 | 332 | 6 | 327 | 19 | 102 |
| 335 | 6 | 335 | 6 | 335 | 22 | 100 |
| 334 | 6 | 334 | 6 | 331 | 26 | 101 |
| 337 | 6 | 337 | 6 | 333 | 18 | 101 |

) model Pb composition and subsequently  
137.88)

| $2\sigma$<br>% | $\frac{^{207}\text{Pb}^e}{^{206}\text{Pb}}$ | dev% <sup>f</sup> |
|----------------|---------------------------------------------|-------------------|
|----------------|---------------------------------------------|-------------------|

|     |         |    |
|-----|---------|----|
| 1.2 | 0.05938 | 14 |
| 1.3 | 0.06019 | 14 |
| 1.3 | 0.06006 | 14 |
| 1.3 | 0.06001 | 14 |
| 1.3 | 0.06002 | 15 |
| 1.2 | 0.06026 | 15 |
| 1.3 | 0.06014 | 15 |
| 1.1 | 0.06032 | 15 |
| 1.2 | 0.06014 | 16 |
| 1.3 | 0.06011 | 16 |

| $\frac{^{206}\text{Pb}^{**}}{^{238}\text{U}}$ | $\frac{^{207}\text{Pb}}{^{206}\text{Pb}}$ |
|-----------------------------------------------|-------------------------------------------|
| 0.09850                                       | 0.06006                                   |
| 0.00120                                       | 0.00052                                   |
| 1.2                                           | 0.9                                       |
| #NAME?                                        | #NAME?                                    |

|     |         |    |
|-----|---------|----|
| 1.2 | 0.06012 | 16 |
| 1.2 | 0.06073 | 16 |
| 1.0 | 0.06051 | 16 |
| 1.1 | 0.06018 | 15 |
| 1.2 | 0.05990 | 15 |
| 1.3 | 0.06001 | 15 |
| 1.3 | 0.06016 | 15 |
| 1.6 | 0.06017 | 15 |
| 1.3 | 0.05953 | 15 |
| 1.0 | 0.05949 | 15 |
| 1.2 | 0.06044 | 15 |
| 1.2 | 0.05966 | 15 |
| 1.5 | 0.06012 | 15 |

| $\frac{^{206}\text{Pb}^{**}}{^{238}\text{U}}$ | $\frac{^{207}\text{Pb}}{^{206}\text{Pb}}$ |
|-----------------------------------------------|-------------------------------------------|
| 0.09850                                       | 0.06008                                   |
| 0.00130                                       | 0.00074                                   |
| 1.3                                           | 1.2                                       |
| #NAME?                                        | #NAME?                                    |

|     |         |   |
|-----|---------|---|
| 1.7 | 0.05994 | 2 |
| 2.0 | 0.06005 | 2 |
| 1.2 | 0.06015 | 2 |
| 1.2 | 0.06001 | 3 |
| 1.4 | 0.05993 | 3 |
| 1.3 | 0.05980 | 4 |
| 1.2 | 0.05989 | 4 |
| 1.5 | 0.05970 | 4 |
| 1.5 | 0.06059 | 4 |

| $\frac{^{206}\text{Pb}^{**}}{^{238}\text{U}}$ | $\frac{^{207}\text{Pb}}{^{206}\text{Pb}}$ |
|-----------------------------------------------|-------------------------------------------|
|                                               |                                           |
|                                               |                                           |
|                                               |                                           |
|                                               |                                           |

1.1 0.05975 5  
 1.4 0.05993 5  
 1.0 0.06096 5  
 1.2 0.06038 5

|         |         |
|---------|---------|
| 0.09850 | 0.06008 |
| 0.00136 | 0.00072 |
| 1.4     | 1.2     |
| #NAME?  | #NAME?  |

1.4 0.05995 8  
 1.5 0.06000 8

1.6 0.05995 9  
 1.3 0.06007 9  
 1.6 0.06011 9  
 1.5 0.06002 9  
 1.2 0.06028 9  
 1.4 0.06011 10  
 1.6 0.06007 10  
 1.1 0.05997 10  
 1.8 0.05984 10  
 1.5 0.06060 10

|                                               |                                           |
|-----------------------------------------------|-------------------------------------------|
| $\frac{^{206}\text{Pb}^{**}}{^{238}\text{U}}$ | $\frac{^{207}\text{Pb}}{^{235}\text{Pb}}$ |
| 0.09850                                       | 0.06008                                   |
| 0.00114                                       | 0.00039                                   |
| 1.2                                           | 0.7                                       |
| #NAME?                                        | #NAME?                                    |

1.2 0.06001 14  
 1.3 0.05996 14  
 1.5 0.06011 14  
 1.2 0.06038 14  
 1.8 0.06074 14  
 1.6 0.06006 14  
 1.3 0.06005 14  
 1.5 0.06004 14  
 1.2 0.06012 14  
 1.0 0.05952 15  
 1.4 0.05987 15  
 1.4 0.05995 15  
 1.5 0.06017 15

|                                               |                                           |
|-----------------------------------------------|-------------------------------------------|
| $\frac{^{206}\text{Pb}^{**}}{^{238}\text{U}}$ | $\frac{^{207}\text{Pb}}{^{235}\text{Pb}}$ |
| 0.09850                                       | 0.06008                                   |
| 0.00148                                       | 0.00056                                   |
| 1.5                                           | 0.9                                       |
| #NAME?                                        | #NAME?                                    |

1.4 0.06057 10  
 1.4 0.05966 10  
 1.4 0.06005 10  
 1.2 0.06008 9  
 1.4 0.05984 9  
 1.3 0.06017 8  
 1.6 0.06002 8  
 1.5 0.06030 7  
 1.5 0.06029 7  
 1.4 0.06008 6  
 1.6 0.06011 6  
 1.1 0.05998 5  
 1.1 0.05990 5

|                                               |                                           |
|-----------------------------------------------|-------------------------------------------|
| $\frac{^{206}\text{Pb}^{**}}{^{238}\text{U}}$ | $\frac{^{207}\text{Pb}}{^{235}\text{Pb}}$ |
| 0.09850                                       | 0.06008                                   |
| 0.00133                                       | 0.00045                                   |
| 1.4                                           | 0.8                                       |
| #NAME?                                        | #NAME?                                    |

1.3 0.06012 25  
 1.0 0.06031 25  
 1.4 0.06058 25  
 1.4 0.05998 25  
 1.1 0.06025 25  
 1.1 0.06027 25



1.4 0.06020 25  
 1.3 0.06012 25  
 1.2 0.05968 25  
 1.3 0.05983 25  
 1.3 0.05966 25  
 1.2 0.05998 25  
 1.6 0.06003 25

| $\frac{^{206}\text{Pb}^{**}}{^{238}\text{U}}$ | $\frac{^{207}\text{Pb}}{^{235}\text{Pb}}$ |
|-----------------------------------------------|-------------------------------------------|
| 0.09850                                       | 0.06008                                   |
| 0.00131                                       | 0.00052                                   |
| 1.3                                           | 0.9                                       |
| #NAME?                                        | #NAME?                                    |

1.4 0.06067 24  
 1.2 0.06043 24  
 1.1 0.06030 24  
 1.1 0.06049 24  
 1.2 0.05966 24  
 1.1 0.06041 25  
 1.2 0.05963 25  
 0.9 0.05975 25  
 1.1 0.06051 25  
 1.1 0.05978 25  
 1.5 0.05983 25  
 1.1 0.05960 25  
 1.4 0.05991 25

| $\frac{^{206}\text{Pb}^{**}}{^{238}\text{U}}$ | $\frac{^{207}\text{Pb}}{^{235}\text{Pb}}$ |
|-----------------------------------------------|-------------------------------------------|
| 0.09850                                       | 0.06008                                   |
| 0.00119                                       | 0.00079                                   |
| 1.2                                           | 1.3                                       |
| #NAME?                                        | #NAME?                                    |

1.4 0.06015 12  
 1.4 0.06030 12  
 1.4 0.06002 12  
 1.3 0.06005 14  
 1.4 0.06005 14  
 1.3 0.06010 16  
 1.2 0.06019 16  
 1.4 0.06005 18  
 1.3 0.06001 18  
 1.2 0.06014 20  
 1.2 0.05943 21  
 1.3 0.06016 23  
 1.3 0.06005 23

| $\frac{^{206}\text{Pb}^{**}}{^{238}\text{U}}$ | $\frac{^{207}\text{Pb}}{^{235}\text{Pb}}$ |
|-----------------------------------------------|-------------------------------------------|
| 0.09850                                       | 0.06005                                   |
| 0.00102                                       | 0.00041                                   |
| 1.0                                           | 0.68                                      |
| #NAME?                                        | #NAME?                                    |

'8)
