# Supplementary material
Source: publisher figshare collection journal article supplement (https://geolsoc.figshare.com/articles/dataset/_/3452852)
Supplement: Supplementary file 2 [file 1]

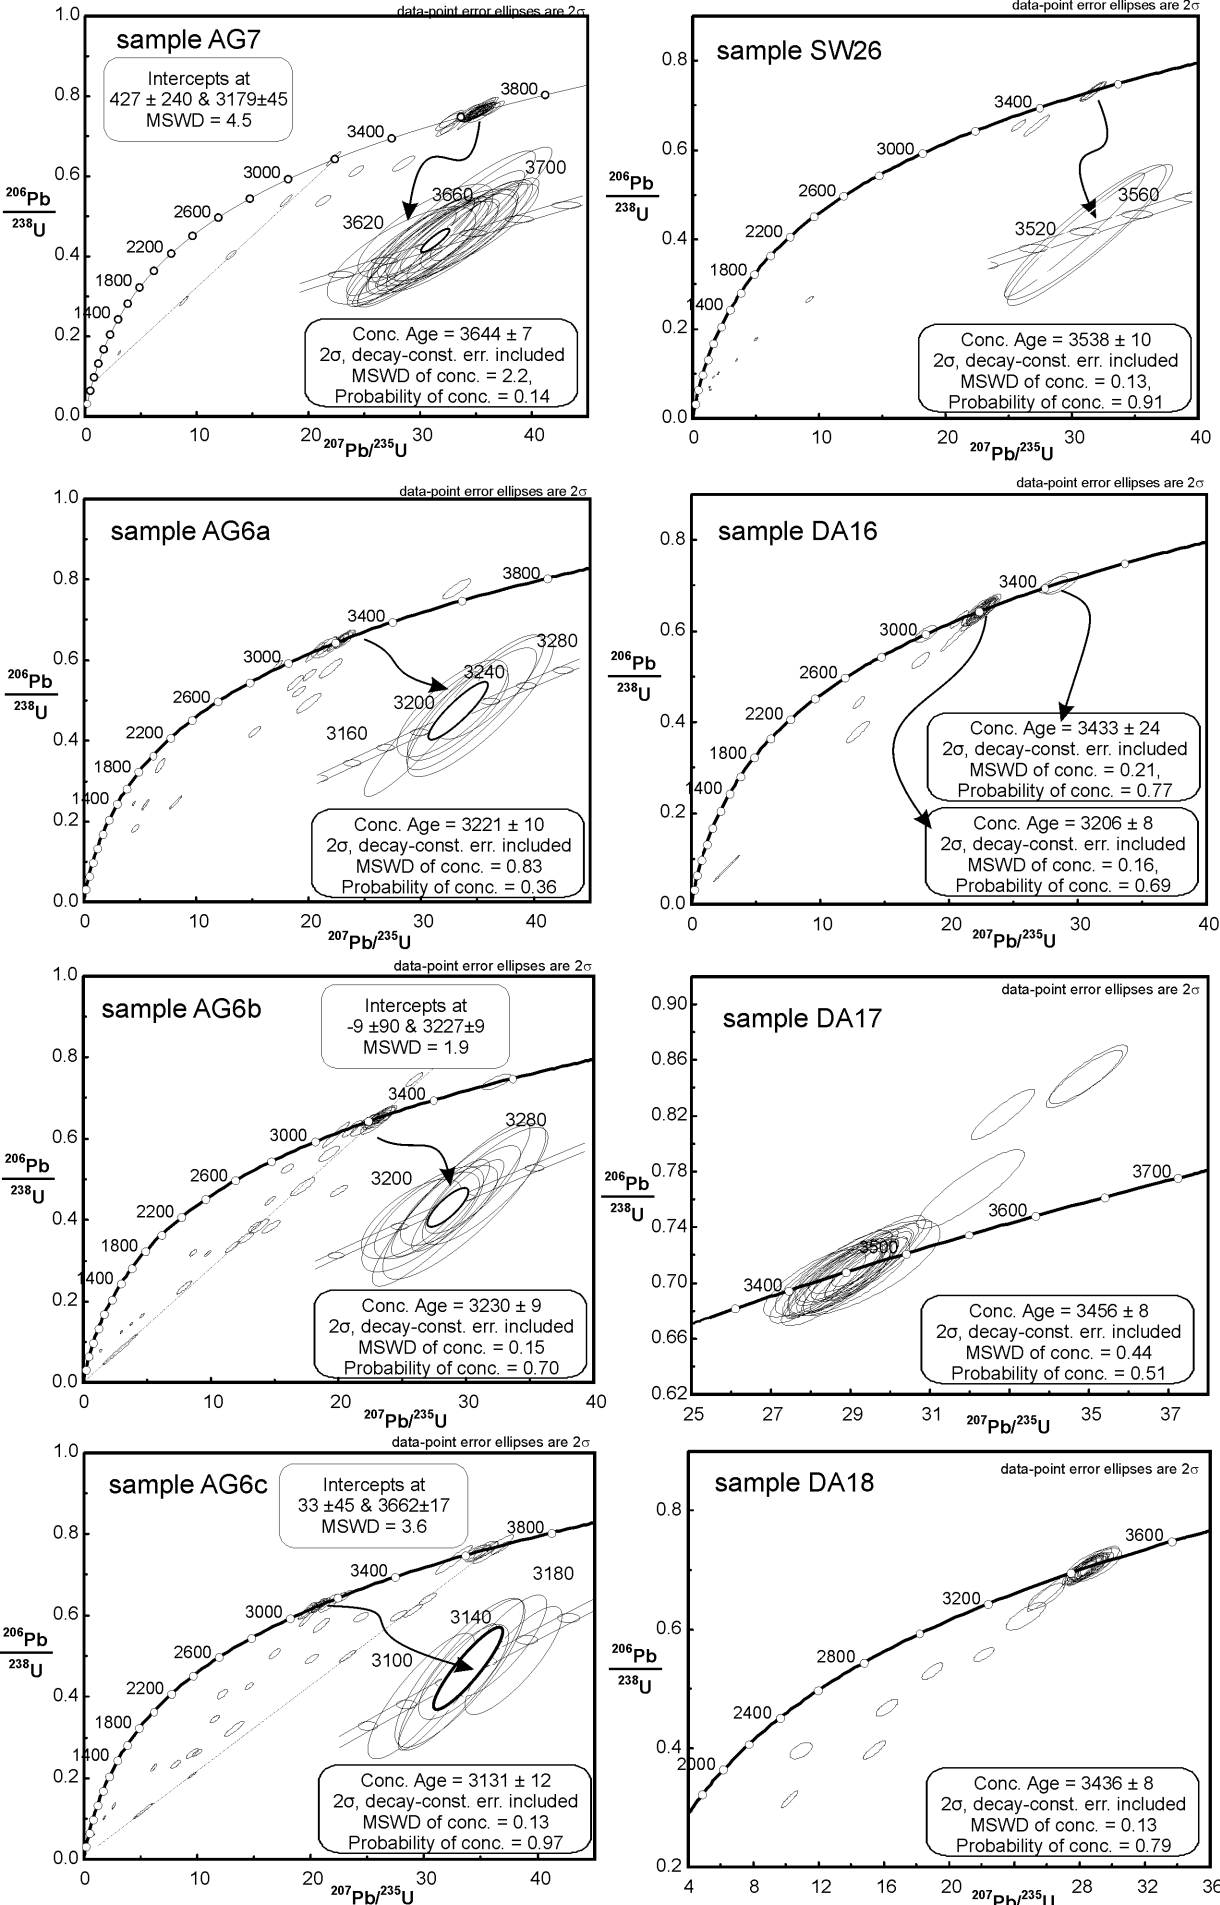

Fig. S1 (supplementary material). Concordia diagrams showing the results of U-Pb dating for sample AG7, AG6a, AG6b, AG6c, SW26, DA16, DA17, DA18.
