# Supplementary material
Source: publisher figshare collection journal article supplement (https://geolsoc.figshare.com/articles/dataset/_/3452852)
Supplement: Supplementary file 3 [file 1]

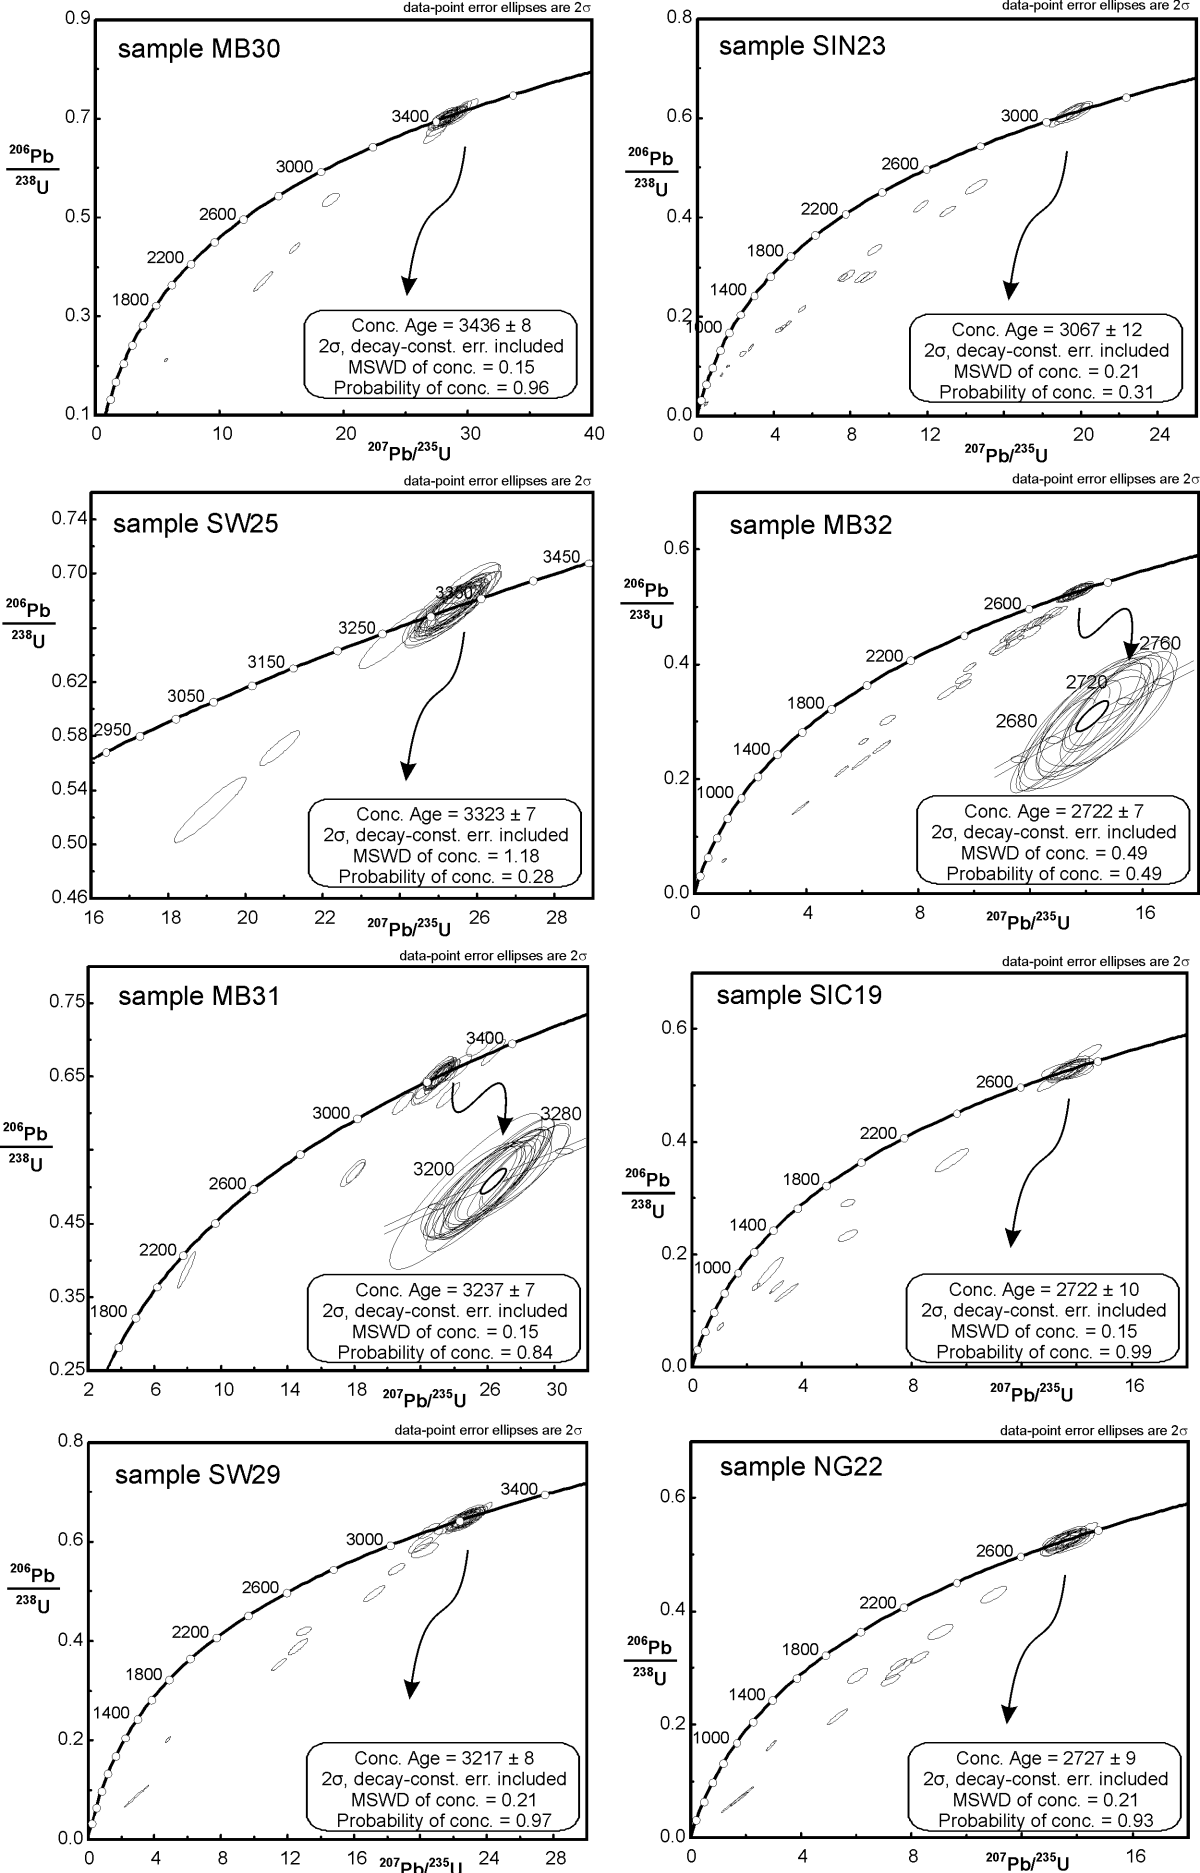

Fig. S2 (supplementary material). Concordia diagrams showing the results of U-Pb dating for sample MB30, SW25, MB31, SW29, SW26, MB32, SIC19, NG22.
